# Supplementary material for: The impact of physical frailty on the response to inactivated influenza vaccine in older adults
Source: Aging (Albany NY). 2020 Dec 9;12(24):24633–50. doi: 10.18632/aging.202207 (PMC7803506; doi:10.18632/aging.202207)
Supplement: Supplementary Table 1 [file aging-12-202207-s001.xlsx]

## Sheet: All DEGs
Supplemental Table 1
All differentially expressed genes between Non-Frail and Frail patients on days 0, 3, and 7.
Day 0 Non-Frail vs. Frail				Day 3 Non-Frail vs. Frail				Day 7 Non-Frail vs. Frail
Symbol	Entrez Gene Name	Expr Log Ratio		Symbol	Entrez Gene Name	Expr Log Ratio		Symbol	Entrez Gene Name	Expr Log Ratio
ABCA13	ATP binding cassette subfamily A member 13	1.33		ABCA5	ATP binding cassette subfamily A member 5	0.4		AAR2	AAR2 splicing factor	-0.27
ABCG1	ATP binding cassette subfamily G member 1	-0.59		ABCA13	ATP binding cassette subfamily A member 13	1.42		AB01944129	--	-0.76
ABLIM1	actin binding LIM protein 1	-0.35		ABCC1	ATP binding cassette subfamily C member 1	-0.32		ABCA13	ATP binding cassette subfamily A member 13	1.94
ABTB2	ankyrin repeat and BTB domain containing 2	-0.61		ABLIM1	actin binding LIM protein 1	-0.39		ABHD14B	abhydrolase domain containing 14B	-0.27
AC0078795	--	-0.73		AC0060428	--	0.44		ABT1	activator of basal transcription 1	-0.2
AC0184421	--	-0.36		AC0094952	--	0.48		AC0070387	--	0.4
AC240274.1	--	0.6		AC1279042	--	0.56		AC0187382	--	-1.07
ACTA2-AS1	ACTA2 antisense RNA 1	-0.35		ACAA2	acetyl-CoA acyltransferase 2	0.34		AC0792501	--	-0.54
ADAMTS5	ADAM metallopeptidase with thrombospondin type 1 motif 5	0.46		ACER2	alkaline ceramidase 2	-0.43		AC0926202	--	0.49
ADAMTSL4-AS1	ADAMTSL4 antisense RNA 1	-0.52		ACRBP	acrosin binding protein	-0.63		ACAP2-IT1	ACAP2 intronic transcript 1	0.94
ADAR	adenosine deaminase RNA specific	-0.49		ACVR2A	activin A receptor type 2A	0.36		ACER3	alkaline ceramidase 3	0.44
ADCY10P1	ADCY10 pseudogene 1	-0.25		ADAM9	ADAM metallopeptidase domain 9	0.34		ACSS3	acyl-CoA synthetase short chain family member 3	0.58
ADGRE5	adhesion G protein-coupled receptor E5	-0.48		ADAR	adenosine deaminase RNA specific	-0.36		ACTR2	actin related protein 2	0.35
ADRB2	adrenoceptor beta 2	0.46		ADO	2-aminoethanethiol dioxygenase	0.31		ADAM9	ADAM metallopeptidase domain 9	0.44
AEBP1	AE binding protein 1	-0.79		ADRB2	adrenoceptor beta 2	0.4		ADAMTS5	ADAM metallopeptidase with thrombospondin type 1 motif 5	0.57
AF0015485	--	-0.38		AEBP1	AE binding protein 1	-1.27		ADGRD1	adhesion G protein-coupled receptor D1	0.51
AGMAT	agmatinase	-0.47		AGFG1	ArfGAP with FG repeats 1	0.25		ADPRS	ADP-ribosylserine hydrolase	-0.3
AGRN	agrin	-1.03		AGMAT	agmatinase	-0.56		ADRB2	adrenoceptor beta 2	0.37
AHR	aryl hydrocarbon receptor	0.36		AGRN	agrin	-0.91		AEBP2	AE binding protein 2	0.4
AJAP1	adherens junctions associated protein 1	-0.98		AHSP	alpha hemoglobin stabilizing protein	0.79		AGFG1	ArfGAP with FG repeats 1	0.29
AKAP12	A-kinase anchoring protein 12	-1.55		AJAP1	adherens junctions associated protein 1	-0.92		AGRN	agrin	-0.98
AL0238061	--	0.49		AKAP12	A-kinase anchoring protein 12	-1.73		AHR	aryl hydrocarbon receptor	0.34
AL592183.1	--	0.62		AL592183.1	--	0.66		AIDA	axin interactor, dorsalization associated	0.43
ALDH1B1	aldehyde dehydrogenase 1 family member B1	0.36		ALCAM	activated leukocyte cell adhesion molecule	0.4		AK1	adenylate kinase 1	0.43
ALPK3	alpha kinase 3	-0.63		AMIGO1	adhesion molecule with Ig like domain 1	-0.39		AKAP12	A-kinase anchoring protein 12	-1.73
AMFR	autocrine motility factor receptor	0.35		ANKFY1	ankyrin repeat and FYVE domain containing 1	-0.25		AKR7A2	aldo-keto reductase family 7 member A2	-0.25
AMOTL1	angiomotin like 1	0.45		ANKRD6	ankyrin repeat domain 6	0.5		ALG1	ALG1 chitobiosyldiphosphodolichol beta-mannosyltransferase	-0.28
AMPD2	adenosine monophosphate deaminase 2	-0.42		ANKRD10	ankyrin repeat domain 10	0.27		ALG3	ALG3 alpha-1,3- mannosyltransferase	-0.34
ANKRD20A11P	ankyrin repeat domain 20 family member A11, pseudogene	1.57		ANKRD50	ankyrin repeat domain 50	0.34		AMFR	autocrine motility factor receptor	0.35
AOC2	amine oxidase copper containing 2	-0.77		ANKRD55	ankyrin repeat domain 55	-0.54		ANAPC11	anaphase promoting complex subunit 11	-0.27
AOC3	amine oxidase copper containing 3	-0.81		ANKRD10-IT1	ANKRD10 intronic transcript 1	0.52		ANKHD1/ANKHD1-EIF4EBP3	ankyrin repeat and KH domain containing 1	0.44
AOPEP	aminopeptidase O (putative)	-0.26		ANKRD20A11P	ankyrin repeat domain 20 family member A11, pseudogene	1.43		ANKRD28	ankyrin repeat domain 28	0.31
ARHGAP45	Rho GTPase activating protein 45	-0.29		ANO5	anoctamin 5	0.88		ANKRD10-IT1	ANKRD10 intronic transcript 1	0.56
ARHGEF37	Rho guanine nucleotide exchange factor 37	0.83		AP0062222	--	0.71		ANKRD20A11P	ankyrin repeat domain 20 family member A11, pseudogene	2.09
ARNTL2	aryl hydrocarbon receptor nuclear translocator like 2	0.7		APBB1	amyloid beta precursor protein binding family B member 1	-0.33		ANO5	anoctamin 5	0.66
ARRDC3-AS1	ARRDC3 antisense RNA 1	0.34		AQP3	aquaporin 3 (Gill blood group)	-0.44		ANP32B	acidic nuclear phosphoprotein 32 family member B	0.36
ASCL2	achaete-scute family bHLH transcription factor 2	0.44		ARAP2	ArfGAP with RhoGAP domain, ankyrin repeat and PH domain 2	0.39		ANXA3	annexin A3	0.66
ASPRV1	aspartic peptidase retroviral like 1	-0.57		ARG1	arginase 1	0.9		APBB1	amyloid beta precursor protein binding family B member 1	-0.37
ATG2A	autophagy related 2A	-0.68		ARL6	ADP ribosylation factor like GTPase 6	0.65		APCDD1	APC down-regulated 1	0.87
ATP1B1	ATPase Na+/K+ transporting subunit beta 1	0.47		ASAP2	ArfGAP with SH3 domain, ankyrin repeat and PH domain 2	-0.57		AQP3	aquaporin 3 (Gill blood group)	-0.51
ATXN7	ataxin 7	-0.24		ASCL2	achaete-scute family bHLH transcription factor 2	0.54		ARG1	arginase 1	1.13
AZU1	azurocidin 1	1.14		ASPH	aspartate beta-hydroxylase	0.45		ARHGEF28	Rho guanine nucleotide exchange factor 28	0.64
B3GNTL1	UDP-GlcNAc:betaGal beta-1,3-N-acetylglucosaminyltransferase like 1	-0.57		ASRGL1	asparaginase and isoaspartyl peptidase 1	-0.41		ARHGEF37	Rho guanine nucleotide exchange factor 37	0.85
B4GALT5	beta-1,4-galactosyltransferase 5	-0.46		ATG9B	autophagy related 9B	-0.66		ARL17A/ARL17B	ADP ribosylation factor like GTPase 17A	1.03
BCR	BCR activator of RhoGEF and GTPase	-0.26		ATP1B1	ATPase Na+/K+ transporting subunit beta 1	0.64		ARL6IP1	ADP ribosylation factor like GTPase 6 interacting protein 1	0.33
BPI	bactericidal permeability increasing protein	0.98		ATP8B4	ATPase phospholipid transporting 8B4 (putative)	0.54		ARMCX6	armadillo repeat containing X-linked 6	-0.24
BTBD11	BTB domain containing 11	-0.4		AURKA	aurora kinase A	-0.41		ASB2	ankyrin repeat and SOCS box containing 2	-0.51
BTBD19	BTB domain containing 19	-0.54		AZU1	azurocidin 1	1.49		ASPH	aspartate beta-hydroxylase	0.53
BTG1	BTG anti-proliferation factor 1	-0.19		B4GALT6	beta-1,4-galactosyltransferase 6	0.79		ASRGL1	asparaginase and isoaspartyl peptidase 1	-0.46
BTG2	BTG anti-proliferation factor 2	-0.3		BAG3	BAG cochaperone 3	-0.52		ASXL2	ASXL transcriptional regulator 2	0.22
C10orf105	chromosome 10 open reading frame 105	-0.53		BAG4	BAG cochaperone 4	0.25		ATP13A3	ATPase 13A3	0.26
C16orf54	chromosome 16 open reading frame 54	-0.36		BCL3	BCL3 transcription coactivator	-0.42		ATP5MC1	ATP synthase membrane subunit c locus 1	-0.32
CALCRL	calcitonin receptor like receptor	0.59		BCR	BCR activator of RhoGEF and GTPase	-0.28		ATP5PD	ATP synthase peripheral stalk subunit d	-0.26
CASP9	caspase 9	-0.36		BMP8B	bone morphogenetic protein 8b	0.57		ATP8B4	ATPase phospholipid transporting 8B4 (putative)	0.43
CBWD3/CBWD6	COBW domain containing 3	0.46		BNC2	basonuclin 2	0.66		ATXN7L3B	ataxin 7 like 3B	-0.2
CCDC112	coiled-coil domain containing 112	0.47		BPI	bactericidal permeability increasing protein	1.12		AZU1	azurocidin 1	1.12
CCDC124	coiled-coil domain containing 124	0.35		BPNT2	3'(2'), 5'-bisphosphate nucleotidase 2	0.25		B3GNT5	UDP-GlcNAc:betaGal beta-1,3-N-acetylglucosaminyltransferase 5	0.43
CCND1	cyclin D1	-1.7		BTG2	BTG anti-proliferation factor 2	-0.33		BAG6	BAG cochaperone 6	0.44
CCNDBP1	cyclin D1 binding protein 1	0.29		C3	complement C3	-1.13		BAK1	BCL2 antagonist/killer 1	-0.25
CCR1	C-C motif chemokine receptor 1	-0.59		C14orf28	chromosome 14 open reading frame 28	0.5		BATF3	basic leucine zipper ATF-like transcription factor 3	-0.65
CCR2	C-C motif chemokine receptor 2	0.34		C17orf75	chromosome 17 open reading frame 75	0.36		BCAM	basal cell adhesion molecule (Lutheran blood group)	1.06
CCR9	C-C motif chemokine receptor 9	-0.71		C3orf86	chromosome 3 open reading frame 86	-0.49		BCLAF3	BCLAF1 and THRAP3 family member 3	0.43
CCT6P3	chaperonin containing TCP1 subunit 6 pseudogene 3	0.42		C4orf46	chromosome 4 open reading frame 46	0.41		BFAR	bifunctional apoptosis regulator	-0.25
CD24	CD24 molecule	0.63		C5orf17	chromosome 5 putative open reading frame 17	-2.05		BLVRA	biliverdin reductase A	-0.4
CD36	CD36 molecule	0.44		C9orf72	C9orf72-SMCR8 complex subunit	0.48		BMPR2	bone morphogenetic protein receptor type 2	0.41
CD38	CD38 molecule	-0.35		CA8	carbonic anhydrase 8	-0.92		BPI	bactericidal permeability increasing protein	1.02
CDADC1	cytidine and dCMP deaminase domain containing 1	0.33		CALCRL	calcitonin receptor like receptor	0.65		BST2	bone marrow stromal cell antigen 2	-0.34
CDIP1	cell death inducing p53 target 1	-0.27		CASP10	caspase 10	-0.26		BTBD11	BTB domain containing 11	-0.33
CDKN2C	cyclin dependent kinase inhibitor 2C	0.66		CBR4	carbonyl reductase 4	0.33		BTG2	BTG anti-proliferation factor 2	-0.25
CEACAM6	CEA cell adhesion molecule 6	1.43		CBWD5	COBW domain containing 5	0.5		BZW2	basic leucine zipper and W2 domains 2	-0.34
CEBPG	CCAAT enhancer binding protein gamma	0.27		CBWD3/CBWD6	COBW domain containing 3	0.43		C12orf43	chromosome 12 open reading frame 43	-0.28
CERCAM	cerebral endothelial cell adhesion molecule	1.13		CC2D2B	coiled-coil and C2 domain containing 2B	0.65		C18orf54	chromosome 18 open reading frame 54	0.64
CFH	complement factor H	0.71		CCDC112	coiled-coil domain containing 112	0.57		C1orf226	chromosome 1 open reading frame 226	1.77
CH17_258A224	--	-1.63		CCDC122	coiled-coil domain containing 122	0.69		C20orf194	chromosome 20 open reading frame 194	0.25
CH507-513H4.4	--	5.44		CCDC157	coiled-coil domain containing 157	-0.41		C5orf17	chromosome 5 putative open reading frame 17	-2.53
CH507-513H4.5	--	3.47		CCDC159	coiled-coil domain containing 159	-0.34		C5orf22	chromosome 5 open reading frame 22	0.27
CH507-513H4.6	--	3.85		CCDC90B	coiled-coil domain containing 90B	0.3		C5orf24	chromosome 5 open reading frame 24	0.36
CHRNA10	cholinergic receptor nicotinic alpha 10 subunit	-0.46		CCNB1	cyclin B1	-0.51		C7orf31	chromosome 7 open reading frame 31	0.47
CHSY1	chondroitin sulfate synthase 1	-0.43		CCND1	cyclin D1	-1.82		C9orf40	chromosome 9 open reading frame 40	0.57
CISD2	CDGSH iron sulfur domain 2	0.62		CCNL2P1	cyclin L2 pseudogene 1	-0.43		C9orf72	C9orf72-SMCR8 complex subunit	0.41
CLEC4D	C-type lectin domain family 4 member D	0.72		CCR1	C-C motif chemokine receptor 1	-0.54		CA2	carbonic anhydrase 2	0.73
CLEC5A	C-type lectin domain containing 5A	0.79		CCR4	C-C motif chemokine receptor 4	-0.41		CALCRL	calcitonin receptor like receptor	0.78
CLIC2	chloride intracellular channel 2	0.7		CCR7	C-C motif chemokine receptor 7	-0.6		CAPN5	calpain 5	0.59
CMAS	cytidine monophosphate N-acetylneuraminic acid synthetase	0.31		CCR12P	C-C motif chemokine receptor 12, pseudogene	-1.01		CAPRIN2	caprin family member 2	0.27
CMPK2	cytidine/uridine monophosphate kinase 2	-0.95		CCSER1	coiled-coil serine rich protein 1	0.57		CARM1	coactivator associated arginine methyltransferase 1	0.62
CMTM4	CKLF like MARVEL transmembrane domain containing 4	0.3		CD4	CD4 molecule	-0.35		CAST	calpastatin	0.24
CMTR1	cap methyltransferase 1	-0.29		CD27	CD27 molecule	-0.48		CASTOR2	cytosolic arginine sensor for mTORC1 subunit 2	0.6
CNN2	calponin 2	-0.32		CD40LG	CD40 ligand	-0.35		CBWD3/CBWD6	COBW domain containing 3	0.57
CNPPD1	cyclin Pas1/PHO80 domain containing 1	0.44		CDC16	cell division cycle 16	0.23		CCDC51	coiled-coil domain containing 51	-0.37
COA1	cytochrome c oxidase assembly factor 1 homolog	-0.27		CDH23	cadherin related 23	-0.28		CCDC115	coiled-coil domain containing 115	-0.19
COL6A3	collagen type VI alpha 3 chain	-0.67		CDIP1	cell death inducing p53 target 1	-0.37		CCNB1	cyclin B1	-0.82
CORIN	corin, serine peptidase	0.86		CERCAM	cerebral endothelial cell adhesion molecule	1.42		CCND1	cyclin D1	-1.83
COX6A1P2	cytochrome c oxidase subunit 6A1 pseudogene 2	0.51		CH17_258A224	--	1.44		CCNI	cyclin I	0.4
COX7A2L	cytochrome c oxidase subunit 7A2 like	0.32		CHMP7	charged multivesicular body protein 7	-0.34		CCPG1	cell cycle progression 1	0.37
CPA3	carboxypeptidase A3	-1.29		CHPT1	choline phosphotransferase 1	0.55		CCT3	chaperonin containing TCP1 subunit 3	-0.28
CPNE5	copine 5	-0.62		CISD2	CDGSH iron sulfur domain 2	0.64		CCT6P3	chaperonin containing TCP1 subunit 6 pseudogene 3	0.67
CPNE8	copine 8	0.51		CLASP2	cytoplasmic linker associated protein 2	0.18		CD24	CD24 molecule	0.89
CPOX	coproporphyrinogen oxidase	0.26		CLDND2	claudin domain containing 2	0.68		CD38	CD38 molecule	-0.39
CREG1	cellular repressor of E1A stimulated genes 1	0.45		CLEC18A/CLEC18C	C-type lectin domain family 18 member A	-1.37		CD44	CD44 molecule (Indian blood group)	0.2
CRTAM	cytotoxic and regulatory T cell molecule	0.56		CLEC5A	C-type lectin domain containing 5A	0.76		CD226	CD226 molecule	0.46
CSGALNACT1	chondroitin sulfate N-acetylgalactosaminyltransferase 1	-0.43		CLIC2	chloride intracellular channel 2	0.72		CD302	CD302 molecule	0.39
CSRNP1	cysteine and serine rich nuclear protein 1	-0.42		CLN6	CLN6 transmembrane ER protein	-0.33		CD1D	CD1d molecule	-0.38
CTA_212A21	--	-0.48		CMPK2	cytidine/uridine monophosphate kinase 2	-0.83		CDC16	cell division cycle 16	0.26
CTAG2	cancer/testis antigen 2	-5.65		CMTR1	cap methyltransferase 1	-0.26		CDC42EP3	CDC42 effector protein 3	0.34
CTBP2P8	CTBP2 pseudogene 8	-0.91		CNP	2',3'-cyclic nucleotide 3' phosphodiesterase	-0.26		CDH23	cadherin related 23	-0.32
CTD_2047H163	--	-0.55		CNR1	cannabinoid receptor 1	1.01		CEACAM6	CEA cell adhesion molecule 6	1.67
CTD_2554C211	--	-0.41		CNST	consortin, connexin sorting protein	-0.25		CEACAM8	CEA cell adhesion molecule 8	1.42
CTD_2587H2414	--	-0.58		CNTF	ciliary neurotrophic factor	0.48		CEBPZOS	CEBPZ opposite strand	0.39
CTNNAL1	catenin alpha like 1	0.78		CNTNAP3C	contactin associated protein family member 3C	0.83		CERCAM	cerebral endothelial cell adhesion molecule	1.41
CXCL16	C-X-C motif chemokine ligand 16	-0.66		COL6A3	collagen type VI alpha 3 chain	-0.79		CERT1	ceramide transporter 1	0.24
CXCR2	C-X-C motif chemokine receptor 2	-0.49		COPRS	coordinator of PRMT5 and differentiation stimulator	0.42		CFAP20	cilia and flagella associated protein 20	-0.21
CYP2D8P	ccytochrome P450 family 2 subfamily D member 8, pseudogene	-0.6		CORIN	corin, serine peptidase	1.01		CFAP70	cilia and flagella associated protein 70	0.57
CYP4F12	cytochrome P450 family 4 subfamily F member 12	-0.56		COX7A2L	cytochrome c oxidase subunit 7A2 like	0.3		CH17_189H201	--	0.77
DAAM2	dishevelled associated activator of morphogenesis 2	-1.4		CPA3	carboxypeptidase A3	-1.28		CH17_258A224	--	0.91
DAPK1	death associated protein kinase 1	-0.44		CPNE3	copine 3	0.25		CHMP7	charged multivesicular body protein 7	-0.3
DCAF10	DDB1 and CUL4 associated factor 10	0.28		CPNE5	copine 5	-0.74		CHPT1	choline phosphotransferase 1	0.74
DCBLD1	discoidin, CUB and LCCL domain containing 1	0.6		CREG1	cellular repressor of E1A stimulated genes 1	0.43		CIAPIN1	cytokine induced apoptosis inhibitor 1	-0.25
DEFA4	defensin alpha 4	1.61		CRTAM	cytotoxic and regulatory T cell molecule	0.57		CISD2	CDGSH iron sulfur domain 2	0.79
DEFA1 (includes others)	defensin alpha 1	2.31		CRTC2	CREB regulated transcription coactivator 2	-0.34		CLEC4D	C-type lectin domain family 4 member D	0.74
DGCR2	DiGeorge syndrome critical region gene 2	-0.3		CSGALNACT1	chondroitin sulfate N-acetylgalactosaminyltransferase 1	-0.41		CLEC5A	C-type lectin domain containing 5A	0.93
DGKK	diacylglycerol kinase kappa	1.23		CSRNP1	cysteine and serine rich nuclear protein 1	-0.4		CLHC1	clathrin heavy chain linker domain containing 1	0.55
DGLUCY	D-glutamate cyclase	-0.45		CTAG2	cancer/testis antigen 2	-5.83		CLIC2	chloride intracellular channel 2	0.64
DHX58	DExH-box helicase 58	-0.48		CTB_133G61	--	-0.31		CLP1	cleavage factor polyribonucleotide kinase subunit 1	-0.24
DLGAP2	DLG associated protein 2	2.08		CTC-338M12.4	uncharacterized LOC101928649	0.33		CMPK2	cytidine/uridine monophosphate kinase 2	-1.03
DPEP2	dipeptidase 2	-0.4		CTC_137K31	--	0.55		CMTM4	CKLF like MARVEL transmembrane domain containing 4	0.39
DPEP3	dipeptidase 3	-0.56		CTD_2047H163	--	-0.5		CMTR1	cap methyltransferase 1	-0.33
DSP	desmoplakin	1.45		CTNNAL1	catenin alpha like 1	0.99		CNR1	cannabinoid receptor 1	0.92
DTX1	deltex E3 ubiquitin ligase 1	-0.65		CTSG	cathepsin G	1.31		CNTNAP3	contactin associated protein family member 3	0.67
DUSP16	dual specificity phosphatase 16	-0.29		CTTN	cortactin	-0.66		COL9A2	collagen type IX alpha 2 chain	-0.46
ECE1-AS1	ECE1 antisense RNA 1	-0.45		CXCL16	C-X-C motif chemokine ligand 16	-0.53		CORIN	corin, serine peptidase	0.9
ECSIT	ECSIT signaling integrator	0.31		DAPK1	death associated protein kinase 1	-0.45		CPA3	carboxypeptidase A3	-1.36
EEF1A1P6	eukaryotic translation elongation factor 1 alpha 1 pseudogene 6	1.4		DCAF10	DDB1 and CUL4 associated factor 10	0.34		CPEB4	cytoplasmic polyadenylation element binding protein 4	0.33
EEPD1	endonuclease/exonuclease/phosphatase family domain containing 1	-0.4		DCBLD1	discoidin, CUB and LCCL domain containing 1	0.47		CPNE3	copine 3	0.31
EGLN3	egl-9 family hypoxia inducible factor 3	-0.62		DCK	deoxycytidine kinase	0.3		CPT1A	carnitine palmitoyltransferase 1A	0.4
EHHADH	enoyl-CoA hydratase and 3-hydroxyacyl CoA dehydrogenase	0.62		DEFA4	defensin alpha 4	1.61		CREG1	cellular repressor of E1A stimulated genes 1	0.46
EIF1B-AS1	EIF1B antisense RNA 1	-0.32		DEFA1 (includes others)	defensin alpha 1	1.95		CRISP3	cysteine rich secretory protein 3	1.46
EIF3CL	eukaryotic translation initiation factor 3 subunit C like	2.18		DGKA	diacylglycerol kinase alpha	-0.42		CTA_384D834	--	-0.53
EIF4BP6	eukaryotic translation initiation factor 4B pseudogene 6	0.32		DGKK	diacylglycerol kinase kappa	1.2		CTAG2	cancer/testis antigen 2	-4.18
ELMO1	engulfment and cell motility 1	-0.28		DGLUCY	D-glutamate cyclase	-0.36		CTBS	chitobiase	0.39
ELOB	elongin B	0.32		DHRS11	dehydrogenase/reductase 11	-0.46		CTC-338M12.4	uncharacterized LOC101928649	0.34
EML6	EMAP like 6	-0.64		DIAPH2	diaphanous related formin 2	0.27		CTLA4	cytotoxic T-lymphocyte associated protein 4	-0.4
ENPP2	ectonucleotide pyrophosphatase/phosphodiesterase 2	-0.73		DISP1	dispatched RND transporter family member 1	0.51		CTNNAL1	catenin alpha like 1	0.74
ENPP3	ectonucleotide pyrophosphatase/phosphodiesterase 3	-1.2		DLGAP2	DLG associated protein 2	3.57		CUL4A	cullin 4A	0.27
EPAS1	endothelial PAS domain protein 1	-0.54		DNAJC1	DnaJ heat shock protein family (Hsp40) member C1	0.36		CYB561D2	cytochrome b561 family member D2	-0.28
EPHB1	EPH receptor B1	-0.61		DNAJC24	DnaJ heat shock protein family (Hsp40) member C24	0.33		CYC1	cytochrome c1	-0.24
ERAP2	endoplasmic reticulum aminopeptidase 2	-0.93		DNAJC25	DnaJ heat shock protein family (Hsp40) member C25	0.61		DAPK1	death associated protein kinase 1	-0.33
ERFE	erythroferrone	1.46		DPH6	diphthamine biosynthesis 6	0.42		DCAF10	DDB1 and CUL4 associated factor 10	0.38
ERN1	endoplasmic reticulum to nucleus signaling 1	-0.35		DTHD1	death domain containing 1	0.69		DCUN1D1	defective in cullin neddylation 1 domain containing 1	0.55
EXOC3L1	exocyst complex component 3 like 1	-1.03		DTX1	deltex E3 ubiquitin ligase 1	-0.76		DDOST	dolichyl-diphosphooligosaccharide--protein glycosyltransferase non-catalytic subunit	-0.19
EXTL3	exostosin like glycosyltransferase 3	-0.43		DUSP16	dual specificity phosphatase 16	-0.3		DDX28	DEAD-box helicase 28	-0.34
FAM110C	family with sequence similarity 110 member C	0.8		DYNLRB1	dynein light chain roadblock-type 1	-0.23		DDX10P1	DEAD-box helicase 10 pseudogene 1	0.8
FAM131B	family with sequence similarity 131 member B	0.71		EGLN3	egl-9 family hypoxia inducible factor 3	-0.69		DEFA4	defensin alpha 4	1.99
FAM153A/FAM153B	family with sequence similarity 153 member B	-0.79		EHD3	EH domain containing 3	-0.47		DEFA1 (includes others)	defensin alpha 1	1.69
FAM189B	family with sequence similarity 189 member B	-0.52		ELAPOR2	endosome-lysosome associated apoptosis and autophagy regulator family member 2	-0.53		DGKK	diacylglycerol kinase kappa	1.56
FAM20B	FAM20B glycosaminoglycan xylosylkinase	0.26		ELOVL6	ELOVL fatty acid elongase 6	0.49		DGUOK	deoxyguanosine kinase	-0.18
FAM228B	family with sequence similarity 228 member B	0.24		ENKUR	enkurin, TRPC channel interacting protein	-0.88		DHX58	DExH-box helicase 58	-0.59
FAM53C	family with sequence similarity 53 member C	-0.35		ENPP2	ectonucleotide pyrophosphatase/phosphodiesterase 2	-0.73		DLEU2	deleted in lymphocytic leukemia 2	0.48
FANCA	FA complementation group A	-0.4		ENPP3	ectonucleotide pyrophosphatase/phosphodiesterase 3	-0.95		DLGAP2	DLG associated protein 2	3.33
FAT1	FAT atypical cadherin 1	1.2		EPAS1	endothelial PAS domain protein 1	-0.56		DMTN	dematin actin binding protein	0.62
FBLN2	fibulin 2	-0.98		EPHA1	EPH receptor A1	-0.58		DNAJA4	DnaJ heat shock protein family (Hsp40) member A4	0.44
FBP1	fructose-bisphosphatase 1	-0.37		EPHB2	EPH receptor B2	-0.67		DNAJB2	DnaJ heat shock protein family (Hsp40) member B2	0.49
FBXO30	F-box protein 30	0.37		EPPK1	epiplakin 1	-1.01		DNAJB14	DnaJ heat shock protein family (Hsp40) member B14	0.44
FDFT1	farnesyl-diphosphate farnesyltransferase 1	0.19		EPS8	epidermal growth factor receptor pathway substrate 8	0.5		DPH2	diphthamide biosynthesis 2	-0.36
FEZ1	fasciculation and elongation protein zeta 1	0.75		ERAP2	endoplasmic reticulum aminopeptidase 2	-0.91		DPY19L1	dpy-19 like C-mannosyltransferase 1	0.34
FGD3	FYVE, RhoGEF and PH domain containing 3	-0.32		ERFE	erythroferrone	1.34		DRAP1	DR1 associated protein 1	-0.3
FHIT	fragile histidine triad diadenosine triphosphatase	-0.66		ERO1B	endoplasmic reticulum oxidoreductase 1 beta	0.31		DSC2	desmocollin 2	0.88
FHL2	four and a half LIM domains 2	0.78		ESAM	endothelial cell adhesion molecule	-0.65		DSP	desmoplakin	1.29
FIS1	fission, mitochondrial 1	0.34		ESYT1	extended synaptotagmin 1	-0.32		DTNBP1	dystrobrevin binding protein 1	0.37
FLJ45513	uncharacterized LOC729220	-0.4		FAAP24	FA core complex associated protein 24	-0.51		DUSP2	dual specificity phosphatase 2	-0.71
FLNB	filamin B	-0.47		FAIM	Fas apoptotic inhibitory molecule	-0.39		DUSP14	dual specificity phosphatase 14	-0.39
FMNL1	formin like 1	-0.41		FAM102A	family with sequence similarity 102 member A	-0.45		ECHS1	enoyl-CoA hydratase, short chain 1	-0.31
FOSL2	FOS like 2, AP-1 transcription factor subunit	-0.38		FAM110C	family with sequence similarity 110 member C	1.27		EEF1B2	eukaryotic translation elongation factor 1 beta 2	-0.77
FOXO1	forkhead box O1	-0.21		FAM131B	family with sequence similarity 131 member B	0.64		EEF1B2P3	eukaryotic translation elongation factor 1 beta 2 pseudogene 3	-0.75
FPR2	formyl peptide receptor 2	-0.47		FAM153A/FAM153B	family with sequence similarity 153 member B	-0.86		EEF1DP3	eukaryotic translation elongation factor 1 delta pseudogene 3	0.5
FSD1L	fibronectin type III and SPRY domain containing 1 like	0.51		FAM157A/FAM157B	family with sequence similarity 157 member A	0.63		EEF2KMT	eukaryotic elongation factor 2 lysine methyltransferase	-0.36
FUNDC2	FUN14 domain containing 2	0.37		FAM20B	FAM20B glycosaminoglycan xylosylkinase	0.28		EIF1	eukaryotic translation initiation factor 1	0.25
FUT4	fucosyltransferase 4	0.25		FAM210B	family with sequence similarity 210 member B	0.51		EIF1B	eukaryotic translation initiation factor 1B	0.34
FXYD6	FXYD domain containing ion transport regulator 6	-0.59		FAT1	FAT atypical cadherin 1	1.11		EIF4A3	eukaryotic translation initiation factor 4A3	-0.3
FZD5	frizzled class receptor 5	0.6		FBXL4	F-box and leucine rich repeat protein 4	0.23		ENDOG	endonuclease G	-0.47
GALM	galactose mutarotase	-0.3		FBXO30-DT	FBXO30 divergent transcript	0.4		ENPP2	ectonucleotide pyrophosphatase/phosphodiesterase 2	-0.67
GALNT1	polypeptide N-acetylgalactosaminyltransferase 1	0.29		FEM1C	fem-1 homolog C	0.36		EPPK1	epiplakin 1	-0.76
GALNT6	polypeptide N-acetylgalactosaminyltransferase 6	0.32		FEZ1	fasciculation and elongation protein zeta 1	0.89		ERAP2	endoplasmic reticulum aminopeptidase 2	-0.97
GAS2L3	growth arrest specific 2 like 3	0.53		FHDC1	FH2 domain containing 1	0.48		ERFE	erythroferrone	1.57
GASK1B	golgi associated kinase 1B	0.52		FHIT	fragile histidine triad diadenosine triphosphatase	-0.53		ERICH1	glutamate rich 1	0.31
GATA2	GATA binding protein 2	-1.4		FLNB	filamin B	-0.52		ETS1	ETS proto-oncogene 1, transcription factor	-0.23
GBGT1	globoside alpha-1,3-N-acetylgalactosaminyltransferase 1 (FORS blood group)	0.32		FLVCR1-DT	FLVCR1 divergent transcript	-0.6		EVI5	ecotropic viral integration site 5	0.29
GCLC	glutamate-cysteine ligase catalytic subunit	0.41		FSD1L	fibronectin type III and SPRY domain containing 1 like	0.58		EVPL	envoplakin	1.15
GCNT1	glucosaminyl (N-acetyl) transferase 1	0.32		FTH1P7	ferritin heavy chain 1 pseudogene 7	-0.62		EXOC3L1	exocyst complex component 3 like 1	-0.97
GID4	GID complex subunit 4 homolog	0.38		FUT4	fucosyltransferase 4	0.35		EXOSC5	exosome component 5	-0.4
GINS3	GINS complex subunit 3	-0.55		FXYD6	FXYD domain containing ion transport regulator 6	-0.6		F5	coagulation factor V	0.38
GLCE	glucuronic acid epimerase	0.32		FZD5	frizzled class receptor 5	0.59		FAM110C	family with sequence similarity 110 member C	0.82
GNA12	G protein subunit alpha 12	0.6		GASK1B	golgi associated kinase 1B	0.52		FAM111B	family with sequence similarity 111 member B	-0.74
GNG10	G protein subunit gamma 10	0.55		GATA2	GATA binding protein 2	-1.46		FAM114A1	family with sequence similarity 114 member A1	0.55
GOLGA8Q	golgin A8 family member Q	-0.77		GATAD1	GATA zinc finger domain containing 1	0.24		FAM131B	family with sequence similarity 131 member B	0.84
GOLM1	golgi membrane protein 1	0.48		GCLC	glutamate-cysteine ligase catalytic subunit	0.42		FAM133B	family with sequence similarity 133 member B	0.52
GPA33	glycoprotein A33	-0.53		GCLM	glutamate-cysteine ligase modifier subunit	0.37		FAM151B	family with sequence similarity 151 member B	0.43
GPLD1	glycosylphosphatidylinositol specific phospholipase D1	0.54		GCNT4	glucosaminyl (N-acetyl) transferase 4	-0.53		FAM20B	FAM20B glycosaminoglycan xylosylkinase	0.26
GPN3	GPN-loop GTPase 3	0.43		GCSAML	germinal center associated signaling and motility like	-0.99		FAM210B	family with sequence similarity 210 member B	0.69
GRAP	GRB2 related adaptor protein	-0.4		GID4	GID complex subunit 4 homolog	0.37		FANCA	FA complementation group A	-0.35
GRAPL	GRB2 related adaptor protein like	-2.96		GIMAP8	GTPase, IMAP family member 8	-0.35		FAR1	fatty acyl-CoA reductase 1	0.39
GS1_184P142	--	3.24		GK5	glycerol kinase 5	0.34		FAT1	FAT atypical cadherin 1	1.23
H2AC18/H2AC19	H2A clustered histone 18	2.49		GLRX5	glutaredoxin 5	0.62		FBP1	fructose-bisphosphatase 1	-0.62
H2BU1	H2B.U histone 1	0.75		GNA12	G protein subunit alpha 12	0.42		FBXL4	F-box and leucine rich repeat protein 4	0.28
H3C3	H3 clustered histone 3	-0.52		GNPTAB	N-acetylglucosamine-1-phosphate transferase subunits alpha and beta	0.22		FBXO30	F-box protein 30	0.39
H4C14	H4 clustered histone 14	3.76		GOLGA8K (includes others)	golgin A8 family member K	-0.85		FBXO48	F-box protein 48	0.3
HBD	hemoglobin subunit delta	0.86		GOPC	golgi associated PDZ and coiled-coil motif containing	0.34		FCER1A	Fc fragment of IgE receptor Ia	-0.58
HCCS	holocytochrome c synthase	0.24		GP1BA	glycoprotein Ib platelet subunit alpha	-0.8		FEM1C	fem-1 homolog C	0.45
HDC	histidine decarboxylase	-1.44		GPA33	glycoprotein A33	-0.77		FHL2	four and a half LIM domains 2	0.68
HELZ2	helicase with zinc finger 2	-0.68		GRAP	GRB2 related adaptor protein	-0.43		FLVCR1-DT	FLVCR1 divergent transcript	-0.47
HERC5	HECT and RLD domain containing E3 ubiquitin protein ligase 5	-1.04		GSAP	gamma-secretase activating protein	0.24		FLYWCH2	FLYWCH family member 2	-0.34
HERC6	HECT and RLD domain containing E3 ubiquitin protein ligase family member 6	-0.6		GTF2I	general transcription factor IIi	-0.32		FSD1L	fibronectin type III and SPRY domain containing 1 like	0.62
HES6	hes family bHLH transcription factor 6	0.76		H2AC14	H2A clustered histone 14	-0.62		FURIN	furin, paired basic amino acid cleaving enzyme	0.47
HIF1A	hypoxia inducible factor 1 subunit alpha	-0.32		HCFC2	host cell factor C2	0.31		FZD5	frizzled class receptor 5	0.84
HIVEP1	HIVEP zinc finger 1	-0.26		HCG4P7	HLA complex group 4 pseudogene 7	0.61		GABARAPL2	GABA type A receptor associated protein like 2	0.41
HIVEP2	HIVEP zinc finger 2	-0.22		HDC	histidine decarboxylase	-1.58		GALE	UDP-galactose-4-epimerase	-0.35
HLA-E	major histocompatibility complex, class I, E	-0.25		HECW2-AS1	HECW2 antisense RNA 1	-0.71		GALM	galactose mutarotase	-0.33
HLA-F-AS1	HLA-F antisense RNA 1	0.47		HERC5	HECT and RLD domain containing E3 ubiquitin protein ligase 5	-0.82		GALNT3	polypeptide N-acetylgalactosaminyltransferase 3	0.38
HMBS	hydroxymethylbilane synthase	0.54		HERC6	HECT and RLD domain containing E3 ubiquitin protein ligase family member 6	-0.49		GAR1	GAR1 ribonucleoprotein	0.67
HPS1	HPS1 biogenesis of lysosomal organelles complex 3 subunit 1	0.45		HES4	hes family bHLH transcription factor 4	-1.02		GASK1B	golgi associated kinase 1B	0.52
HRH4	histamine receptor H4	-0.74		HES6	hes family bHLH transcription factor 6	1.19		GATA1	GATA binding protein 1	0.62
HSH2D	hematopoietic SH2 domain containing	-0.59		HKDC1	hexokinase domain containing 1	-1.01		GATA2	GATA binding protein 2	-1.15
HSPA6	heat shock protein family A (Hsp70) member 6	-0.43		HLA-F-AS1	HLA-F antisense RNA 1	0.48		GBGT1	globoside alpha-1,3-N-acetylgalactosaminyltransferase 1 (FORS blood group)	0.33
HTR7P1	5-hydroxytryptamine receptor 7 pseudogene 1	0.44		HRH4	histamine receptor H4	-0.68		GCLC	glutamate-cysteine ligase catalytic subunit	0.36
IFI6	interferon alpha inducible protein 6	-0.82		HS2ST1	heparan sulfate 2-O-sulfotransferase 1	0.4		GCLM	glutamate-cysteine ligase modifier subunit	0.37
IFIT1	interferon induced protein with tetratricopeptide repeats 1	-1.19		HSDL1	hydroxysteroid dehydrogenase like 1	0.26		GCSAML	germinal center associated signaling and motility like	-0.92
IFIT2	interferon induced protein with tetratricopeptide repeats 2	-0.77		HSH2D	hematopoietic SH2 domain containing	-0.43		GID4	GID complex subunit 4 homolog	0.52
IFIT3	interferon induced protein with tetratricopeptide repeats 3	-0.78		HSP90AB1	heat shock protein 90 alpha family class B member 1	-0.24		GIMAP6	GTPase, IMAP family member 6	-0.26
IFITM3	interferon induced transmembrane protein 3	-0.84		HSP90B2P	heat shock protein 90 beta family member 2, pseudogene	0.67		GINS3	GINS complex subunit 3	-0.48
IGF2BP2	insulin like growth factor 2 mRNA binding protein 2	0.65		IDO1	indoleamine 2,3-dioxygenase 1	-0.56		GK5	glycerol kinase 5	0.31
IGF2R	insulin like growth factor 2 receptor	-0.47		IFI27	interferon alpha inducible protein 27	-1.34		GLT8D1	glycosyltransferase 8 domain containing 1	-0.19
IGFBP3	insulin like growth factor binding protein 3	0.62		IFI35	interferon induced protein 35	-0.4		GNA12	G protein subunit alpha 12	0.58
IGHG2	immunoglobulin heavy constant gamma 2 (G2m marker)	-1.32		IFIT1	interferon induced protein with tetratricopeptide repeats 1	-1.02		GNGT2	G protein subunit gamma transducin 2	-0.46
IGHG3	immunoglobulin heavy constant gamma 3 (G3m marker)	-0.99		IFITM3	interferon induced transmembrane protein 3	-0.95		GOLGA8K (includes others)	golgin A8 family member K	0.64
IGHG4	immunoglobulin heavy constant gamma 4 (G4m marker)	-1.12		IGFBP2	insulin like growth factor binding protein 2	-1.31		GPA33	glycoprotein A33	-0.5
IGHGP	immunoglobulin heavy constant gamma P (non-functional)	-1.51		IGHA1	immunoglobulin heavy constant alpha 1	-1.57		GPR160	G protein-coupled receptor 160	0.6
IGHV3-33	immunoglobulin heavy variable 3-33	-1.16		IGHA2	immunoglobulin heavy constant alpha 2 (A2m marker)	-1.25		GPR141BP	G protein-coupled receptor 141B, pseudogene	0.74
IGHV3-48	immunoglobulin heavy variable 3-48	-1.14		IGHG2	immunoglobulin heavy constant gamma 2 (G2m marker)	-1.34		GPR89A/GPR89B	G protein-coupled receptor 89B	0.4
IGKV1-9	immunoglobulin kappa variable 1-9	-0.9		IGHG3	immunoglobulin heavy constant gamma 3 (G3m marker)	-1.19		GRAP	GRB2 related adaptor protein	-0.5
IGLV1-40	immunoglobulin lambda variable 1-40	-0.69		IGHGP	immunoglobulin heavy constant gamma P (non-functional)	-1.2		GRWD1	glutamate rich WD repeat containing 1	-0.25
IGLV1-51	immunoglobulin lambda variable 1-51	-0.67		IGHV3-7	immunoglobulin heavy variable 3-7	-1.1		H1-2	H1.2 linker histone, cluster member	-0.34
IGLV2-8	immunoglobulin lambda variable 2-8	-1.91		IGHV3-48	immunoglobulin heavy variable 3-48	-1.4		H1-3	H1.3 linker histone, cluster member	-0.43
IL1RL1	interleukin 1 receptor like 1	-0.83		IGKC	immunoglobulin kappa constant	-0.88		H1-4	H1.4 linker histone, cluster member	-0.37
IL3RA	interleukin 3 receptor subunit alpha	-0.74		IGKV1-6	immunoglobulin kappa variable 1-6	-1.33		H2BC10	H2B clustered histone 10	-0.44
IL6R	interleukin 6 receptor	-0.37		IGKV2-30	immunoglobulin kappa variable 2-30	-1.3		H3C1	H3 clustered histone 1	-0.37
IQCN	IQ motif containing N	-0.55		IGKV2D-29	immunoglobulin kappa variable 2D-29	-1.71		H3C8	H3 clustered histone 8	-0.82
IRF7	interferon regulatory factor 7	-0.55		IGKV3-11	immunoglobulin kappa variable 3-11	-0.9		H3C12	H3 clustered histone 12	-0.7
IRF9	interferon regulatory factor 9	-0.42		IGKV3-20	immunoglobulin kappa variable 3-20	-0.83		H4C11	H4 clustered histone 11	-1.69
ISG15	ISG15 ubiquitin like modifier	-1.09		IGKV4-1	immunoglobulin kappa variable 4-1	-0.87		HAGH	hydroxyacylglutathione hydrolase	0.57
ISG20	interferon stimulated exonuclease gene 20	-0.42		IGLC2	immunoglobulin lambda constant 2	-1.25		HDC	histidine decarboxylase	-1.59
ITGAX	integrin subunit alpha X	-0.53		IGLV1-40	immunoglobulin lambda variable 1-40	-1.05		HDGF	heparin binding growth factor	0.45
ITM2A	integral membrane protein 2A	0.51		IGLV1-44	immunoglobulin lambda variable 1-44	-1.22		HELZ2	helicase with zinc finger 2	-0.44
ITPK1	inositol-tetrakisphosphate 1-kinase	-0.33		IGLV1-51	immunoglobulin lambda variable 1-51	-0.78		HERC4	HECT and RLD domain containing E3 ubiquitin protein ligase 4	0.31
KANK1	KN motif and ankyrin repeat domains 1	-0.66		IGLV2-8	immunoglobulin lambda variable 2-8	-2.27		HERC5	HECT and RLD domain containing E3 ubiquitin protein ligase 5	-1.09
KANK2	KN motif and ankyrin repeat domains 2	0.74		IGLV3-25	immunoglobulin lambda variable 3-25	-1.58		HERC6	HECT and RLD domain containing E3 ubiquitin protein ligase family member 6	-0.61
KANSL1-AS1	KANSL1 antisense RNA 1	1.04		IL1RL1	interleukin 1 receptor like 1	-0.97		HERC2P9	hect domain and RLD 2 pseudogene 9	0.25
KAT2B	lysine acetyltransferase 2B	0.5		IL4I1	interleukin 4 induced 1	-0.64		HERPUD1	homocysteine inducible ER protein with ubiquitin like domain 1	-0.19
KCND1	potassium voltage-gated channel subfamily D member 1	-0.77		IQCB1	IQ motif containing B1	0.34		HES4	hes family bHLH transcription factor 4	-1.3
KCTD3	potassium channel tetramerization domain containing 3	0.38		ISCA1	iron-sulfur cluster assembly 1	0.48		HGH1	HGH1 homolog	-0.32
KCTD18	potassium channel tetramerization domain containing 18	0.21		ISG15	ISG15 ubiquitin like modifier	-1.08		HIC1	HIC ZBTB transcriptional repressor 1	-0.64
KDM5C	lysine demethylase 5C	-0.23		ISG20	interferon stimulated exonuclease gene 20	-0.43		HINT2	histidine triad nucleotide binding protein 2	-0.53
KIT	KIT proto-oncogene, receptor tyrosine kinase	-0.88		ISL2	ISL LIM homeobox 2	-0.55		HIPK1	homeodomain interacting protein kinase 1	0.31
KLC3	kinesin light chain 3	0.82		ITGB8	integrin subunit beta 8	-1.05		HIPK3	homeodomain interacting protein kinase 3	0.29
KLHDC2	kelch domain containing 2	0.32		ITM2C	integral membrane protein 2C	-0.48		HKDC1	hexokinase domain containing 1	-0.84
KLHDC7B	kelch domain containing 7B	-0.44		ITPRIPL1	ITPRIP like 1	0.52		HLA-G	major histocompatibility complex, class I, G	-1.93
KPTN	kaptin, actin binding protein	-0.47		JAKMIP2	janus kinase and microtubule interacting protein 2	0.62		HLA-K	major histocompatibility complex, class I, K (pseudogene)	-0.97
KRT1	keratin 1	1.06		JCHAIN	joining chain of multimeric IgA and IgM	-1.62		HMBS	hydroxymethylbilane synthase	0.51
KRT23	keratin 23	-0.88		KANSL1-AS1	KANSL1 antisense RNA 1	1.03		HNRNPA2B1	heterogeneous nuclear ribonucleoprotein A2/B1	0.3
KRT73-AS1	KRT73 antisense RNA 1	-1.11		KAT2B	lysine acetyltransferase 2B	0.49		HNRNPH3	heterogeneous nuclear ribonucleoprotein H3	0.46
LAIR2	leukocyte associated immunoglobulin like receptor 2	-0.95		KB_1027C114	--	0.96		HOOK3	hook microtubule tethering protein 3	0.27
LETM2	leucine zipper and EF-hand containing transmembrane protein 2	-0.5		KCTD3	potassium channel tetramerization domain containing 3	0.52		HP	haptoglobin	1.38
LGALS9	galectin 9	-0.47		KLC3	kinesin light chain 3	0.78		HPS1	HPS1 biogenesis of lysosomal organelles complex 3 subunit 1	0.47
LGALS12	galectin 12	-0.52		KLHL7	kelch like family member 7	0.27		HS2ST1	heparan sulfate 2-O-sulfotransferase 1	0.45
LGALS3BP	galectin 3 binding protein	-0.64		KRT1	keratin 1	0.91		HSD17B8	hydroxysteroid 17-beta dehydrogenase 8	-0.35
LGALS9C	galectin 9C	-1.25		KRT73-AS1	KRT73 antisense RNA 1	-1.47		HSD17B10	hydroxysteroid 17-beta dehydrogenase 10	-0.41
LGMN	legumain	-0.52		LAIR2	leukocyte associated immunoglobulin like receptor 2	-1.01		HSD17B12	hydroxysteroid 17-beta dehydrogenase 12	0.41
LINC01136	long intergenic non-protein coding RNA 1136	-0.6		LANCL2	LanC like 2	-0.28		HSH2D	hematopoietic SH2 domain containing	-0.45
LINC01619	long intergenic non-protein coding RNA 1619	-0.38		LDLRAP1	low density lipoprotein receptor adaptor protein 1	-0.39		HSPA1A/HSPA1B	heat shock protein family A (Hsp70) member 1A	1.08
LINC02033	--	-0.39		LEF1	lymphoid enhancer binding factor 1	-0.5		HSPBAP1	HSPB1 associated protein 1	0.28
LINC02084	--	0.65		LEF1-AS1	LEF1 antisense RNA 1	-0.73		ICAM2	intercellular adhesion molecule 2	-0.28
LINC02228	long intergenic non-protein coding RNA 2228	1.49		LGALS9	galectin 9	-0.45		IDH3B	isocitrate dehydrogenase (NAD(+)) 3 non-catalytic subunit beta	-0.23
LINC02289	long intergenic non-protein coding RNA 2289	-1.01		LGALS12	galectin 12	-0.65		IER3	immediate early response 3	-0.52
LINC02363	long intergenic non-protein coding RNA 2363	-0.66		LGALS3BP	galectin 3 binding protein	-0.77		IER5	immediate early response 5	-0.26
LINC02422	long intergenic non-protein coding RNA 2422	-0.81		LGALS9C	galectin 9C	-0.9		IFI6	interferon alpha inducible protein 6	-1.12
LOC729603	calcineurin like EF-hand protein 1 pseudogene	-0.42		LGMN	legumain	-0.5		IFI27	interferon alpha inducible protein 27	-1.17
LOC100130283	uncharacterized LOC100130283	-0.45		LIMS2	LIM zinc finger domain containing 2	-0.77		IFI44	interferon induced protein 44	-1.05
LOC100287036	uncharacterized LOC100287036	-0.88		LINC00211	long intergenic non-protein coding RNA 211	0.61		IFI44L	interferon induced protein 44 like	-1.22
LOC101928389	uncharacterized LOC101928389	-0.73		LINC00598	long intergenic non-protein coding RNA 598	-0.52		IFIT1	interferon induced protein with tetratricopeptide repeats 1	-1.41
LOC105372321	--	0.98		LINC00672	long intergenic non-protein coding RNA 672	0.38		IFIT2	interferon induced protein with tetratricopeptide repeats 2	-0.77
LOC105378645	--	0.36		LINC00989	long intergenic non-protein coding RNA 989	-0.63		IFNAR1	interferon alpha and beta receptor subunit 1	0.32
LRRN3	leucine rich repeat neuronal 3	-1.05		LINC01128	long intergenic non-protein coding RNA 1128	-0.35		IGF2BP2	insulin like growth factor 2 mRNA binding protein 2	0.75
LRWD1	leucine rich repeats and WD repeat domain containing 1	-0.46		LINC01303	long intergenic non-protein coding RNA 1303	-0.89		IGHA1	immunoglobulin heavy constant alpha 1	-1.13
LY6E	lymphocyte antigen 6 family member E	-1.17		LINC01684	--	0.8		IGHG1	immunoglobulin heavy constant gamma 1 (G1m marker)	-1.17
MACROD2	mono-ADP ribosylhydrolase 2	-1.25		LINC01963	long intergenic non-protein coding RNA 1963	-0.35		IGHG2	immunoglobulin heavy constant gamma 2 (G2m marker)	-1.13
MAP11	microtubule associated protein 11	-0.37		LINC02009	long intergenic non-protein coding RNA 2009	1.34		IGHG3	immunoglobulin heavy constant gamma 3 (G3m marker)	-0.99
MAP1LC3A	microtubule associated protein 1 light chain 3 alpha	-0.54		LINC02422	long intergenic non-protein coding RNA 2422	-0.63		IGHGP	immunoglobulin heavy constant gamma P (non-functional)	-1.64
MAP3K20	mitogen-activated protein kinase kinase kinase 20	0.38		LINC02470	long intergenic non-protein coding RNA 2470	2.38		IGHV5-51	immunoglobulin heavy variable 5-51	-0.75
MAST3	microtubule associated serine/threonine kinase 3	-0.42		LINGO2	leucine rich repeat and Ig domain containing 2	1.07		IGKC	immunoglobulin kappa constant	-0.96
MAST4	microtubule associated serine/threonine kinase family member 4	-0.35		LL0XNC01_237H12	--	0.46		IGKV1-6	immunoglobulin kappa variable 1-6	-1.8
MCM2	minichromosome maintenance complex component 2	-0.31		LMBR1	limb development membrane protein 1	0.28		IGKV1-9	immunoglobulin kappa variable 1-9	-0.94
MCOLN1	mucolipin 1	0.53		LMO4	LIM domain only 4	0.23		IGKV1-12	immunoglobulin kappa variable 1-12	-1.06
METTL9	methyltransferase like 9	0.42		LOC200772	uncharacterized LOC200772	-0.86		IGKV2-24	immunoglobulin kappa variable 2-24	-1.32
MGST1	microsomal glutathione S-transferase 1	0.53		LOC728975	uncharacterized LOC728975	-0.51		IGKV2-30	immunoglobulin kappa variable 2-30	-1.24
MGST3	microsomal glutathione S-transferase 3	0.33		LOC100128494	uncharacterized LOC100128494	-0.52		IGKV2D-29	immunoglobulin kappa variable 2D-29	-1.48
MINDY1	MINDY lysine 48 deubiquitinase 1	-0.42		LOC100287036	uncharacterized LOC100287036	-1.08		IGKV3-11	immunoglobulin kappa variable 3-11	-0.86
MIR29B2CHG	MIR29B2 and MIR29C host gene	-0.33		LOC105373780	proline-rich protein 18-like	0.53		IGKV3-20	immunoglobulin kappa variable 3-20	-1.07
MKRN4P	makorin ring finger protein 4, pseudogene	0.98		LPAL2	lipoprotein(a) like 2, pseudogene	0.54		IGLC2	immunoglobulin lambda constant 2	-1.11
MMACHC	metabolism of cobalamin associated C	-0.35		LRRN3	leucine rich repeat neuronal 3	-0.96		IGLV1-40	immunoglobulin lambda variable 1-40	-1.27
MMP8	matrix metallopeptidase 8	1.34		LRWD1	leucine rich repeats and WD repeat domain containing 1	-0.35		IGLV1-44	immunoglobulin lambda variable 1-44	-0.92
MOB3A	MOB kinase activator 3A	-0.4		LUC7L2	LUC7 like 2, pre-mRNA splicing factor	0.35		IGLV2-8	immunoglobulin lambda variable 2-8	-2.11
MS4A2	membrane spanning 4-domains A2	-1.26		LY6E	lymphocyte antigen 6 family member E	-0.98		IGLV3-21	immunoglobulin lambda variable 3-21	-1.05
MT-RNR2	l-rRNA	1.36		LYPLAL1	lysophospholipase like 1	0.52		IGLV3-25	immunoglobulin lambda variable 3-25	-1.28
MTHFD1L	methylenetetrahydrofolate dehydrogenase (NADP+ dependent) 1 like	-0.5		MACROD2	mono-ADP ribosylhydrolase 2	-1.25		IKBKE	inhibitor of nuclear factor kappa B kinase subunit epsilon	-0.28
MTX2	metaxin 2	0.47		MAP3K20	mitogen-activated protein kinase kinase kinase 20	0.35		IKZF5	IKAROS family zinc finger 5	0.43
MX1	MX dynamin like GTPase 1	-1.28		MAP4K5	mitogen-activated protein kinase kinase kinase kinase 5	0.3		IL23A	interleukin 23 subunit alpha	-0.65
MX2	MX dynamin like GTPase 2	-0.66		MAPK9	mitogen-activated protein kinase 9	0.24		IMPDH2	inosine monophosphate dehydrogenase 2	-0.26
MYO18B	myosin XVIIIB	2.22		MARVELD1	MARVEL domain containing 1	-0.49		INTS6	integrator complex subunit 6	0.29
MYO7B	myosin VIIB	-0.56		MAST4	microtubule associated serine/threonine kinase family member 4	-0.48		IRF7	interferon regulatory factor 7	-0.5
NADK	NAD kinase	-0.39		MBD5	methyl-CpG binding domain protein 5	0.27		ISCA1	iron-sulfur cluster assembly 1	0.63
NBPF1 (includes others)	NBPF member 11	-0.57		MCM9	minichromosome maintenance 9 homologous recombination repair factor	0.2		ISG15	ISG15 ubiquitin like modifier	-1.35
NBPF25P	NBPF member 25, pseudogene	0.81		MEOX1	mesenchyme homeobox 1	-0.83		ISG20	interferon stimulated exonuclease gene 20	-0.4
NCF1C	neutrophil cytosolic factor 1C pseudogene	-0.49		METTL9	methyltransferase like 9	0.45		ISOC2	isochorismatase domain containing 2	-0.5
NDE1	nudE neurodevelopment protein 1	-0.32		METTL15	methyltransferase like 15	0.35		ITGB7	integrin subunit beta 7	-0.35
NECTIN3	nectin cell adhesion molecule 3	0.74		MFSD9	major facilitator superfamily domain containing 9	0.44		ITGB8	integrin subunit beta 8	-1.46
NEIL2	nei like DNA glycosylase 2	0.43		MGST3	microsomal glutathione S-transferase 3	0.3		ITM2C	integral membrane protein 2C	-0.58
NEK3	NIMA related kinase 3	0.39		MKI67	marker of proliferation Ki-67	-0.36		ITSN2	intersectin 2	0.23
NEMP1	nuclear envelope integral membrane protein 1	-0.24		MMS22L	MMS22 like, DNA repair protein	0.33		JAKMIP2	janus kinase and microtubule interacting protein 2	0.59
NFXL1	nuclear transcription factor, X-box binding like 1	0.65		MMUT	methylmalonyl-CoA mutase	0.23		JAZF1	JAZF zinc finger 1	0.56
NINJ1	ninjurin 1	-0.41		MPO	myeloperoxidase	0.73		JCHAIN	joining chain of multimeric IgA and IgM	-1.11
NOS3	nitric oxide synthase 3	-0.58		MSMO1	methylsterol monooxygenase 1	0.49		KANK2	KN motif and ankyrin repeat domains 2	0.82
NOTCH1	notch receptor 1	-0.47		MTFMT	mitochondrial methionyl-tRNA formyltransferase	0.34		KANSL1	KAT8 regulatory NSL complex subunit 1	0.36
NRCAM	neuronal cell adhesion molecule	-1.23		MTHFD1	methylenetetrahydrofolate dehydrogenase, cyclohydrolase and formyltetrahydrofolate synthetase 1	-0.23		KANSL1-AS1	KANSL1 antisense RNA 1	0.96
NRG1	neuregulin 1	0.8		MTHFD1L	methylenetetrahydrofolate dehydrogenase (NADP+ dependent) 1 like	-0.58		KAT2B	lysine acetyltransferase 2B	0.65
NUB1	negative regulator of ubiquitin like proteins 1	-0.24		MTMR9	myotubularin related protein 9	0.21		KB_1027C114	--	0.91
NUDT1	nudix hydrolase 1	0.37		MX1	MX dynamin like GTPase 1	-1.03		KBTBD4	kelch repeat and BTB domain containing 4	-0.2
NUDT19	nudix hydrolase 19	0.19		MX2	MX dynamin like GTPase 2	-0.37		KCTD9	potassium channel tetramerization domain containing 9	0.4
OAS1	2'-5'-oligoadenylate synthetase 1	-0.81		MXI1	MAX interactor 1, dimerization protein	0.58		KDM8	lysine demethylase 8	-0.3
OAS2	2'-5'-oligoadenylate synthetase 2	-0.96		MYC	MYC proto-oncogene, bHLH transcription factor	-0.33		KIF22	kinesin family member 22	-0.27
OAS3	2'-5'-oligoadenylate synthetase 3	-1.51		MYLK	myosin light chain kinase	-0.64		KLC3	kinesin light chain 3	1.02
OASL	2'-5'-oligoadenylate synthetase like	-1.02		MYO6	myosin VI	0.9		KLHDC7B	kelch domain containing 7B	-0.65
OLR1	oxidized low density lipoprotein receptor 1	2.06		MYO18B	myosin XVIIIB	2.3		KLRC1	killer cell lectin like receptor C1	-0.75
OR51R1P	olfactory receptor family 51 subfamily R member 1 pseudogene	-0.9		MZB1	marginal zone B and B1 cell specific protein	-0.79		KPNA4	karyopherin subunit alpha 4	0.23
OR52K2	olfactory receptor family 52 subfamily K member 2	-1.05		NAF1	nuclear assembly factor 1 ribonucleoprotein	0.32		KRAS	KRAS proto-oncogene, GTPase	0.34
ORAI2	ORAI calcium release-activated calcium modulator 2	-0.4		NAP1L4P1	nucleosome assembly protein 1 like 4 pseudogene 1	0.3		KRT1	keratin 1	1.03
OTUD5	OTU deubiquitinase 5	-0.25		NAPB	NSF attachment protein beta	0.27		KRT73-AS1	KRT73 antisense RNA 1	-1.24
OVCH1-AS1	OVCH1 antisense RNA 1	1.21		NAPG	NSF attachment protein gamma	0.32		LAIR2	leukocyte associated immunoglobulin like receptor 2	-1.12
OXR1	oxidation resistance 1	0.32		NAT10	N-acetyltransferase 10	-0.3		LAMTOR5	late endosomal/lysosomal adaptor, MAPK and MTOR activator 5	0.28
P2RX7	purinergic receptor P2X 7	0.29		NEK3	NIMA related kinase 3	0.45		LCN2	lipocalin 2	1.1
P4HA1	prolyl 4-hydroxylase subunit alpha 1	0.28		NEK8	NIMA related kinase 8	-0.55		LDHB	lactate dehydrogenase B	-0.48
PABPC1L	poly(A) binding protein cytoplasmic 1 like	-0.34		NFIA	nuclear factor I A	0.49		LEPR	leptin receptor	0.52
PACS1	phosphofurin acidic cluster sorting protein 1	-0.36		NFXL1	nuclear transcription factor, X-box binding like 1	0.69		LFNG	LFNG O-fucosylpeptide 3-beta-N-acetylglucosaminyltransferase	-0.29
PACSIN2	protein kinase C and casein kinase substrate in neurons 2	-0.28		NHLRC3	NHL repeat containing 3	0.24		LGALS3	galectin 3	0.5
PADI2	peptidyl arginine deiminase 2	-0.63		NIPAL3	NIPA like domain containing 3	-0.28		LGALS9	galectin 9	-0.39
PAQR8	progestin and adipoQ receptor family member 8	-0.22		NMUR1	neuromedin U receptor 1	0.63		LGALS3BP	galectin 3 binding protein	-0.68
PARP10	poly(ADP-ribose) polymerase family member 10	-0.38		NOG	noggin	-0.92		LGALS9C	galectin 9C	-1.12
PARP12	poly(ADP-ribose) polymerase family member 12	-0.36		NOP56	NOP56 ribonucleoprotein	-0.26		LIMS2	LIM zinc finger domain containing 2	-0.94
PBXIP1	PBX homeobox interacting protein 1	-0.34		NOS3	nitric oxide synthase 3	-0.68		LIN52	lin-52 DREAM MuvB core complex component	-0.36
PCBP1-AS1	PCBP1 antisense RNA 1	-0.36		NOSIP	nitric oxide synthase interacting protein	-0.34		LIN7A	lin-7 homolog A, crumbs cell polarity complex component	0.52
PCBP3-OT1	--	-0.79		NPM3	nucleophosmin/nucleoplasmin 3	-0.45		LINC00211	long intergenic non-protein coding RNA 211	0.7
PCMT1	protein-L-isoaspartate (D-aspartate) O-methyltransferase	0.32		NR4A1	nuclear receptor subfamily 4 group A member 1	-0.59		LINC00467	long intergenic non-protein coding RNA 467	-0.49
PCSK1N	proprotein convertase subtilisin/kexin type 1 inhibitor	1.89		NRGN	neurogranin	-0.69		LINC00653	long intergenic non-protein coding RNA 653	-0.5
PDCD1LG2	programmed cell death 1 ligand 2	0.64		OAS1	2'-5'-oligoadenylate synthetase 1	-0.7		LINC01136	long intergenic non-protein coding RNA 1136	-0.49
PDCD4-AS1	PDCD4 antisense RNA 1	-0.53		OAS2	2'-5'-oligoadenylate synthetase 2	-0.79		LINC01891	long intergenic non-protein coding RNA 1891	-0.59
PDGFC	platelet derived growth factor C	0.47		OAS3	2'-5'-oligoadenylate synthetase 3	-1.12		LINC02009	long intergenic non-protein coding RNA 2009	1.12
PDLIM1	PDZ and LIM domain 1	-0.47		OASL	2'-5'-oligoadenylate synthetase like	-0.83		LINC02724	long intergenic non-protein coding RNA 2724	-0.45
PGAM4	phosphoglycerate mutase family member 4	-0.49		OLFM2	olfactomedin 2	-0.42		LMBR1	limb development membrane protein 1	0.31
PHEX	phosphate regulating endopeptidase homolog X-linked	-1.14		ORAI2	ORAI calcium release-activated calcium modulator 2	-0.36		LOC339874	uncharacterized LOC339874	0.49
PIK3CD	phosphatidylinositol-4,5-bisphosphate 3-kinase catalytic subunit delta	-0.38		OVCH1-AS1	OVCH1 antisense RNA 1	1.64		LOC100506585	uncharacterized LOC100506585	-0.53
PITPNA	phosphatidylinositol transfer protein alpha	-0.31		OXR1	oxidation resistance 1	0.39		LOC100996442	uncharacterized LOC100996442	2.3
PLAA	phospholipase A2 activating protein	0.22		OXSR1	oxidative stress responsive kinase 1	0.21		LOC101929698	uncharacterized LOC101929698	-0.84
PLBD1	phospholipase B domain containing 1	0.28		P2RX5	purinergic receptor P2X 5	-0.65		LOC107984036	uncharacterized LOC107984036	0.33
PLCXD1	phosphatidylinositol specific phospholipase C X domain containing 1	0.3		PAM	peptidylglycine alpha-amidating monooxygenase	0.5		LRATD2	LRAT domain containing 2	-0.25
PLIN4	perilipin 4	-0.69		PAQR8	progestin and adipoQ receptor family member 8	-0.25		LRRC37A15P	--	0.37
PLK3	polo like kinase 3	-0.35		PARP11-AS1	--	-0.88		LRRC37A3 (includes others)	leucine rich repeat containing 37 member A3	0.57
PML	promyelocytic leukemia	-0.39		PBDC1	polysaccharide biosynthesis domain containing 1	0.42		LRRFIP2	LRR binding FLII interacting protein 2	0.33
POLR1D	RNA polymerase I and III subunit D	0.38		PBX3	PBX homeobox 3	0.22		LRRN3	leucine rich repeat neuronal 3	-1.23
POLR2A	RNA polymerase II subunit A	-0.47		PCDHGA10	protocadherin gamma subfamily A, 10	0.63		LTF	lactotransferrin	1.24
POMGNT2	protein O-linked mannose N-acetylglucosaminyltransferase 2 (beta 1,4-)	0.53		PCDHGB6	protocadherin gamma subfamily B, 6	0.81		LY86	lymphocyte antigen 86	-0.38
PPCDC	phosphopantothenoylcysteine decarboxylase	-0.35		PCED1B	PC-esterase domain containing 1B	-0.34		LY6E	lymphocyte antigen 6 family member E	-1.22
PPFIBP2	PPFIA binding protein 2	-0.4		PCK2	phosphoenolpyruvate carboxykinase 2, mitochondrial	-0.26		LYPLA1	lysophospholipase 1	0.35
PPIAP22	peptidylprolyl isomerase A pseudogene 22	0.35		PCSK1N	proprotein convertase subtilisin/kexin type 1 inhibitor	1.02		MACROD2	mono-ADP ribosylhydrolase 2	-1.31
PPM1A	protein phosphatase, Mg2+/Mn2+ dependent 1A	0.44		PDCD4-AS1	PDCD4 antisense RNA 1	-0.5		MALAT1	metastasis associated lung adenocarcinoma transcript 1	0.32
PPP1R12B	protein phosphatase 1 regulatory subunit 12B	-0.5		PDCD6IPP2	PDCD6IP pseudogene 2	-0.73		MAP3K20	mitogen-activated protein kinase kinase kinase 20	0.5
PPP1R14BP3	protein phosphatase 1 regulatory inhibitor subunit 14B pseudogene 3	-0.4		PDE4A	phosphodiesterase 4A	-0.48		MAP4K5	mitogen-activated protein kinase kinase kinase kinase 5	0.3
PPP2R5B	protein phosphatase 2 regulatory subunit B'beta	0.49		PDE9A	phosphodiesterase 9A	-0.53		MAPK11	--	-0.49
PRANCR	progenitor renewal associated non-coding RNA	0.45		PDGFA	platelet derived growth factor subunit A	-0.74		MARCHF6	membrane associated ring-CH-type finger 6	0.27
PRDX1	peroxiredoxin 1	0.29		PDLIM1	PDZ and LIM domain 1	-0.52		MBD5	methyl-CpG binding domain protein 5	0.39
PRKCB	protein kinase C beta	-0.24		PEAR1	platelet endothelial aggregation receptor 1	-0.79		MBNL3	muscleblind like splicing regulator 3	0.59
PRKY	protein kinase Y-linked (pseudogene)	5.5		PGM2L1	phosphoglucomutase 2 like 1	0.54		MBTD1	mbt domain containing 1	0.27
PROSER2	proline and serine rich 2	-0.68		PHC1	polyhomeotic homolog 1	-0.53		MCAT	malonyl-CoA-acyl carrier protein transacylase	-0.4
PSME3	proteasome activator subunit 3	-0.29		PHEX	phosphate regulating endopeptidase homolog X-linked	-0.84		MCM3	minichromosome maintenance complex component 3	-0.24
PSMG3	proteasome assembly chaperone 3	0.41		PHLDA1	pleckstrin homology like domain family A member 1	0.63		MCOLN1	mucolipin 1	0.54
PTK2	protein tyrosine kinase 2	-0.43		PIAS2	protein inhibitor of activated STAT 2	0.31		ME3	malic enzyme 3	0.54
RAB12	RAB12, member RAS oncogene family	0.24		PIK3IP1	phosphoinositide-3-kinase interacting protein 1	-0.29		MED11	mediator complex subunit 11	-0.29
RAB20	RAB20, member RAS oncogene family	-0.42		PITPNM2	phosphatidylinositol transfer protein membrane associated 2	-0.46		MEF2C-AS1	MEF2C antisense RNA 1	0.44
RAB36	RAB36, member RAS oncogene family	-0.78		PKD1L3	polycystin 1 like 3, transient receptor potential channel interacting	0.69		MEG3	maternally expressed 3	1.06
RAB11FIP1	RAB11 family interacting protein 1	-0.45		PLEKHA5	pleckstrin homology domain containing A5	0.7		MEMO1	mediator of cell motility 1	0.6
RAP2A	RAP2A, member of RAS oncogene family	0.57		PLK3	polo like kinase 3	-0.27		MEOX1	mesenchyme homeobox 1	-0.66
RAPH1	Ras association (RalGDS/AF-6) and pleckstrin homology domains 1	0.43		PMEPA1	prostate transmembrane protein, androgen induced 1	-0.83		METTL9	methyltransferase like 9	0.44
RARA	retinoic acid receptor alpha	-0.45		PML	promyelocytic leukemia	-0.36		MFHAS1	malignant fibrous histiocytoma amplified sequence 1	0.27
RASSF5	Ras association domain family member 5	-0.26		POMC	proopiomelanocortin	-0.74		MFSD9	major facilitator superfamily domain containing 9	0.37
RBFA	ribosome binding factor A	-0.26		PPDPF	pancreatic progenitor cell differentiation and proliferation factor	-0.71		MICAL2	microtubule associated monooxygenase, calponin and LIM domain containing 2	0.41
RBX1	ring-box 1	0.37		PPFIBP2	PPFIA binding protein 2	-0.44		MINCR	MYC-induced long non-coding RNA	-0.39
RCSD1	RCSD domain containing 1	-0.26		PPIP5K2	diphosphoinositol pentakisphosphate kinase 2	0.39		MINDY2	MINDY lysine 48 deubiquitinase 2	0.33
REC8	REC8 meiotic recombination protein	-0.54		PPM1A	protein phosphatase, Mg2+/Mn2+ dependent 1A	0.48		mir-4477	microRNA 4477b	0.88
RHCE/RHD	Rh blood group D antigen	0.84		PRKCA	protein kinase C alpha	-0.43		MKS1	MKS transition zone complex subunit 1	-0.35
RHOU	ras homolog family member U	0.42		PRKY	protein kinase Y-linked (pseudogene)	5.19		MLLT11	MLLT11 transcription factor 7 cofactor	-0.49
RIOK3	RIO kinase 3	0.6		PRLR	prolactin receptor	0.76		MMP8	matrix metallopeptidase 8	1.82
RMI1	RecQ mediated genome instability 1	0.37		PRORSD1P	prolyl-tRNA synthetase associated domain containing 1, pseudogene	0.41		MOSPD1	motile sperm domain containing 1	0.43
RN7SL517P	RNA, 7SL, cytoplasmic 517, pseudogene	-0.39		PRR4	proline rich 4	0.36		MRPL10	mitochondrial ribosomal protein L10	-0.25
RNASE2	ribonuclease A family member 2	0.86		PRSS23	serine protease 23	0.63		MRPL17	mitochondrial ribosomal protein L17	-0.31
RNASE3	ribonuclease A family member 3	1.49		PRUNE1	prune exopolyphosphatase 1	-0.25		MRPL24	mitochondrial ribosomal protein L24	-0.41
RNF31	ring finger protein 31	-0.3		PTCRA	pre T cell antigen receptor alpha	-0.58		MRPL49	mitochondrial ribosomal protein L49	-0.22
RNF166	ring finger protein 166	-0.31		PTGDR2	prostaglandin D2 receptor 2	-0.67		MRPS12	mitochondrial ribosomal protein S12	-0.29
RNF187	ring finger protein 187	0.51		PTGDR	prostaglandin D2 receptor	0.61		MRPS21	mitochondrial ribosomal protein S21	-0.33
RNF213	ring finger protein 213	-0.5		PTGER2	prostaglandin E receptor 2	0.28		MRPS18A	mitochondrial ribosomal protein S18A	-0.25
RNF217	ring finger protein 217	0.66		PTK2	protein tyrosine kinase 2	-0.37		MRPS18B	mitochondrial ribosomal protein S18B	-0.36
RNLS	renalase, FAD dependent amine oxidase	0.49		PTPRS	protein tyrosine phosphatase receptor type S	-1.01		MS4A2	membrane spanning 4-domains A2	-1.33
RP11-468E2.4	--	-0.6		QPCTL	glutaminyl-peptide cyclotransferase like	-0.44		MS4A3	membrane spanning 4-domains A3	1.13
RP11-666A8.13	--	-0.79		RAB12	RAB12, member RAS oncogene family	0.34		MTCO3P11	--	0.46
RP11_10J212	--	-0.53		RAB20	RAB20, member RAS oncogene family	-0.57		MTND4P14	MT-ND4 pseudogene 14	0.71
RP11_120K193	--	-0.44		RAB11FIP2	RAB11 family interacting protein 2	0.32		MX1	MX dynamin like GTPase 1	-1.22
RP11_121C22	--	0.71		RAP2A	RAP2A, member of RAS oncogene family	0.67		MX2	MX dynamin like GTPase 2	-0.37
RP11_147I31	--	-0.39		RAVER2	ribonucleoprotein, PTB binding 2	0.4		MXI1	MAX interactor 1, dimerization protein	0.63
RP11_171I24	--	0.47		RBM44	RNA binding motif protein 44	0.47		MXRA7	matrix remodeling associated 7	0.74
RP11_174O33	--	-5.87		RCOR3	REST corepressor 3	0.21		MYO6	myosin VI	0.81
RP11_216L1319	--	0.44		REC8	REC8 meiotic recombination protein	-0.41		MYO18B	myosin XVIIIB	2.89
RP11_318K152	--	-0.6		RFC3	replication factor C subunit 3	0.3		MYO1B	myosin IB	0.92
RP11_320L112	--	-0.39		RFK	riboflavin kinase	0.42		MZB1	marginal zone B and B1 cell specific protein	-1.04
RP11_364L41	--	2.04		RHCE/RHD	Rh blood group D antigen	0.75		NABP1	nucleic acid binding protein 1	0.39
RP11_43D42	--	-0.65		RHEX	regulator of hemoglobinization and erythroid cell expansion	-0.44		NAPG	NSF attachment protein gamma	0.29
RP11_455F53	--	-0.76		RIOK3	RIO kinase 3	0.59		NAT9	N-acetyltransferase 9 (putative)	-0.28
RP11_455F56	--	-0.87		RMDN1	regulator of microtubule dynamics 1	0.25		NDC80	NDC80 kinetochore complex component	-0.5
RP11_50I192	--	-0.39		RN7SKP80	RN7SK pseudogene 80	-0.81		NDUFA2	NADH:ubiquinone oxidoreductase subunit A2	-0.38
RP11_54A42	--	-0.67		RNF17	ring finger protein 17	5.03		NDUFB9	NADH:ubiquinone oxidoreductase subunit B9	-0.27
RP11_555K122	--	-0.62		RNF170	ring finger protein 170	0.28		NDUFS5	NADH:ubiquinone oxidoreductase subunit S5	-0.67
RP11_678G144	--	-0.91		RNF213	ring finger protein 213	-0.32		NECAP2	NECAP endocytosis associated 2	-0.19
RP11_802E163	--	-0.36		RNF217	ring finger protein 217	0.6		NEDD4L	NEDD4 like E3 ubiquitin protein ligase	0.55
RP3_508I1514	--	-0.74		RNU1-27P	RNA, U1 small nuclear 27, pseudogene	-2.06		NEIL2	nei like DNA glycosylase 2	0.32
RP3_508I1521	--	-0.5		RNU6-1016P	--	0.5		NEURL1	neuralized E3 ubiquitin protein ligase 1	-0.44
RP4_575N62	--	-2.12		RP11-468E2.4	--	-0.41		NFAT5	nuclear factor of activated T cells 5	0.29
RP5_1041C103	--	-0.33		RP11-472I20.4	--	0.4		NFIA	nuclear factor I A	0.56
RP5_1126H102	--	-0.44		RP11_1094M147	--	0.54		NFXL1	nuclear transcription factor, X-box binding like 1	0.76
RP5_908M1410	--	-0.49		RP11_1102P223	--	-0.39		NHLRC2	NHL repeat containing 2	0.34
RPL15P18	ribosomal protein L15 pseudogene 18	2.66		RP11_1109F113	--	0.53		NME1	NME/NM23 nucleoside diphosphate kinase 1	-0.55
RPL23AP2	ribosomal protein L23a pseudogene 2	-1.28		RP11_121A81	--	0.49		NOG	noggin	-1.16
RPL23AP7	ribosomal protein L23a pseudogene 7	0.49		RP11_121C22	--	0.88		NOP56	NOP56 ribonucleoprotein	-0.28
RPL4P6	ribosomal protein L4 pseudogene 6	-0.44		RP11_16N112	--	0.54		NOS1AP	nitric oxide synthase 1 adaptor protein	1.76
RPL9P9	--	1.61		RP11_171I22	--	0.56		NOSIP	nitric oxide synthase interacting protein	-0.47
RPS20P10	ribosomal protein S20 pseudogene 10	-3.92		RP11_171I24	--	0.67		NPM3	nucleophosmin/nucleoplasmin 3	-0.49
RPS26P6	ribosomal protein S26 pseudogene 6	-1.48		RP11_174O33	--	-4.66		NRCAM	neuronal cell adhesion molecule	-0.97
RPS26P8	ribosomal protein S26 pseudogene 8	-1.85		RP11_197N188	--	-0.79		NRG1	neuregulin 1	0.75
RSAD2	radical S-adenosyl methionine domain containing 2	-1.47		RP11_214K320	--	0.77		NRL	neural retina leucine zipper	-0.56
RTCA	RNA 3'-terminal phosphate cyclase	0.21		RP11_262H145	--	0.61		NT5M	5',3'-nucleotidase, mitochondrial	0.82
RYR1	ryanodine receptor 1	-0.47		RP11_294J227	--	0.35		NUDT2	nudix hydrolase 2	-0.41
RYR3	ryanodine receptor 3	-1.12		RP11_348N57	--	0.37		NUDT4	nudix hydrolase 4	0.39
SAMD4B	sterile alpha motif domain containing 4B	-0.36		RP11_384C46	--	0.52		NUP93	nucleoporin 93	-0.23
SCAMP5	secretory carrier membrane protein 5	-0.76		RP11_421E142	--	0.4		NUTM2A-AS1	NUTM2A antisense RNA 1	0.43
SCAP	SREBF chaperone	-0.27		RP11_452D121	--	0.63		OAS1	2'-5'-oligoadenylate synthetase 1	-0.96
SCP2	sterol carrier protein 2	0.23		RP11_455F53	--	-0.58		OAS2	2'-5'-oligoadenylate synthetase 2	-0.8
SEC62	SEC62 homolog, preprotein translocation factor	0.5		RP11_455F56	--	-0.58		OAS3	2'-5'-oligoadenylate synthetase 3	-1.26
SEC14L1	SEC14 like lipid binding 1	-0.45		RP11_65L33	--	0.51		OASL	2'-5'-oligoadenylate synthetase like	-0.94
SELPLG	selectin P ligand	-0.28		RP11_65L34	--	0.47		OLR1	oxidized low density lipoprotein receptor 1	1.8
SEPTIN6	septin 6	-0.21		RP11_685N101	--	0.64		OVCH1-AS1	OVCH1 antisense RNA 1	1.69
SERPINB6	serpin family B member 6	0.24		RP11_690D193	--	0.49		OXSR1	oxidative stress responsive kinase 1	0.25
SERPINB10	serpin family B member 10	1.83		RP3_455J74	--	-0.47		P2RX7	purinergic receptor P2X 7	0.35
SERPING1	serpin family G member 1	-0.96		RP4_575N62	--	-2.31		PANK3	pantothenate kinase 3	0.34
SETD9	SET domain containing 9	0.61		RPL22P1	ribosomal protein L22 pseudogene 1	-0.68		PAQR8	progestin and adipoQ receptor family member 8	-0.32
SGMS2	sphingomyelin synthase 2	0.39		RPL23AP82	ribosomal protein L23a pseudogene 82	0.64		PARP10	poly(ADP-ribose) polymerase family member 10	-0.39
SHARPIN	SHANK associated RH domain interactor	0.53		RPL7P18	ribosomal protein L7 pseudogene 18	0.83		PARP12	poly(ADP-ribose) polymerase family member 12	-0.36
SHFL	shiftless antiviral inhibitor of ribosomal frameshifting	-0.33		RPS20P10	ribosomal protein S20 pseudogene 10	-3.63		PCBP2	poly(rC) binding protein 2	0.28
SHISA5	shisa family member 5	-0.37		RPS26P8	ribosomal protein S26 pseudogene 8	-1.86		PCSK1N	proprotein convertase subtilisin/kexin type 1 inhibitor	1.56
SIAH2	siah E3 ubiquitin protein ligase 2	0.54		RPS6KC1	ribosomal protein S6 kinase C1	0.27		PDIA4	protein disulfide isomerase family A member 4	-0.28
SIGLEC1	sialic acid binding Ig like lectin 1	-2.05		RSAD2	radical S-adenosyl methionine domain containing 2	-1.24		PDPK2P	3-phosphoinositide dependent protein kinase 2, pseudogene	-1.72
SIGLEC10	sialic acid binding Ig like lectin 10	-0.64		RXRB	retinoid X receptor beta	-0.22		PDZD8	PDZ domain containing 8	0.31
SKIDA1	SKI/DACH domain containing 1	-2.24		S100B	S100 calcium binding protein B	-1.86		PEAK1	pseudopodium enriched atypical kinase 1	0.3
SLC22A1	solute carrier family 22 member 1	-0.6		SCAPER	S-phase cyclin A associated protein in the ER	0.22		PEBP1	phosphatidylethanolamine binding protein 1	-0.33
SLC25A24	solute carrier family 25 member 24	0.31		SCP2	sterol carrier protein 2	0.2		PER3	period circadian regulator 3	0.53
SLC25A44	solute carrier family 25 member 44	-0.33		SEMA7A	semaphorin 7A (John Milton Hagen blood group)	-0.45		PES1	pescadillo ribosomal biogenesis factor 1	-0.21
SLC2A5	solute carrier family 2 member 5	0.87		SERAC1	serine active site containing 1	0.38		PEX16	peroxisomal biogenesis factor 16	-0.24
SLC45A3	solute carrier family 45 member 3	-1.02		SERF1A/SERF1B	small EDRK-rich factor 1A	1.26		PGM2L1	phosphoglucomutase 2 like 1	0.58
SLC9A8	solute carrier family 9 member A8	-0.37		SERPINB10	serpin family B member 10	1.16		PHB2	prohibitin 2	-0.26
SLFN11	schlafen family member 11	0.26		SGMS1-AS1	SGMS1 antisense RNA 1	0.26		PHEX	phosphate regulating endopeptidase homolog X-linked	-0.75
SLITRK4	SLIT and NTRK like family member 4	0.79		SH3TC2	SH3 domain and tetratricopeptide repeats 2	-0.72		PIK3IP1	phosphoinositide-3-kinase interacting protein 1	-0.35
SMAP2	small ArfGAP2	-0.39		SHISA5	shisa family member 5	-0.31		PINK1	PTEN induced kinase 1	0.5
SNHG22	small nucleolar RNA host gene 22	0.35		SHISAL2A	shisa like 2A	-0.45		PIWIL4	piwi like RNA-mediated gene silencing 4	0.47
SNORA53	small nucleolar RNA, H/ACA box 53	-1.23		SIAH2	siah E3 ubiquitin protein ligase 2	0.54		PKD1P5	polycystin 1, transient receptor potential channel interacting pseudogene 5	1.08
SNORD13	small nucleolar RNA, C/D box 13	0.98		SIGLEC1	sialic acid binding Ig like lectin 1	-2.09		PLAAT4	phospholipase A and acyltransferase 4	-0.38
SOCS6	suppressor of cytokine signaling 6	0.35		SIGLEC10	sialic acid binding Ig like lectin 10	-0.65		PLD4	phospholipase D family member 4	-0.5
SORL1	sortilin related receptor 1	-0.44		SIRPG	signal regulatory protein gamma	-0.53		PLEKHA3	pleckstrin homology domain containing A3	0.33
SP110	SP110 nuclear body protein	-0.33		SLA2	Src like adaptor 2	-0.36		PLEKHA8P1	pleckstrin homology domain containing A8 pseudogene 1	-0.36
SPAG1	sperm associated antigen 1	-0.51		SLC17A5	solute carrier family 17 member 5	0.24		PLXNB1	plexin B1	0.67
SPATS2L	spermatogenesis associated serine rich 2 like	-0.65		SLC22A23	solute carrier family 22 member 23	-0.43		PNPO	pyridoxamine 5'-phosphate oxidase	-0.32
SPIN4	spindlin family member 4	0.37		SLC25A36	solute carrier family 25 member 36	0.37		POC1B	POC1 centriolar protein B	0.44
SPRED1	sprouty related EVH1 domain containing 1	0.7		SLC2A5	solute carrier family 2 member 5	1.11		POLE3	DNA polymerase epsilon 3, accessory subunit	-0.26
SPTB	spectrin beta, erythrocytic	0.87		SLC2A13	solute carrier family 2 member 13	0.31		POLR1C	RNA polymerase I and III subunit C	-0.31
SRD5A1	steroid 5 alpha-reductase 1	0.22		SLC35E4	solute carrier family 35 member E4	-0.52		POP4	POP4 homolog, ribonuclease P/MRP subunit	-0.21
SREBF1	sterol regulatory element binding transcription factor 1	-0.42		SLC45A3	solute carrier family 45 member 3	-1.32		PPAN	peter pan homolog	-0.4
SSH2	slingshot protein phosphatase 2	-0.37		SLC9A3-AS1	SLC9A3 antisense RNA 1	-0.67		PPM1A	protein phosphatase, Mg2+/Mn2+ dependent 1A	0.59
SSPN	sarcospan	-0.9		SLCO4C1	solute carrier organic anion transporter family member 4C1	0.6		PPP1CB	protein phosphatase 1 catalytic subunit beta	0.75
SSTR3	somatostatin receptor 3	-0.7		SLITRK4	SLIT and NTRK like family member 4	1.03		PPP2R5B	protein phosphatase 2 regulatory subunit B'beta	0.43
ST6GALNAC2	ST6 N-acetylgalactosaminide alpha-2,6-sialyltransferase 2	-0.65		SMAD5	SMAD family member 5	0.33		PPP2R5E	--	0.33
STAT2	signal transducer and activator of transcription 2	-0.43		SMC1A	structural maintenance of chromosomes 1A	-0.27		PPP3CA	protein phosphatase 3 catalytic subunit alpha	0.35
STOM	stomatin	0.41		SMG1P4	SMG1 pseudogene 4	1.13		PPP3CB	protein phosphatase 3 catalytic subunit beta	0.37
STX11	syntaxin 11	-0.33		SMIM8	small integral membrane protein 8	0.32		PPP3R1	protein phosphatase 3 regulatory subunit B, alpha	0.45
SVBP	small vasohibin binding protein	0.42		SMURF2	SMAD specific E3 ubiquitin protein ligase 2	0.26		PRDM1	PR/SET domain 1	0.26
TACC3	transforming acidic coiled-coil containing protein 3	-0.33		SND1-IT1	SND1 intronic transcript 1	-0.55		PRDM2	PR/SET domain 2	0.25
TACSTD2	tumor associated calcium signal transducer 2	1.37		SNHG10	small nucleolar RNA host gene 10	0.35		PREB	prolactin regulatory element binding	-0.2
TAGAP	T cell activation RhoGTPase activating protein	-0.29		SNX3	sorting nexin 3	0.46		PRKY	protein kinase Y-linked (pseudogene)	5
TAP2	transporter 2, ATP binding cassette subfamily B member	-0.34		SOCS5	suppressor of cytokine signaling 5	0.34		PRLR	prolactin receptor	0.73
TARS1	threonyl-tRNA synthetase 1	0.2		SP110	SP110 nuclear body protein	-0.26		PRR13P5	proline rich 13 pseudogene 5	-0.49
TBC1D27P	TBC1 domain family member 27, pseudogene	-1.04		SPIN4	spindlin family member 4	0.5		PSMB5	proteasome 20S subunit beta 5	-0.22
TCAF1	TRPM8 channel associated factor 1	-0.58		SPNS3	sphingolipid transporter 3 (putative)	-0.46		PSME2	proteasome activator subunit 2	-0.4
TCEA1P2	transcription elongation factor A1 pseudogene 2	0.28		SPRED1	sprouty related EVH1 domain containing 1	0.65		PSME4	proteasome activator subunit 4	0.32
TFDP1	transcription factor Dp-1	0.44		SPTB	spectrin beta, erythrocytic	0.68		PTCH1	patched 1	0.52
TFEC	transcription factor EC	0.55		SRD5A1	steroid 5 alpha-reductase 1	0.3		PTGDR	prostaglandin D2 receptor	0.44
THNSL2	threonine synthase like 2	1.2		SREBF1	sterol regulatory element binding transcription factor 1	-0.45		PTGES3	prostaglandin E synthase 3	0.41
TLE3	TLE family member 3, transcriptional corepressor	-0.39		SSPN	sarcospan	-0.7		PTPN12	protein tyrosine phosphatase non-receptor type 12	0.36
TMCC1	transmembrane and coiled-coil domain family 1	-0.36		SSTR3	somatostatin receptor 3	-0.7		PUF60	poly(U) binding splicing factor 60	-0.2
TMEM43	transmembrane protein 43	-0.29		STAG3L1	stromal antigen 3-like 1 (pseudogene)	0.95		QPCTL	glutaminyl-peptide cyclotransferase like	-0.47
TMEM140	transmembrane protein 140	-0.43		STAT2	signal transducer and activator of transcription 2	-0.39		QSER1	glutamine and serine rich 1	0.28
TMEM183A	transmembrane protein 183A	0.25		STOM	stomatin	0.41		RAB20	RAB20, member RAS oncogene family	-0.56
TMTC2	transmembrane O-mannosyltransferase targeting cadherins 2	0.32		STON2	stonin 2	-0.69		RAB27A	RAB27A, member RAS oncogene family	0.39
TNFAIP8L1	TNF alpha induced protein 8 like 1	-0.34		SYNJ2	synaptojanin 2	-0.36		RAN	RAN, member RAS oncogene family	-0.26
TOR1B	torsin family 1 member B	-0.32		TACC3	transforming acidic coiled-coil containing protein 3	-0.31		RAP2A	RAP2A, member of RAS oncogene family	0.52
TP53INP2	tumor protein p53 inducible nuclear protein 2	-0.77		TACSTD2	tumor associated calcium signal transducer 2	1.38		RAPH1	Ras association (RalGDS/AF-6) and pleckstrin homology domains 1	0.7
TRAFD1	TRAF-type zinc finger domain containing 1	-0.27		TAF11	TATA-box binding protein associated factor 11	0.3		RASA4CP	RAS p21 protein activator 4C, pseudogene	-0.52
TRANK1	tetratricopeptide repeat and ankyrin repeat containing 1	-0.36		TAF13	TATA-box binding protein associated factor 13	0.6		RBM44	RNA binding motif protein 44	0.56
TRAV27	T cell receptor alpha variable 27	0.55		TAS2R19	taste 2 receptor member 19	0.46		RC3H1	ring finger and CCCH-type domains 1	0.24
TRAV13-1	T cell receptor alpha variable 13-1	-0.44		TCAF1	TRPM8 channel associated factor 1	0.56		RCOR3	REST corepressor 3	0.25
TRBV5-4	T cell receptor beta variable 5-4	-0.7		TEK	TEK receptor tyrosine kinase	1.24		REL	REL proto-oncogene, NF-kB subunit	0.23
TRBV7-2	T cell receptor beta variable 7-2	-0.52		THOC3	THO complex 3	-0.6		RFC4	replication factor C subunit 4	-0.37
TREM1	triggering receptor expressed on myeloid cells 1	-0.5		TM9SF1	transmembrane 9 superfamily member 1	-0.36		RFX3	regulatory factor X3	0.28
TREML2	triggering receptor expressed on myeloid cells like 2	-0.44		TMEM40	transmembrane protein 40	-0.68		RGS17P1	regulator of G protein signaling 17 pseudogene 1	0.28
TRGV10	T cell receptor gamma variable 10 (non-functional)	0.8		TMEM168	transmembrane protein 168	0.34		RHCE/RHD	Rh blood group D antigen	1.06
TRIM5	tripartite motif containing 5	-0.34		TMEM204	transmembrane protein 204	-0.44		RIMBP3 (includes others)	RIMS binding protein 3	-1.85
TRPM6	transient receptor potential cation channel subfamily M member 6	-0.47		TMEM268	transmembrane protein 268	-0.33		RIOK3	RIO kinase 3	0.72
TSC22D3	TSC22 domain family member 3	-0.36		TMEM229B	transmembrane protein 229B	-0.29		RN7SKP80	RN7SK pseudogene 80	1.34
TSPAN17	tetraspanin 17	0.28		TNFRSF13B	TNF receptor superfamily member 13B	-1.14		RN7SKP227	RN7SK pseudogene 227	-0.48
TSPEAR	thrombospondin type laminin G domain and EAR repeats	-1.24		TOP2A	DNA topoisomerase II alpha	-0.59		RNASE3	ribonuclease A family member 3	1.44
TSPO2	translocator protein 2	0.9		TP53	tumor protein p53	-0.28		RNASE6	ribonuclease A family member k6	-0.46
TSPOAP1-AS1	TSPOAP1, SUPT4H1 and RNF43 antisense RNA 1	-0.31		TPCN1	two pore segment channel 1	-0.42		RNF11	ring finger protein 11	0.75
TSTA3	tissue specific transplantation antigen P35B	0.71		TRAV24	T cell receptor alpha variable 24	2		RNF25	ring finger protein 25	-0.3
TTC9	tetratricopeptide repeat domain 9	-0.38		TRBV3-1	T cell receptor beta variable 3-1	-0.69		RNF114	ring finger protein 114	-0.2
TTC13	tetratricopeptide repeat domain 13	0.23		TRBV7-2	T cell receptor beta variable 7-2	-0.67		RNF217	ring finger protein 217	0.63
TTC26	tetratricopeptide repeat domain 26	-0.63		TRGV10	T cell receptor gamma variable 10 (non-functional)	0.75		RO60	Ro60, Y RNA binding protein	0.29
TTLL4	tubulin tyrosine ligase like 4	-0.4		TRIB2	tribbles pseudokinase 2	-0.26		RP11-734K23.9	--	1.73
TUBA4A	tubulin alpha 4a	-0.25		TRIM14	tripartite motif containing 14	-0.33		RP11-92K2.2	--	-0.69
TUFT1	tuftelin 1	-0.47		TRPC1	transient receptor potential cation channel subfamily C member 1	0.54		RP11_107E53	--	0.54
UBA1	ubiquitin like modifier activating enzyme 1	-0.3		TRPC6	transient receptor potential cation channel subfamily C member 6	-0.82		RP11_121A81	--	0.43
UBAC1	UBA domain containing 1	0.24		TSHZ2	teashirt zinc finger homeobox 2	-0.57		RP11_121C22	--	0.76
UBE2L6	ubiquitin conjugating enzyme E2 L6	-0.31		TSPAN18	tetraspanin 18	-0.52		RP11_153M75	--	0.57
UBN1	ubinuclein 1	-0.47		TSPOAP1-AS1	TSPOAP1, SUPT4H1 and RNF43 antisense RNA 1	-0.27		RP11_16E233	--	0.56
UBXN6	UBX domain protein 6	0.62		TSTA3	tissue specific transplantation antigen P35B	0.62		RP11_171I22	--	0.55
UNC13D	unc-13 homolog D	-0.31		TTBK2	tau tubulin kinase 2	0.17		RP11_171I24	--	0.6
UROS	uroporphyrinogen III synthase	0.2		TTC7B	tetratricopeptide repeat domain 7B	-0.53		RP11_171I25	--	0.72
USP11	ubiquitin specific peptidase 11	-0.29		TTN-AS1	TTN antisense RNA 1	0.5		RP11_174O33	--	-5.02
USP18	ubiquitin specific peptidase 18	-1.17		TXNDC5	thioredoxin domain containing 5	-0.69		RP11_206L102	--	0.83
USP19	ubiquitin specific peptidase 19	-0.27		UBA1	ubiquitin like modifier activating enzyme 1	-0.28		RP11_289I102	--	-0.5
VIL1	villin 1	-0.88		UBE2D4	ubiquitin conjugating enzyme E2 D4 (putative)	-0.38		RP11_290F246	--	0.52
VIPR1	vasoactive intestinal peptide receptor 1	-0.42		UBE2E3	ubiquitin conjugating enzyme E2 E3	0.27		RP11_358B237	--	0.34
VPS54	VPS54 subunit of GARP complex	0.28		UBE2L6	ubiquitin conjugating enzyme E2 L6	-0.36		RP11_362F192	--	0.79
WAS	WASP actin nucleation promoting factor	-0.42		UBIAD1	UbiA prenyltransferase domain containing 1	-0.3		RP11_380G52	--	0.87
WDFY4	WDFY family member 4	-0.37		UBOX5	U-box domain containing 5	-0.26		RP11_384C46	--	0.63
WLS	Wnt ligand secretion mediator	-0.66		URB1	URB1 ribosome biogenesis homolog	-0.32		RP11_421E142	--	0.42
WNT16	Wnt family member 16	-1.21		URB2	URB2 ribosome biogenesis homolog	-0.28		RP11_452G182	--	-0.71
XAF1	XIAP associated factor 1	-0.59		USP12	ubiquitin specific peptidase 12	0.48		RP11_455F53	--	-0.69
YBX3P1	Y-box binding protein 3 pseudogene 1	0.58		USP18	ubiquitin specific peptidase 18	-1.19		RP11_466H181	--	-0.92
YY1AP1	YY1 associated protein 1	0.26		VIPR1	vasoactive intestinal peptide receptor 1	-0.53		RP11_521I23	--	0.49
ZBED8	zinc finger BED-type containing 8	0.48		VPS45	vacuolar protein sorting 45 homolog	0.2		RP11_549J181	--	0.49
ZBP1	Z-DNA binding protein 1	-0.45		WAKMAR2	wound and keratinocyte migration associated lncRNA 2	-0.32		RP11_556I132	--	0.76
ZBTB32	zinc finger and BTB domain containing 32	-0.69		WDR35	WD repeat domain 35	0.37		RP11_61K93	--	-0.48
ZC3H12C	zinc finger CCCH-type containing 12C	0.44		WNT16	Wnt family member 16	-1.55		RP11_65L33	--	0.57
ZC3HAV1	zinc finger CCCH-type containing, antiviral 1	-0.27		XXbac-BPGBPG55C20.2	--	0.39		RP11_65L34	--	0.67
ZCCHC2	zinc finger CCHC-type containing 2	-0.56		YBX3	Y-box binding protein 3	0.46		RP11_727F1512	--	-0.49
ZDHHC18	zinc finger DHHC-type palmitoyltransferase 18	-0.38		ZADH2	zinc binding alcohol dehydrogenase domain containing 2	0.24		RP11_803D51	--	0.71
ZER1	zyg-11 related cell cycle regulator	0.43		ZBTB44	zinc finger and BTB domain containing 44	0.26		RP11_888D104	--	0.81
ZHX2	zinc fingers and homeoboxes 2	-0.26		ZC3H12C	zinc finger CCCH-type containing 12C	0.46		RP1_134E153	--	1
ZNF341	zinc finger protein 341	-0.35		ZC3HAV1	zinc finger CCCH-type containing, antiviral 1	-0.21		RP1_278E113	--	-1.15
ZNF552	zinc finger protein 552	-0.26		ZCCHC2	zinc finger CCHC-type containing 2	-0.4		RP1_80N23	--	0.81
ZNF621	zinc finger protein 621	0.17		ZDHHC2	zinc finger DHHC-type palmitoyltransferase 2	0.39		RP4_575N62	--	-3.04
ZNF667	zinc finger protein 667	-0.68		ZDHHC13	zinc finger DHHC-type palmitoyltransferase 13	0.27		RPA4	replication protein A4	0.45
ZNF814	zinc finger protein 814	-0.34		ZDHHC23	zinc finger DHHC-type palmitoyltransferase 23	0.42		RPE	ribulose-5-phosphate-3-epimerase	0.35
ZNF286A	zinc finger protein 286A	0.38		ZHX1	zinc fingers and homeoboxes 1	0.34		RPIA	ribose 5-phosphate isomerase A	0.57
ZNFX1	zinc finger NFX1-type containing 1	-0.37		ZNF25	zinc finger protein 25	0.38		RPL14	ribosomal protein L14	-0.36
				ZNF449	zinc finger protein 449	0.44		RPL18	ribosomal protein L18	-0.29
				ZNF680	zinc finger protein 680	0.6		RPL26	ribosomal protein L26	-0.97
				ZNF782	zinc finger protein 782	0.35		RPL31	ribosomal protein L31	-0.95
				ZNF839	zinc finger protein 839	-0.21		RPL32	ribosomal protein L32	-0.41
				ZNF280D	zinc finger protein 280D	0.35		RPL34	ribosomal protein L34	-1.06
				ZNF322P1	zinc finger protein 322 pseudogene 1	2.31		RPL36	ribosomal protein L36	-0.43
				ZNF658B	zinc finger protein 658B (pseudogene)	0.98		RPL37	ribosomal protein L37	-0.46
				ZNF702P	zinc finger protein 702, pseudogene	0.87		RPL10A	ribosomal protein L10a	-0.37
				ZNF876P	zinc finger protein 876, pseudogene	0.69		RPL10AP6	ribosomal protein L10a pseudogene 6	-0.51
				ZNFX1	zinc finger NFX1-type containing 1	-0.29		RPL13P12	ribosomal protein L13 pseudogene 12	-1.21
				ZNRF2	zinc and ring finger 2	0.27		RPL18AP3	ribosomal protein L18a pseudogene 3	-0.33
				ZRANB1	zinc finger RANBP2-type containing 1	0.27		RPL21P3	ribosomal protein L21 pseudogene 3	-1.1
				ZSCAN9	zinc finger and SCAN domain containing 9	0.27		RPL21P119	ribosomal protein L21 pseudogene 119	-3.44
								RPL22P1	ribosomal protein L22 pseudogene 1	-0.54
								RPL23A	ribosomal protein L23a	-0.31
								RPL23AP2	ribosomal protein L23a pseudogene 2	1.62
								RPL23AP42	ribosomal protein L23a pseudogene 42	-0.41
								RPL24P4	ribosomal protein L24 pseudogene 4	-0.59
								RPL36A	ribosomal protein L36a	0.36
								RPL37A	ribosomal protein L37a	-0.32
								RPN2	ribophorin II	-0.18
								RPP25	ribonuclease P and MRP subunit p25	-0.51
								RPS6	ribosomal protein S6	-0.55
								RPS8	ribosomal protein S8	-0.49
								RPS13	ribosomal protein S13	-0.4
								RPS19	ribosomal protein S19	-0.45
								RPS20	ribosomal protein S20	-0.52
								RPS23	ribosomal protein S23	-0.42
								RPS24	ribosomal protein S24	-0.73
								RPS25	ribosomal protein S25	-0.54
								RPS28	ribosomal protein S28	-0.42
								RPS15AP38	ribosomal protein S15a pseudogene 38	-1.53
								RPS20P10	ribosomal protein S20 pseudogene 10	-4.92
								RPS20P14	ribosomal protein S20 pseudogene 14	-0.73
								RPS27A	ribosomal protein S27a	-0.64
								RPS27AP16	ribosomal protein S27a pseudogene 16	-0.67
								RPS3AP38	RPS3A pseudogene 38	0.55
								RPS4X	ribosomal protein S4 X-linked	-0.38
								RRP9	ribosomal RNA processing 9, U3 small nucleolar RNA binding protein	-0.33
								RRP7A	ribosomal RNA processing 7 homolog A	-0.27
								RSAD2	radical S-adenosyl methionine domain containing 2	-1.56
								RUVBL1	RuvB like AAA ATPase 1	-0.25
								RWDD2A	RWD domain containing 2A	-0.56
								S100B	S100 calcium binding protein B	-1.72
								S1PR3	sphingosine-1-phosphate receptor 3	0.58
								SAE1	SUMO1 activating enzyme subunit 1	-0.31
								SBDSP1	SBDS pseudogene 1	-0.42
								SCN9A	sodium voltage-gated channel alpha subunit 9	0.76
								SEC62	SEC62 homolog, preprotein translocation factor	0.63
								SEC23B	SEC23 homolog B, COPII coat complex component	-0.17
								SERAC1	serine active site containing 1	0.33
								SERF1A/SERF1B	small EDRK-rich factor 1A	1.01
								SERPINB10	serpin family B member 10	1.94
								SERPINE2	serpin family E member 2	-0.91
								SESN3	sestrin 3	0.38
								SGMS2	sphingomyelin synthase 2	0.35
								SH3BGRL	SH3 domain binding glutamate rich protein like	0.39
								SH3GLB2	SH3 domain containing GRB2 like, endophilin B2	0.27
								SHARPIN	SHANK associated RH domain interactor	0.49
								SHFL	shiftless antiviral inhibitor of ribosomal frameshifting	-0.27
								SHMT2	serine hydroxymethyltransferase 2	-0.23
								SIAH2	siah E3 ubiquitin protein ligase 2	0.53
								SIGLEC1	sialic acid binding Ig like lectin 1	-1.66
								SIGLEC10	sialic acid binding Ig like lectin 10	-0.58
								SIGLEC16	sialic acid binding Ig like lectin 16 (gene/pseudogene)	-0.58
								SLC25A20	solute carrier family 25 member 20	0.34
								SLC25A37	solute carrier family 25 member 37	0.54
								SLC25A40	solute carrier family 25 member 40	0.37
								SLC2A5	solute carrier family 2 member 5	1.05
								SLC2A14	solute carrier family 2 member 14	1.09
								SLC30A4	solute carrier family 30 member 4	0.4
								SLC35A3	solute carrier family 35 member A3	0.38
								SLC35F5	solute carrier family 35 member F5	0.34
								SLC45A3	solute carrier family 45 member 3	-0.77
								SLCO4C1	solute carrier organic anion transporter family member 4C1	0.62
								SLIRP	SRA stem-loop interacting RNA binding protein	-0.46
								SLITRK4	SLIT and NTRK like family member 4	0.63
								SMIM8	small integral membrane protein 8	0.42
								SNAPIN	SNAP associated protein	-0.27
								SNHG8	small nucleolar RNA host gene 8	-0.85
								SNHG16	small nucleolar RNA host gene 16	-0.29
								SNORD13	small nucleolar RNA, C/D box 13	0.76
								SNRPB	small nuclear ribonucleoprotein polypeptides B and B1	-0.27
								SNTB1	syntrophin beta 1	0.22
								SNU13	small nuclear ribonucleoprotein 13	-0.29
								SNX3	sorting nexin 3	0.6
								SOS1-IT1	SOS1 intronic transcript 1	0.53
								SPATS2L	spermatogenesis associated serine rich 2 like	-0.59
								SPDYA	speedy/RINGO cell cycle regulator family member A	0.54
								SPIN4	spindlin family member 4	0.41
								SPRED1	sprouty related EVH1 domain containing 1	0.47
								SPTB	spectrin beta, erythrocytic	0.97
								SRPRB	SRP receptor subunit beta	-0.26
								SSTR3	somatostatin receptor 3	-0.77
								ST6GALNAC1	ST6 N-acetylgalactosaminide alpha-2,6-sialyltransferase 1	-0.84
								STAT2	signal transducer and activator of transcription 2	-0.4
								STMP1	short transmembrane mitochondrial protein 1	0.54
								STOM	stomatin	0.54
								STRADA	STE20 related adaptor alpha	0.28
								STRN	striatin	0.24
								SUCNR1	succinate receptor 1	0.97
								SWSAP1	SWIM-type zinc finger 7 associated protein 1	-0.33
								TAB3	TGF-beta activated kinase 1 (MAP3K7) binding protein 3	0.24
								TACSTD2	tumor associated calcium signal transducer 2	1.67
								TBL1XR1	TBL1X receptor 1	0.42
								TCN2	transcobalamin 2	-0.58
								TFDP1	transcription factor Dp-1	0.51
								TGFBR1	transforming growth factor beta receptor 1	0.33
								THNSL2	threonine synthase like 2	1.2
								TLCD4	TLC domain containing 4	0.77
								TLR5	toll like receptor 5	0.44
								TMBIM4	transmembrane BAX inhibitor motif containing 4	0.27
								TMED5	transmembrane p24 trafficking protein 5	0.38
								TMED7	transmembrane p24 trafficking protein 7	0.63
								TMEM101	transmembrane protein 101	-0.24
								TMEM165	transmembrane protein 165	0.27
								TMEM204	transmembrane protein 204	-0.5
								TMEM219	transmembrane protein 219	-0.25
								TMEM260	transmembrane protein 260	0.35
								TMEM170B	transmembrane protein 170B	0.61
								TMEM86A	transmembrane protein 86A	-0.59
								TMSB10/TMSB4X	thymosin beta 4 X-linked	-0.36
								TMTC2	transmembrane O-mannosyltransferase targeting cadherins 2	0.45
								TNFRSF25	TNF receptor superfamily member 25	-0.38
								TPI1P1	triosephosphate isomerase 1 pseudogene 1	-0.34
								TPTEP2	TPTE pseudogene 2	0.34
								TRAP1	TNF receptor associated protein 1	-0.33
								TRAPPC2L	trafficking protein particle complex 2 like	-0.33
								TRAPPC6A	trafficking protein particle complex 6A	-0.41
								TRAV4	T cell receptor alpha variable 4	-0.67
								TRAV5	T cell receptor alpha variable 5	-0.63
								TRAV27	T cell receptor alpha variable 27	0.81
								TRAV13-2	T cell receptor alpha variable 13-2	-0.58
								TRAV8-2	T cell receptor alpha variable 8-2	-0.54
								TRBV5-4	T cell receptor beta variable 5-4	-0.85
								TRBV7-2	T cell receptor beta variable 7-2	-0.73
								TRIB2	tribbles pseudokinase 2	-0.29
								TRIM58	tripartite motif containing 58	0.63
								TRPS1	transcriptional repressor GATA binding 1	0.26
								TSPEAR	thrombospondin type laminin G domain and EAR repeats	-1.02
								TSTA3	tissue specific transplantation antigen P35B	0.72
								TTBK2	tau tubulin kinase 2	0.19
								TTL	tubulin tyrosine ligase	0.18
								TTN-AS1	TTN antisense RNA 1	0.43
								TWSG1	twisted gastrulation BMP signaling modulator 1	0.44
								UBE2B	ubiquitin conjugating enzyme E2 B	0.51
								UBE2D1	ubiquitin conjugating enzyme E2 D1	0.56
								UBE2E3	ubiquitin conjugating enzyme E2 E3	0.3
								UBE2K	ubiquitin conjugating enzyme E2 K	0.32
								UBE2Q2P1	ubiquitin conjugating enzyme E2 Q2 pseudogene 1	0.62
								UBE2W	ubiquitin conjugating enzyme E2 W	0.46
								UGCG	UDP-glucose ceramide glucosyltransferase	0.4
								UHMK1	U2AF homology motif kinase 1	0.3
								UQCC3	ubiquinol-cytochrome c reductase complex assembly factor 3	-0.4
								URB2	URB2 ribosome biogenesis homolog	-0.26
								URM1	ubiquitin related modifier 1	-0.29
								USP12	ubiquitin specific peptidase 12	0.54
								USP18	ubiquitin specific peptidase 18	-1.41
								USP39	ubiquitin specific peptidase 39	-0.16
								UXT	ubiquitously expressed prefoldin like chaperone	-0.33
								VAMP4	vesicle associated membrane protein 4	0.43
								VCAN	versican	0.36
								VOPP1	VOPP1 WW domain binding protein	-0.22
								VSIG4	V-set and immunoglobulin domain containing 4	-0.68
								VSTM1	V-set and transmembrane domain containing 1	-0.65
								VTI1B	vesicle transport through interaction with t-SNAREs 1B	0.33
								WDFY2	WD repeat and FYVE domain containing 2	0.3
								WDR26	WD repeat domain 26	0.38
								WDR74	WD repeat domain 74	-0.23
								WHRN	whirlin	0.8
								WNT16	Wnt family member 16	-1.26
								XRCC6	X-ray repair cross complementing 6	-0.22
								YAF2	YY1 associated factor 2	0.29
								YBX3	Y-box binding protein 3	0.72
								YBX3P1	Y-box binding protein 3 pseudogene 1	0.77
								YOD1	YOD1 deubiquitinase	0.66
								ZBP1	Z-DNA binding protein 1	-0.44
								ZBTB44	zinc finger and BTB domain containing 44	0.33
								ZC3H12C	zinc finger CCCH-type containing 12C	0.67
								ZDHHC2	zinc finger DHHC-type palmitoyltransferase 2	0.48
								ZDHHC4	zinc finger DHHC-type palmitoyltransferase 4	-0.25
								ZEB2	zinc finger E-box binding homeobox 2	0.38
								ZER1	zyg-11 related cell cycle regulator	0.55
								ZMAT3	zinc finger matrin-type 3	0.33
								ZNF90	zinc finger protein 90	0.53
								ZNF101	zinc finger protein 101	-0.25
								ZNF304	zinc finger protein 304	-0.38
								ZNF425	zinc finger protein 425	-0.49
								ZNF543	zinc finger protein 543	-0.35
								ZNF101P2	zinc finger protein 101 pseudogene 2	0.54
								ZNHIT2	zinc finger HIT-type containing 2	-0.34
								ZRANB1	zinc finger RANBP2-type containing 1	0.35
