# Supplementary material for: The impact of physical frailty on the response to inactivated influenza vaccine in older adults
Source: Aging (Albany NY). 2020 Dec 9;12(24):24633–50. doi: 10.18632/aging.202207 (PMC7803506; doi:10.18632/aging.202207)
Supplement: Supplementary Table 2 [file aging-12-202207-s002.xls]

## Sheet: Sheet0
Supplemental Table 2
All differentially expressed genes between days 0 and 3 or 7 in Frail and Non-Frail patients.
Day 0-3 Frail				Day 0-3 Non-Frail				Day 0-7 Frail				Day 0-7 Non-Frail
Symbol	Entrez Gene Name	Expr Fold Change		Symbol	Entrez Gene Name	Expr Fold Change		Symbol	Entrez Gene Name	Expr Fold Change		Symbol	Entrez Gene Name	Expr Fold Change
ABHD17A	abhydrolase domain containing 17A, depalmitoylase	1.17		AB01944129	--	-1.282		7SK	--	-1.639		ABCC5	ATP binding cassette subfamily C member 5	-1.124
ABI3	ABI family member 3	1.24		ABHD16A	abhydrolase domain containing 16A, phospholipase	-1.163		ABCA13	ATP binding cassette subfamily A member 13	1.55		ABHD14B	abhydrolase domain containing 14B	1.13
AC0078795	--	1.33		AC0072782	--	-1.22		ABCC3	ATP binding cassette subfamily C member 3	1.43		ABT1	activator of basal transcription 1	1.13
AC0209511	--	1.17		AC1595401	--	2.91		ABCC13	ATP binding cassette subfamily C member 13 (pseudogene)	1.43		AC0031041	--	-1.25
AC0905874	--	1.25		AC010970.2	--	28.4		ABRACL	ABRA C-terminal like	-1.22		AC0051547	--	-1.19
AC1107693	--	1.34		ACE	angiotensin I converting enzyme	-1.37		ABTB2	ankyrin repeat and BTB domain containing 2	1.3		AC0072782	--	-1.299
AC107959.1	--	1.15		ACER2	alkaline ceramidase 2	1.27		AC0000893	--	-1.25		AC0076203	--	-1.205
ACAP2-IT1	ACAP2 intronic transcript 1	-1.562		ADGRG3	adhesion G protein-coupled receptor G3	-1.25		AC0078795	--	1.44		AC0079695	--	1.23
ADCY9	adenylate cyclase 9	1.15		ADGRG7	adhesion G protein-coupled receptor G7	-3.704		AC0104681	--	-1.695		AC0092453	--	1.38
ADGRG1	adhesion G protein-coupled receptor G1	1.28		AGER	advanced glycosylation end-product specific receptor	-1.333		AC0170022	--	1.4		AC0104681	--	1.95
ADGRG5	adhesion G protein-coupled receptor G5	1.2		AL1621513	--	1.51		AC0170352	--	1.28		AC0838993	--	1.78
AGAP1	ArfGAP with GTPase domain, ankyrin repeat and PH domain 1	1.22		AL8454721	--	-1.429		AC0187382	--	-1.695		AC0920661	--	-1.19
AGRN	agrin	1.38		ALPK3	alpha kinase 3	-1.316		AC0685224	--	-1.316		AC0926202	--	-1.22
AL1621513	--	2.25		ANKRD6	ankyrin repeat domain 6	-1.136		AC0905874	--	1.28		AC0934954	--	-1.149
ALKBH1	alkB homolog 1, histone H2A dioxygenase	1.14		ANKRD23	ankyrin repeat domain 23	1.18		AC1107693	--	1.45		AC1163666	--	-1.19
AP0003505	--	1.17		ANKRD39	ankyrin repeat domain 39	-1.205		AC1380352	--	1.42		AC1446521	--	1.32
AP1S3	adaptor related protein complex 1 subunit sigma 3	-1.25		ANKRD20A11P	ankyrin repeat domain 20 family member A11, pseudogene	-1.299		AC010970.2	--	-10		AC1595401	--	2.95
APOBEC3G	apolipoprotein B mRNA editing enzyme catalytic subunit 3G	1.12		AOC2	amine oxidase copper containing 2	-1.22		ACE	angiotensin I converting enzyme	1.31		AC010970.2	--	6.86
APOBEC3H	apolipoprotein B mRNA editing enzyme catalytic subunit 3H	1.38		AOC3	amine oxidase copper containing 3	-1.333		ACRBP	acrosin binding protein	1.31		ACE	angiotensin I converting enzyme	-1.351
ARHGEF5	Rho guanine nucleotide exchange factor 5	1.38		AP0005603	--	-1.333		ADGRE5	adhesion G protein-coupled receptor E5	1.23		ACP5	acid phosphatase 5, tartrate resistant	1.19
ARMC2	armadillo repeat containing 2	1.19		AP0062222	--	-1.389		AGAP5 (includes others)	ArfGAP with GTPase domain, ankyrin repeat and PH domain 5	1.19		ACP6	acid phosphatase 6, lysophosphatidic	-1.124
ARMCX4	armadillo repeat containing X-linked 4	-1.19		AP1S3	adaptor related protein complex 1 subunit sigma 3	-1.266		AGGF1P2	angiogenic factor with G-patch and FHA domains 1 pseudogene 2	-1.786		ACTBP8	ACTB pseudogene 8	-1.493
ARNTL2	aryl hydrocarbon receptor nuclear translocator like 2	-1.299		ARHGEF5	Rho guanine nucleotide exchange factor 5	-1.493		AHSP	alpha hemoglobin stabilizing protein	1.4		ACTL6A	actin like 6A	1.15
ARVCF	ARVCF delta catenin family member	1.22		ASCC1	activating signal cointegrator 1 complex subunit 1	1.13		AIMP1	aminoacyl tRNA synthetase complex interacting multifunctional protein 1	-1.19		ACYP1	acylphosphatase 1	-1.176
ASCL2	achaete-scute family bHLH transcription factor 2	1.26		ASRGL1	asparaginase and isoaspartyl peptidase 1	1.14		AL1332434	--	1.29		ADAMTSL4-AS1	ADAMTSL4 antisense RNA 1	-1.25
ATP1A3	ATPase Na+/K+ transporting subunit alpha 3	1.28		ATG2A	autophagy related 2A	-1.266		ALOX12	arachidonate 12-lipoxygenase, 12S type	1.55		ADCY10P1	ADCY10 pseudogene 1	-1.205
B3GALT2	beta-1,3-galactosyltransferase 2	-1.408		ATOH8	atonal bHLH transcription factor 8	-1.449		ANKMY2	ankyrin repeat and MYND domain containing 2	-1.149		ADGRG3	adhesion G protein-coupled receptor G3	-1.266
B3GAT1	beta-1,3-glucuronyltransferase 1	1.27		B3GNTL1	UDP-GlcNAc:betaGal beta-1,3-N-acetylglucosaminyltransferase like 1	-1.235		ANKRD13C	ankyrin repeat domain 13C	-1.149		ADSL	adenylosuccinate lyase	-1.163
BABAM2	BRISC and BRCA1 A complex member 2	1.18		BEND4	BEN domain containing 4	-1.299		ANKRD44-AS1	ANKRD44 antisense RNA 1	-1.389		AF1312153	--	-1.351
BAG3	BAG cochaperone 3	-1.176		BEX3	brain expressed X-linked 3	1.22		ANKRD44-IT1	ANKRD44 intronic transcript 1	1.25		AF1312154	--	-1.316
BAIAP2	BAR/IMD domain containing adaptor protein 2	1.2		BICDL2	BICD family like cargo adaptor 2	-1.786		ANO6	anoctamin 6	1.15		AGO4	argonaute RISC component 4	-1.136
BET1	Bet1 golgi vesicular membrane trafficking protein	-1.22		BLK	BLK proto-oncogene, Src family tyrosine kinase	-1.136		ANXA1	annexin A1	-1.316		AHSP	alpha hemoglobin stabilizing protein	1.34
BMP8B	bone morphogenetic protein 8b	1.29		BNC2	basonuclin 2	-1.22		AP0004373	--	1.29		AIF1	allograft inflammatory factor 1	1.32
BOK	BCL2 family apoptosis regulator BOK	1.31		BOLA2/BOLA2B	bolA family member 2	3.03		AP0009361	--	1.59		AKR1B1	aldo-keto reductase family 1 member B	1.11
BOLA2/BOLA2B	bolA family member 2	3.17		BRMS1L	BRMS1 like transcriptional repressor	-1.282		AP1S2	adaptor related protein complex 1 subunit sigma 2	-1.266		AKR7A2	aldo-keto reductase family 7 member A2	1.12
BSCL2	BSCL2 lipid droplet biogenesis associated, seipin	1.22		C3	complement C3	1.32		APOBR	apolipoprotein B receptor	1.25		AL8454721	--	-1.389
BTN2A3P	butyrophilin subfamily 2 member A3, pseudogene	1.17		C1QB	complement C1q B chain	1.44		APP	amyloid beta precursor protein	1.16		ALDH1B1	aldehyde dehydrogenase 1 family member B1	1.15
BTN3A1	butyrophilin subfamily 3 member A1	1.11		C4orf46	chromosome 4 open reading frame 46	-1.176		AQP1	aquaporin 1 (Colton blood group)	1.35		ALPK3	alpha kinase 3	-1.429
C10orf105	chromosome 10 open reading frame 105	1.25		C5orf17	chromosome 5 putative open reading frame 17	1.53		AQP10	aquaporin 10	1.65		ANAPC11	anaphase promoting complex subunit 11	1.22
C10orf88B	C10orf88B (pseudogene)	-1.25		C6orf3	--	-1.205		ARF1P2	ADP ribosylation factor 1 pseudogene 2	1.47		ANKHD1/ANKHD1-EIF4EBP3	ankyrin repeat and KH domain containing 1	-1.25
C11orf21	chromosome 11 open reading frame 21	1.14		CACNB4	calcium voltage-gated channel auxiliary subunit beta 4	-1.25		ARHGAP6	Rho GTPase activating protein 6	1.45		ANKRD9	ankyrin repeat domain 9	1.23
C13orf46	chromosome 13 open reading frame 46	1.25		CBX8	chromobox 8	-1.19		ARHGAP26-IT1	ARHGAP26 intronic transcript 1	1.27		ANKRD22	ankyrin repeat domain 22	1.55
C1orf115	chromosome 1 open reading frame 115	-1.205		CCDC61	coiled-coil domain containing 61	-1.163		ARHGEF28	Rho guanine nucleotide exchange factor 28	1.24		ANKRD39	ankyrin repeat domain 39	-1.163
C1orf220	chromosome 1 putative open reading frame 220	-1.205		CCDC89	coiled-coil domain containing 89	-1.282		ARNTL2	aryl hydrocarbon receptor nuclear translocator like 2	-1.389		ANKRD42	ankyrin repeat domain 42	-1.19
C1QA	complement C1q A chain	1.38		CCDC122	coiled-coil domain containing 122	-1.266		ASAP2	ArfGAP with SH3 domain, ankyrin repeat and PH domain 2	1.43		ANKRD20A11P	ankyrin repeat domain 20 family member A11, pseudogene	-1.389
C1QB	complement C1q B chain	1.41		CCL3L3	C-C motif chemokine ligand 3 like 3	1.36		ASMTL-AS1	ASMTL antisense RNA 1	1.56		ANKRD36BP2	ankyrin repeat domain 36B pseudogene 2	1.7
C4orf50	chromosome 4 open reading frame 50	1.29		CCNA2	cyclin A2	1.25		ATN1	atrophin 1	1.49		ANKRD44-IT1	ANKRD44 intronic transcript 1	-1.235
C5orf17	chromosome 5 putative open reading frame 17	-1.667		CCR12P	C-C motif chemokine receptor 12, pseudogene	1.32		ATP2B4	ATPase plasma membrane Ca2+ transporting 4	1.18		ANOS2P	anosmin 2, pseudogene	-1.852
CABLES2	Cdk5 and Abl enzyme substrate 2	1.16		CD19	CD19 molecule	-1.19		ATP5ME	ATP synthase membrane subunit e	-1.333		ANTKMT	adenine nucleotide translocase lysine methyltransferase	1.19
CAMLG	calcium modulating ligand	-1.149		CH17_258A224	--	-2.222		ATP5MPL	ATP synthase membrane subunit 6.8PL	-1.266		AOC2	amine oxidase copper containing 2	-1.266
CARMIL3	capping protein regulator and myosin 1 linker 3	1.32		CH507-513H4.3	--	25.16		ATP5PB	ATP synthase peripheral stalk-membrane subunit b	-1.149		AOC3	amine oxidase copper containing 3	-1.333
CARNS1	carnosine synthase 1	1.26		CH507-513H4.4	--	389.04		ATXN7L3B	ataxin 7 like 3B	-1.111		AP0005603	--	-1.429
CCDC152	coiled-coil domain containing 152	-1.333		CH507-513H4.5	--	17.35		AURKA	aurora kinase A	1.28		AP0019623	--	-1.25
CCNA2	cyclin A2	1.26		CH507-513H4.6	--	21.9		B3GALT2	beta-1,3-galactosyltransferase 2	-1.408		AP1S1	adaptor related protein complex 1 subunit sigma 1	1.16
CCND1	cyclin D1	-1.282		CHRNE	cholinergic receptor nicotinic epsilon subunit	-1.25		B3GNT9	UDP-GlcNAc:betaGal beta-1,3-N-acetylglucosaminyltransferase 9	-1.19		AP1S3	adaptor related protein complex 1 subunit sigma 3	-1.22
CD160	CD160 molecule	1.19		CHSY1	chondroitin sulfate synthase 1	-1.176		BABAM2	BRISC and BRCA1 A complex member 2	1.13		AP2S1	adaptor related protein complex 2 subunit sigma 1	1.16
CDHR1	cadherin related family member 1	1.32		CLCN4	chloride voltage-gated channel 4	-1.25		BAHCC1	BAH domain and coiled-coil containing 1	1.37		APBB1IP	amyloid beta precursor protein binding family B member 1 interacting protein	-1.19
CENPN	centromere protein N	-1.389		CLDND2	claudin domain containing 2	-1.299		BBS12	Bardet-Biedl syndrome 12	-1.282		APRT	adenine phosphoribosyltransferase	1.14
CH17_258A224	--	2.89		CLEC17A	C-type lectin domain containing 17A	-1.176		BCORL1	BCL6 corepressor like 1	1.27		ARHGAP19	Rho GTPase activating protein 19	-1.124
CHST13	carbohydrate sulfotransferase 13	1.22		COL4A4	collagen type IV alpha 4 chain	-1.316		BDH2	3-hydroxybutyrate dehydrogenase 2	-1.333		ARHGAP24	Rho GTPase activating protein 24	-1.149
CLDND2	claudin domain containing 2	1.22		COX5A	cytochrome c oxidase subunit 5A	1.14		BEND2	BEN domain containing 2	1.48		ARHGAP26	Rho GTPase activating protein 26	-1.205
CLEC17A	C-type lectin domain containing 17A	-1.205		CTAG2	cancer/testis antigen 2	-1.639		BFAR	bifunctional apoptosis regulator	-1.149		ARHGAP26-IT1	ARHGAP26 intronic transcript 1	-1.299
CMPK2	cytidine/uridine monophosphate kinase 2	1.17		CTB_139P112	--	-1.389		BLVRA	biliverdin reductase A	-1.19		ARHGAP27P1-BPTFP1-KPNA2P3	--	-1.205
CNIH1	cornichon family AMPA receptor auxiliary protein 1	-1.22		CTC_137K31	--	-1.235		BMP6	bone morphogenetic protein 6	1.35		ARHGEF5	Rho guanine nucleotide exchange factor 5	-1.37
CNTNAP3	contactin associated protein family member 3	1.27		CTU1	cytosolic thiouridylase subunit 1	1.24		BNIP1	BCL2 interacting protein 1	-1.235		ARHGEF17	Rho guanine nucleotide exchange factor 17	-1.667
CNTNAP3C	contactin associated protein family member 3C	1.6		CYP2T1P	cytochrome P450 family 2 subfamily T member 1, pseudogene	-1.22		BOLA2/BOLA2B	bolA family member 2	4.03		ARMCX6	armadillo repeat containing X-linked 6	1.17
COL4A4	collagen type IV alpha 4 chain	-1.25		CYP4F3	cytochrome P450 family 4 subfamily F member 3	-1.22		BPI	bactericidal permeability increasing protein	1.24		ASB13	ankyrin repeat and SOCS box containing 13	1.17
COL6A2	collagen type VI alpha 2 chain	1.21		DHCR24	24-dehydrocholesterol reductase	1.2		BTBD19	BTB domain containing 19	1.37		ASCL2	achaete-scute family bHLH transcription factor 2	1.27
COLGALT2	collagen beta(1-O)galactosyltransferase 2	1.28		DHRS11	dehydrogenase/reductase 11	1.23		BZW2	basic leucine zipper and W2 domains 2	-1.163		ASXL2	ASXL transcriptional regulator 2	-1.124
COLQ	collagen like tail subunit of asymmetric acetylcholinesterase	1.19		DIABLO	diablo IAP-binding mitochondrial protein	-1.124		C10orf105	chromosome 10 open reading frame 105	1.32		ATF3	activating transcription factor 3	1.45
COMMD3	COMM domain containing 3	-1.22		DLG2	discs large MAGUK scaffold protein 2	-1.19		C10orf88B	C10orf88B (pseudogene)	-1.266		ATG101	autophagy related 101	1.14
CORO6	coronin 6	1.37		DLGAP2	DLG associated protein 2	-2.564		C12orf43	chromosome 12 open reading frame 43	-1.176		ATG2B	autophagy related 2B	-1.099
CRYBG2	crystallin beta-gamma domain containing 2	-1.351		DTX4	deltex E3 ubiquitin ligase 4	-1.136		C12orf57	chromosome 12 open reading frame 57	-1.235		ATP11A	ATPase phospholipid transporting 11A	-1.19
CTC_459F41	--	-1.19		EBF1	EBF transcription factor 1	-1.22		C13orf46	chromosome 13 open reading frame 46	1.28		ATP5F1A	ATP synthase F1 subunit alpha	1.12
CTD_2587H2414	--	1.32		ECHDC3	enoyl-CoA hydratase domain containing 3	1.27		C19orf48	chromosome 19 open reading frame 48	-1.163		ATP5F1B	ATP synthase F1 subunit beta	1.11
CTSG	cathepsin G	1.39		EEF1A1P11	eukaryotic translation elongation factor 1 alpha 1 pseudogene 11	-1.449		C1orf35	chromosome 1 open reading frame 35	-1.19		ATP5F1E	ATP synthase F1 subunit epsilon	1.34
CTSW	cathepsin W	1.18		ELAPOR1	endosome-lysosome associated apoptosis and autophagy regulator 1	-1.25		C1orf115	chromosome 1 open reading frame 115	-1.333		ATP5MC1	ATP synthase membrane subunit c locus 1	1.22
CX3CR1	C-X3-C motif chemokine receptor 1	1.15		EPB41L4A	erythrocyte membrane protein band 4.1 like 4A	-1.163		C1orf198	chromosome 1 open reading frame 198	1.35		ATP5MD	ATP synthase membrane subunit DAPIT	1.31
CYCS	cytochrome c, somatic	-1.205		F8A1 (includes others)	coagulation factor VIII associated 1	-3.226		C22orf34	chromosome 22 open reading frame 34	1.2		ATP5ME	ATP synthase membrane subunit e	1.32
CYP2D8P	ccytochrome P450 family 2 subfamily D member 8, pseudogene	1.36		FAAP24	FA core complex associated protein 24	1.22		C2orf88	chromosome 2 open reading frame 88	1.35		ATP5MF	ATP synthase membrane subunit f	1.2
CYTH3	cytohesin 3	1.12		FAIM	Fas apoptotic inhibitory molecule	1.23		C5orf17	chromosome 5 putative open reading frame 17	-2.564		ATP5MG	ATP synthase membrane subunit g	1.2
DAAM2	dishevelled associated activator of morphogenesis 2	1.55		FAM71F2	family with sequence similarity 71 member F2	-1.316		CA1	carbonic anhydrase 1	1.41		ATP5PB	ATP synthase peripheral stalk-membrane subunit b	1.21
DAGLA	diacylglycerol lipase alpha	1.32		FAM89B	family with sequence similarity 89 member B	1.16		CA2	carbonic anhydrase 2	1.45		ATP5PD	ATP synthase peripheral stalk subunit d	1.16
DDX11L10	DEAD/H-box helicase 11 like 10 (pseudogene)	1.37		FBLN2	fibulin 2	-1.299		CA13	carbonic anhydrase 13	1.21		ATP5PO	ATP synthase peripheral stalk subunit OSCP	1.22
DEFA4	defensin alpha 4	1.29		FBN1	fibrillin 1	-1.351		CABLES2	Cdk5 and Abl enzyme substrate 2	1.17		ATP6V1F	ATPase H+ transporting V1 subunit F	1.14
DEFA1 (includes others)	defensin alpha 1	1.32		FCER2	Fc fragment of IgE receptor II	-1.136		CALD1	caldesmon 1	1.41		ATRAID	all-trans retinoic acid induced differentiation factor	1.17
DIP2A	disco interacting protein 2 homolog A	1.12		FCGR1A	Fc fragment of IgG receptor Ia	1.26		CAMP	cathelicidin antimicrobial peptide	1.23		ATXN7	ataxin 7	-1.136
DLG5	discs large MAGUK scaffold protein 5	1.22		FCRL2	Fc receptor like 2	-1.163		CAPN3	calpain 3	1.25		AVIL	advillin	-1.205
DOC2GP	double C2 domain gamma, pseudogene	1.32		FCRLA	Fc receptor like A	-1.176		CARD8-AS1	CARD8 antisense RNA 1	-1.19		B3GALT6	beta-1,3-galactosyltransferase 6	1.14
DPY19L1P1	DPY19L1 pseudogene 1	-1.471		FIZ1	FLT3 interacting zinc finger 1	-1.163		CATSPER2	cation channel sperm associated 2	1.31		B3GNTL1	UDP-GlcNAc:betaGal beta-1,3-N-acetylglucosaminyltransferase like 1	-1.25
DRAXIN	dorsal inhibitory axon guidance protein	1.22		FOLR3	folate receptor gamma	-1.266		CAVIN2	caveolae associated protein 2	1.4		BABAM1	BRISC and BRCA1 A complex member 1	1.21
DSP	desmoplakin	-1.316		FTH1P20	ferritin heavy chain 1 pseudogene 20	1.23		CBX3P2	chromobox 3 pseudogene 2	-1.282		BACH2	BTB domain and CNC homolog 2	-1.124
DUSP5	dual specificity phosphatase 5	1.14		GBP6	guanylate binding protein family member 6	1.29		CCDC59	coiled-coil domain containing 59	-1.205		BAG1	BAG cochaperone 1	1.18
EDARADD	EDAR associated death domain	-1.19		GSTM1	glutathione S-transferase mu 1	1.32		CCDC163	coiled-coil domain containing 163	1.33		BATF3	basic leucine zipper ATF-like transcription factor 3	1.28
EEF1A1P11	eukaryotic translation elongation factor 1 alpha 1 pseudogene 11	-1.408		GTF2I	general transcription factor IIi	1.16		CCDC191	coiled-coil domain containing 191	-1.136		BCL2A1	BCL2 related protein A1	1.47
EEF1DP2	eukaryotic translation elongation factor 1 delta pseudogene 2	1.23		H2AC4	H2A clustered histone 4	1.23		CCR5	C-C motif chemokine receptor 5 (gene/pseudogene)	-1.124		BEND4	BEN domain containing 4	-1.22
EEF1DP7	eukaryotic translation elongation factor 1 delta pseudogene 7	1.2		H2AC12	H2A clustered histone 12	1.21		CD2	CD2 molecule	-1.163		BEX3	brain expressed X-linked 3	1.22
EHHADH	enoyl-CoA hydratase and 3-hydroxyacyl CoA dehydrogenase	-1.266		H2AC14	H2A clustered histone 14	1.43		CD24	CD24 molecule	1.24		BICDL2	BICD family like cargo adaptor 2	-1.587
EID1	EP300 interacting inhibitor of differentiation 1	-1.205		H2AC18/H2AC19	H2A clustered histone 18	5.41		CD48	CD48 molecule	-1.19		BLVRA	biliverdin reductase A	1.22
ELAPOR1	endosome-lysosome associated apoptosis and autophagy regulator 1	1.27		H2BC4	H2B clustered histone 4	1.12		CD52	CD52 molecule	-1.282		BLVRB	biliverdin reductase B	1.2
ELAPOR2	endosome-lysosome associated apoptosis and autophagy regulator family member 2	-1.235		H2BC6	H2B clustered histone 6	1.14		CD1C	CD1c molecule	-1.22		BRWD3	bromodomain and WD repeat domain containing 3	-1.149
EOMES	eomesodermin	1.12		H2BC11	H2B clustered histone 11	1.15		CD99P1	CD99 molecule pseudogene 1	1.2		BTF3	basic transcription factor 3	1.17
EPB41L4A-AS1	EPB41L4A antisense RNA 1	-1.163		H2BC14	H2B clustered histone 14	1.28		CDC42-IT1	CDC42 intronic transcript 1	1.27		BYSL	bystin like	1.22
EPS8	epidermal growth factor receptor pathway substrate 8	1.2		H2BU1	H2B.U histone 1	1.2		CDHR1	cadherin related family member 1	1.26		C12orf57	chromosome 12 open reading frame 57	1.26
ERBB2	erb-b2 receptor tyrosine kinase 2	1.23		H3C8	H3 clustered histone 8	1.35		CDK8	cyclin dependent kinase 8	1.13		C1orf43	chromosome 1 open reading frame 43	1.12
EVA1C	eva-1 homolog C	1.22		H3C10	H3 clustered histone 10	1.19		CDKN1A	cyclin dependent kinase inhibitor 1A	1.23		C1orf220	chromosome 1 putative open reading frame 220	-1.205
EVC2	EvC ciliary complex subunit 2	-1.282		H3C12	H3 clustered histone 12	1.21		CDKN2AIP	CDKN2A interacting protein	-1.176		C1QB	complement C1q B chain	1.38
FADS2	fatty acid desaturase 2	1.17		H4C14	H4 clustered histone 14	12.05		CDS2	CDP-diacylglycerol synthase 2	1.13		C1QBP	complement C1q binding protein	1.22
FAM110A	family with sequence similarity 110 member A	1.17		H4C15	H4 clustered histone 15	4.21		CEACAM6	CEA cell adhesion molecule 6	1.33		C5orf17	chromosome 5 putative open reading frame 17	1.39
FAM110C	family with sequence similarity 110 member C	-1.266		HBM	hemoglobin subunit mu	1.28		CEACAM8	CEA cell adhesion molecule 8	1.57		C8orf37	chromosome 8 open reading frame 37	-1.22
FAM157A/FAM157B	family with sequence similarity 157 member A	1.45		HCFC1R1	host cell factor C1 regulator 1	-1.235		CEBPG	CCAAT enhancer binding protein gamma	-1.136		C9orf16	chromosome 9 open reading frame 16	1.16
FAM189B	family with sequence similarity 189 member B	1.23		HECW2-AS1	HECW2 antisense RNA 1	1.32		CELSR2	cadherin EGF LAG seven-pass G-type receptor 2	1.27		C9orf78	chromosome 9 open reading frame 78	1.16
FASLG	Fas ligand	1.2		HELLPAR	HELLP associated long non-coding RNA	-1.754		CEP295NL	CEP295 N-terminal like	1.36		CABP5	calcium binding protein 5	1.37
FCER1A	Fc fragment of IgE receptor Ia	-1.25		HLA-G	major histocompatibility complex, class I, G	1.28		CETN3	centrin 3	-1.316		CACNA1D	calcium voltage-gated channel subunit alpha1 D	-1.205
FCF1	FCF1 rRNA-processing protein	-1.176		HLA-K	major histocompatibility complex, class I, K (pseudogene)	-1.389		CFAP45	cilia and flagella associated protein 45	1.34		CACNB4	calcium voltage-gated channel auxiliary subunit beta 4	-1.37
FCGR2C	Fc fragment of IgG receptor IIc (gene/pseudogene)	1.15		HOXB3	homeobox B3	-1.25		CFAP161	cilia and flagella associated protein 161	1.41		CACYBP	calcyclin binding protein	1.18
FCRL2	Fc receptor like 2	-1.19		HS3ST1	heparan sulfate-glucosamine 3-sulfotransferase 1	-1.235		CH17_189H201	--	1.37		CALD1	caldesmon 1	-1.299
FCRL6	Fc receptor like 6	1.23		HS6ST1P1	heparan sulfate 6-O-sulfotransferase 1 pseudogene 1	-1.667		CH507-513H4.3	--	-14.286		CALHM6	calcium homeostasis modulator family member 6	1.48
FCRLA	Fc receptor like A	-1.176		HSPA1A/HSPA1B	heat shock protein family A (Hsp70) member 1A	-1.471		CH507-513H4.4	--	-14.286		CAP2P1	cyclase associated actin cytoskeleton regulatory protein 2 pseudogene 1	-1.282
FNBP1P1	formin binding protein 1 pseudogene 1	-1.389		IDO1	indoleamine 2,3-dioxygenase 1	1.32		CH507-513H4.5	--	-5.882		CARD8	caspase recruitment domain family member 8	-1.111
FSTL3	follistatin like 3	1.25		IFI27	interferon alpha inducible protein 27	1.38		CH507-513H4.6	--	-6.25		CBWD3/CBWD6	COBW domain containing 3	-1.316
GATD3A/GATD3B	glutamine amidotransferase like class 1 domain containing 3A	-3.704		IGFBP2	insulin like growth factor binding protein 2	1.33		CHCHD1	coiled-coil-helix-coiled-coil-helix domain containing 1	-1.235		CCDC13	coiled-coil domain containing 13	-1.235
GDPD3	glycerophosphodiester phosphodiesterase domain containing 3	1.24		IGFBP4	insulin like growth factor binding protein 4	1.27		CHPT1	choline phosphotransferase 1	1.2		CCDC51	coiled-coil domain containing 51	1.19
GFI1	growth factor independent 1 transcriptional repressor	1.15		IGHD	immunoglobulin heavy constant delta	-1.205		CHRNA10	cholinergic receptor nicotinic alpha 10 subunit	1.21		CCDC85B	coiled-coil domain containing 85B	1.24
GFOD1	glucose-fructose oxidoreductase domain containing 1	1.14		IGHV3-7	immunoglobulin heavy variable 3-7	1.36		CHRNB1	cholinergic receptor nicotinic beta 1 subunit	-1.22		CCL3	C-C motif chemokine ligand 3	1.26
GHRL	ghrelin and obestatin prepropeptide	1.21		IGKV1-27	immunoglobulin kappa variable 1-27	-1.408		CIAO2A	cytosolic iron-sulfur assembly component 2A	-1.299		CCN3	cellular communication network factor 3	-1.19
GIPR	gastric inhibitory polypeptide receptor	1.26		IGKV2-28	immunoglobulin kappa variable 2-28	2.27		CISD2	CDGSH iron sulfur domain 2	1.2		CCNA2	cyclin A2	1.23
GLRX2	glutaredoxin 2	-1.176		IRAG1-AS1	IRAG1 antisense RNA 1	-1.19		CIT	citron rho-interacting serine/threonine kinase	1.3		CCNB1	cyclin B1	1.54
GNLY	granulysin	1.24		ITGA10	integrin subunit alpha 10	-1.205		CLCN2	chloride voltage-gated channel 2	1.24		CCNB1IP1	cyclin B1 interacting protein 1	1.2
GOLGA6L9 (includes others)	golgin A6 family like 9	-1.37		KCND1	potassium voltage-gated channel subfamily D member 1	-1.613		CLDN5	claudin 5	1.59		CCT3	chaperonin containing TCP1 subunit 3	1.12
GOLGA8K (includes others)	golgin A8 family member K	1.35		KCNMA1	potassium calcium-activated channel subfamily M alpha 1	-1.408		CLDND2	claudin domain containing 2	1.16		CCT4	chaperonin containing TCP1 subunit 4	1.18
GOLGA8Q	golgin A8 family member Q	1.68		KIR2DS2 (includes others)	killer cell immunoglobulin like receptor, two Ig domains and short cytoplasmic tail 2	1.22		CLEC1A	C-type lectin domain family 1 member A	1.29		CCT5	chaperonin containing TCP1 subunit 5	1.12
GPR34	G protein-coupled receptor 34	-1.282		KPNA2	karyopherin subunit alpha 2	1.12		CLEC1B	C-type lectin domain family 1 member B	1.46		CD63	CD63 molecule	1.12
GPR35	G protein-coupled receptor 35	1.34		KPTN	kaptin, actin binding protein	-1.19		CLEC2L	C-type lectin domain family 2 member L	1.49		CD99P1	CD99 molecule pseudogene 1	-1.22
GS1_184P142	--	-25		KRT77	keratin 77	-4		CLEC6A	C-type lectin domain containing 6A	-1.316		CDC26	cell division cycle 26	1.18
H2AC18/H2AC19	H2A clustered histone 18	-10		LERFS	lncRNA negative regulator of fibroblast-like synoviocyte migration, SYNCRIP interacting	-1.538		CLU	clusterin	1.51		CDC34	cell division cycle 34, ubiqiutin conjugating enzyme	1.17
H2BC13	H2B clustered histone 13	1.21		LINC00205	long intergenic non-protein coding RNA 205	-1.149		CMTM5	CKLF like MARVEL transmembrane domain containing 5	1.57		CDC42-IT1	CDC42 intronic transcript 1	-1.25
H2BC14	H2B clustered histone 14	1.37		LINC00278	long intergenic non-protein coding RNA 278	-1.37		CNTNAP3	contactin associated protein family member 3	1.27		CDC42P6	cell division cycle 42 pseudogene 6	1.24
H3C8	H3 clustered histone 8	1.48		LINC01136	long intergenic non-protein coding RNA 1136	-1.176		CNTNAP3B	contactin associated protein family member 3B	1.34		CDH2	cadherin 2	-1.351
H3C12	H3 clustered histone 12	1.22		LINC01480	long intergenic non-protein coding RNA 1480	-1.351		CNTNAP3C	contactin associated protein family member 3C	1.92		CDH26	cadherin 26	-1.22
H3P16	H3 histone pseudogene 16	-1.25		LINC02193	--	-1.515		COL5A3	collagen type V alpha 3 chain	1.18		CDIPT	CDP-diacylglycerol--inositol 3-phosphatidyltransferase	1.1
H4C11	H4 clustered histone 11	1.85		LINC02228	long intergenic non-protein coding RNA 2228	2.75		COLGALT2	collagen beta(1-O)galactosyltransferase 2	1.18		CDK14	cyclin dependent kinase 14	-1.136
H4C14	H4 clustered histone 14	-7.143		LOC729732	uncharacterized LOC729732	-1.493		COMMD3	COMM domain containing 3	-1.299		CDK19	cyclin dependent kinase 19	-1.163
HBG1	hemoglobin subunit gamma 1	-2.222		LOC102723373	uncharacterized LOC102723373	-1.176		COMMD8	COMM domain containing 8	-1.389		CDKL5	cyclin dependent kinase like 5	-1.22
HBG2	hemoglobin subunit gamma 2	-2.174		LSM12P1	LSM12 pseudogene 1	1.18		COPS4	COP9 signalosome subunit 4	-1.25		CDKN2AIPNL	CDKN2A interacting protein N-terminal like	1.18
HEATR9	HEAT repeat containing 9	1.42		LUNAR1	--	1.38		COQ5	coenzyme Q5, methyltransferase	-1.235		CDKN2C	cyclin dependent kinase inhibitor 2C	1.25
HEG1	heart development protein with EGF like domains 1	1.16		MANF	mesencephalic astrocyte derived neurotrophic factor	1.14		COX7A2	cytochrome c oxidase subunit 7A2	-1.282		CDPF1	cysteine rich DPF motif domain containing 1	1.2
HELLPAR	HELLP associated long non-coding RNA	-1.429		MARCO	macrophage receptor with collagenous structure	1.21		COX7B	cytochrome c oxidase subunit 7B	-1.389		CENPE	centromere protein E	1.35
HELZ2	helicase with zinc finger 2	1.24		MGAM2	maltase-glucoamylase 2 (putative)	-1.266		CREG1	cellular repressor of E1A stimulated genes 1	1.16		CENPI	centromere protein I	1.26
HES6	hes family bHLH transcription factor 6	1.27		MGST2	microsomal glutathione S-transferase 2	1.15		CRISP3	cysteine rich secretory protein 3	1.34		CENPP	centromere protein P	-1.205
HIPK1-AS1	HIPK1 antisense RNA 1	-1.429		mir-3648	microRNA 3648-1	-14.286		CSKMT	citrate synthase lysine methyltransferase	-1.266		CEP41	centrosomal protein 41	-1.149
HKDC1	hexokinase domain containing 1	-1.266		MIR663AHG	MIR663A host gene	1.28		CTA_345G41	--	1.57		CEP43	centrosomal protein 43	-1.22
HNRNPA1P10	heterogeneous nuclear ribonucleoprotein A1 pseudogene 10	-1.639		MOK	MOK protein kinase	-1.25		CTB_31O202	--	-1.205		CEP76	centrosomal protein 76	1.16
HNRNPH2	heterogeneous nuclear ribonucleoprotein H2	-1.19		MT-ND3	NADH dehydrogenase, subunit 3 (complex I)	-1.19		CTB_63M221	--	-1.471		CEP295NL	CEP295 N-terminal like	-1.316
HS3ST1	heparan sulfate-glucosamine 3-sulfotransferase 1	-1.538		MT-ND6	NADH dehydrogenase, subunit 6 (complex I)	-4.545		CTC_425O235	--	1.48		CFAP70	cilia and flagella associated protein 70	-1.235
HSF5	heat shock transcription factor 5	-1.316		MT-RNR1	s-rRNA	2.86		CTC_459F41	--	-1.266		CH17_258A224	--	-2.857
HSP90B2P	heat shock protein 90 beta family member 2, pseudogene	1.33		MT-RNR2	l-rRNA	3.67		CTD-2245F17.3	--	-1.176		CH507-513H4.3	--	3.59
IGHV1-69D	immunoglobulin heavy variable 1-69D	-1.587		MT1L	metallothionein 1L, pseudogene	1.35		CTD-3088G3.8	--	1.35		CH507-513H4.4	--	24.04
IGKV2-24	immunoglobulin kappa variable 2-24	-2.703		MYBPH	myosin binding protein H	-1.429		CTD_2012K145	--	1.19		CH507-513H4.5	--	4.33
IGKV2-28	immunoglobulin kappa variable 2-28	1.89		MYLK4	myosin light chain kinase family member 4	-1.176		CTD_2270P145	--	-1.19		CH507-513H4.6	--	5.68
IGKV2D-29	immunoglobulin kappa variable 2D-29	-1.587		MYO16	myosin XVI	-1.235		CTD_2542L181	--	1.32		CHCHD1	coiled-coil-helix-coiled-coil-helix domain containing 1	1.21
IGKV3D-15	immunoglobulin kappa variable 3D-15 (gene/pseudogene)	2.61		MYO3B	myosin IIIB	-1.449		CTD_2619J1317	--	-1.25		CHCHD2	coiled-coil-helix-coiled-coil-helix domain containing 2	1.22
IGLL1/IGLL5	immunoglobulin lambda like polypeptide 1	-1.299		NAIP	NLR family apoptosis inhibitory protein	1.17		CTD_3092A112	--	1.32		CHD2	chromodomain helicase DNA binding protein 2	-1.099
IGLV1-44	immunoglobulin lambda variable 1-44	-1.754		NBPF3	NBPF member 3	1.13		CTD_3126B102	--	1.32		CHD7	chromodomain helicase DNA binding protein 7	-1.136
IGLV2-8	immunoglobulin lambda variable 2-8	-1.333		NBPF1 (includes others)	NBPF member 11	-1.299		CTDSPL	CTD small phosphatase like	1.51		CHEK2	checkpoint kinase 2	1.17
IGLV3-19	immunoglobulin lambda variable 3-19	-1.471		NDUFAF2	NADH:ubiquinone oxidoreductase complex assembly factor 2	1.25		CTIF	cap binding complex dependent translation initiation factor	1.19		CHI3L2	chitinase 3 like 2	1.24
IL12RB1	interleukin 12 receptor subunit beta 1	1.14		NEAT1	nuclear paraspeckle assembly transcript 1	-1.449		CTSG	cathepsin G	1.44		CHID1	chitinase domain containing 1	1.13
IL18BP	interleukin 18 binding protein	1.21		NMNAT3	nicotinamide nucleotide adenylyltransferase 3	1.18		CTTN	cortactin	1.59		CHSY1	chondroitin sulfate synthase 1	-1.22
INTS9	integrator complex subunit 9	1.12		NUBPL	nucleotide binding protein like	-1.163		CUL4A	cullin 4A	1.12		CLC	Charcot-Leyden crystal galectin	1.43
IPO13	importin 13	1.13		OLFM2	olfactomedin 2	1.22		CUTALP	cutA divalent cation tolerance like, pseudogene	-1.149		CLCN4	chloride voltage-gated channel 4	-1.235
ITGAD	integrin subunit alpha D	1.41		OR7E38P	olfactory receptor family 7 subfamily E member 38 pseudogene	1.16		CWC15	CWC15 spliceosome associated protein homolog	-1.176		CLEC11A	C-type lectin domain containing 11A	1.33
ITGAL	integrin subunit alpha L	1.2		OSBPL10	oxysterol binding protein like 10	-1.235		CXCL5	C-X-C motif chemokine ligand 5	1.36		CLIC2	chloride intracellular channel 2	1.21
ITPRIPL1	ITPRIP like 1	1.19		OST4	oligosaccharyltransferase complex subunit 4, non-catalytic	1.11		CXCR2P1	C-X-C motif chemokine receptor 2 pseudogene 1	1.38		CLMN	calmin	-1.176
JCHAIN	joining chain of multimeric IgA and IgM	-1.351		PDCD1LG2	programmed cell death 1 ligand 2	1.72		CYP2D8P	ccytochrome P450 family 2 subfamily D member 8, pseudogene	1.41		CNPPD1	cyclin Pas1/PHO80 domain containing 1	1.14
KCNMB1	potassium calcium-activated channel subfamily M regulatory beta subunit 1	1.25		PGAM4	phosphoglycerate mutase family member 4	-1.266		DAAM2	dishevelled associated activator of morphogenesis 2	1.56		CNTNAP3C	contactin associated protein family member 3C	1.58
KIF19	kinesin family member 19	1.46		PHLDA1	pleckstrin homology like domain family A member 1	-1.282		DDX11L10	DEAD/H-box helicase 11 like 10 (pseudogene)	2		COL4A4	collagen type IV alpha 4 chain	-1.19
KIF13B	kinesin family member 13B	1.18		PI3	peptidase inhibitor 3	1.31		DEFA4	defensin alpha 4	1.58		COMMD6	COMM domain containing 6	1.48
KIR3DL1	killer cell immunoglobulin like receptor, three Ig domains and long cytoplasmic tail 1	1.36		PKIG	cAMP-dependent protein kinase inhibitor gamma	-1.136		DEFA1 (includes others)	defensin alpha 1	1.42		COMMD9	COMM domain containing 9	1.13
KIR3DX1	killer cell immunoglobulin like receptor, three Ig domains X1 (pseudogene)	1.46		PLB1	phospholipase B1	-1.25		DGKK	diacylglycerol kinase kappa	1.32		COPS9	COP9 signalosome subunit 9	1.23
KRT17P8	keratin 17 pseudogene 8	1.24		PLIN4	perilipin 4	-1.316		DHFR2	dihydrofolate reductase 2	-1.205		COPZ1	COPI coat complex subunit zeta 1	1.14
LAG3	lymphocyte activating 3	1.4		POLRMTP1	RNA polymerase mitochondrial pseudogene 1	1.17		DIXDC1	DIX domain containing 1	-1.282		COX4I1	cytochrome c oxidase subunit 4I1	1.15
LGR6	leucine rich repeat containing G protein-coupled receptor 6	1.24		POU2AF1	POU class 2 homeobox associating factor 1	-1.176		DMAC1	distal membrane arm assembly complex 1	-1.25		COX5A	cytochrome c oxidase subunit 5A	1.2
LIMK1	LIM domain kinase 1	1.17		PPP1R14BP3	protein phosphatase 1 regulatory inhibitor subunit 14B pseudogene 3	-1.282		DNAAF2	dynein axonemal assembly factor 2	-1.282		COX5B	cytochrome c oxidase subunit 5B	1.18
LIMS2	LIM zinc finger domain containing 2	-1.37		PPP1R9A	protein phosphatase 1 regulatory subunit 9A	-1.205		DNM3	dynamin 3	1.34		COX6A1	cytochrome c oxidase subunit 6A1	1.19
LINC00299	long intergenic non-protein coding RNA 299	1.23		PRDX1	peroxiredoxin 1	1.14		DNTTIP2	deoxynucleotidyltransferase terminal interacting protein 2	-1.205		COX6A1P2	cytochrome c oxidase subunit 6A1 pseudogene 2	1.3
LINC00653	long intergenic non-protein coding RNA 653	-1.25		PTGES	prostaglandin E synthase	-1.389		DPYD-IT1	DPYD intronic transcript 1	1.2		COX6B1	cytochrome c oxidase subunit 6B1	1.19
LINC00958	long intergenic non-protein coding RNA 958	-1.351		RAD9A	RAD9 checkpoint clamp component A	-1.19		DUT	deoxyuridine triphosphatase	-1.176		COX7A2	cytochrome c oxidase subunit 7A2	1.29
LINC00987	long intergenic non-protein coding RNA 987	1.19		RCN3	reticulocalbin 3	-1.351		DYRK4	dual specificity tyrosine phosphorylation regulated kinase 4	-1.205		COX7C	cytochrome c oxidase subunit 7C	1.39
LINC01176	long intergenic non-protein coding RNA 1176	1.26		RGS5	regulator of G protein signaling 5	-1.19		DYRK1B	dual specificity tyrosine phosphorylation regulated kinase 1B	1.16		COX8A	cytochrome c oxidase subunit 8A	1.13
LINC01422	long intergenic non-protein coding RNA 1422	1.2		RHCE/RHD	Rh blood group D antigen	1.3		EBNA1BP2	EBNA1 binding protein 2	-1.149		CPEB2	cytoplasmic polyadenylation element binding protein 2	-1.176
LINC01881	long intergenic non-protein coding RNA 1881	-1.266		RHPN1	rhophilin Rho GTPase binding protein 1	-1.25		EEF1A1	eukaryotic translation elongation factor 1 alpha 1	-1.316		CPEB2-DT	CPEB2 divergent transcript	-1.316
LIPT2	lipoyl(octanoyl) transferase 2	-1.299		RILP	Rab interacting lysosomal protein	1.19		EEF1A1P9	eukaryotic translation elongation factor 1 alpha 1 pseudogene 9	-1.351		CPSF3	cleavage and polyadenylation specific factor 3	1.13
LMLN	leishmanolysin like peptidase	1.22		RN7SL4P	RNA, 7SL, cytoplasmic 4, pseudogene	-1.408		EEF1A1P11	eukaryotic translation elongation factor 1 alpha 1 pseudogene 11	-1.515		CR1	complement C3b/C4b receptor 1 (Knops blood group)	-1.205
LOC389641	uncharacterized LOC389641	-1.205		RNF207	ring finger protein 207	-1.282		EEF1A1P13	eukaryotic translation elongation factor 1 alpha 1 pseudogene 13	-1.408		CR2	complement C3d receptor 2	-1.25
LOC441666	zinc finger protein 91 pseudogene	-1.515		RP11-734K23.9	--	-3.846		EEF1A1P19	eukaryotic translation elongation factor 1 alpha 1 pseudogene 19	-1.25		CREB5	cAMP responsive element binding protein 5	-1.19
LOC100128398	uncharacterized LOC100128398	-1.136		RP11_1415C144	--	-1.25		EEF1B2	eukaryotic translation elongation factor 1 beta 2	-1.515		CREG1	cellular repressor of E1A stimulated genes 1	1.16
LOC100996442	uncharacterized LOC100996442	1.88		RP11_141B142	--	-1.235		EEF1B2P3	eukaryotic translation elongation factor 1 beta 2 pseudogene 3	-1.449		CRYBB2P1	crystallin beta B2 pseudogene 1	-1.149
LOC101928343	uncharacterized LOC101928343	1.22		RP11_154J221	--	-1.266		EEF1DP3	eukaryotic translation elongation factor 1 delta pseudogene 3	1.23		CRYL1	crystallin lambda 1	1.13
LOC105372321	--	-1.37		RP11_174O33	--	-1.471		EGF	epidermal growth factor	1.49		CSTA	cystatin A	1.44
LOC105378085	uncharacterized LOC105378085	-1.37		RP11_318K152	--	-1.299		EGFL7	EGF like domain multiple 7	1.52		CTA_363E66	--	1.2
LOC107987373	39S ribosomal protein L23, mitochondrial	-1.818		RP11_348N57	--	-1.22		EHD3	EH domain containing 3	1.26		CTB_131B52	--	-1.408
LY6E	lymphocyte antigen 6 family member E	1.22		RP11_34P1316	--	-1.587		EHMT1	euchromatic histone lysine methyltransferase 1	1.12		CTB_139P112	--	-1.37
LYRM7	LYR motif containing 7	-1.22		RP11_519C121	--	-1.282		EIF3C	eukaryotic translation initiation factor 3 subunit C	-1.852		CTB_31N193	--	-1.149
MATK	megakaryocyte-associated tyrosine kinase	1.18		RP11_554J41	--	1.21		EIF4BP3	eukaryotic translation initiation factor 4B pseudogene 3	-1.282		CTB_63M221	--	1.23
MC1R	melanocortin 1 receptor	1.29		RP11_563N66	--	-1.19		EIF4BP6	eukaryotic translation initiation factor 4B pseudogene 6	-1.19		CTB_79E83	--	1.62
mir-3648	microRNA 3648-1	130.05		RP11_587D211	--	1.41		EIF4BP7	eukaryotic translation initiation factor 4B pseudogene 7	-1.205		CTBP2P8	CTBP2 pseudogene 8	-1.299
MIR646HG	MIR646 host gene	1.21		RP11_589F54	--	2.22		ELAPOR1	endosome-lysosome associated apoptosis and autophagy regulator 1	1.25		CTC_137K31	--	-1.351
MLC1	modulator of VRAC current 1	1.29		RP11_678G144	--	-1.235		ELOVL7	ELOVL fatty acid elongase 7	1.46		CTD_2031P194	--	1.41
MON1A	MON1 homolog A, secretory trafficking associated	1.2		RP11_803D51	--	-1.333		EP400	E1A binding protein p400	1.22		CTD_2287O161	--	1.47
MRAS	muscle RAS oncogene homolog	1.21		RP11_81A14	--	-1.266		EPB41L4A-AS1	EPB41L4A antisense RNA 1	-1.163		CTNNAL1	catenin alpha like 1	1.29
MSS51	MSS51 mitochondrial translational activator	1.2		RP11_98J232	--	-1.818		EPS15L1	epidermal growth factor receptor pathway substrate 15 like 1	1.19		CTSH	cathepsin H	1.16
MVB12B	multivesicular body subunit 12B	1.21		RP1_80N23	--	-1.25		ERH	ERH mRNA splicing and mitosis factor	-1.37		CTTNBP2NL	CTTNBP2 N-terminal like	-1.22
MYO16	myosin XVI	1.33		RP3_508I1514	--	-1.316		ERN1	endoplasmic reticulum to nucleus signaling 1	1.16		CTU2	cytosolic thiouridylase subunit 2	1.17
MYO1G	myosin IG	1.14		RP3_508I1519	--	-1.282		ESAM	endothelial cell adhesion molecule	1.37		CUTA	cutA divalent cation tolerance homolog	1.14
MYO7A	myosin VIIA	1.28		RP4_765C72	--	1.69		ESF1	ESF1 nucleolar pre-rRNA processing protein homolog	-1.235		CXCL10	C-X-C motif chemokine ligand 10	1.66
NBPF1 (includes others)	NBPF member 11	1.14		RPL21P134	ribosomal protein L21 pseudogene 134	-6.667		EVC	EvC ciliary complex subunit 1	-1.471		CXCR3	C-X-C motif chemokine receptor 3	1.15
NBPF25P	NBPF member 25, pseudogene	-2.128		RPL23AP65	ribosomal protein L23a pseudogene 65	1.35		EVI2A	ecotropic viral integration site 2A	-1.587		CYB5R1	cytochrome b5 reductase 1	1.11
NCAM1	neural cell adhesion molecule 1	1.18		RPL41P1	ribosomal protein L41 pseudogene 1	-2.632		F13A1	coagulation factor XIII A chain	1.39		CYC1	cytochrome c1	1.13
NDUFB6	NADH:ubiquinone oxidoreductase subunit B6	-1.176		RPL7AP31	ribosomal protein L7a pseudogene 31	1.31		FAM111B	family with sequence similarity 111 member B	-1.333		CYP1B1-AS1	CYP1B1 antisense RNA 1	-1.205
NKG7	natural killer cell granule protein 7	1.17		RPL7P1	ribosomal protein L7 pseudogene 1	1.46		FAM114A1	family with sequence similarity 114 member A1	1.19		CYP4F3	cytochrome P450 family 4 subfamily F member 3	-1.282
NKIRAS1	NFKB inhibitor interacting Ras like 1	-1.25		RUBCNL	rubicon like autophagy enhancer	-1.19		FAM157A/FAM157B	family with sequence similarity 157 member A	1.4		DAAM2	dishevelled associated activator of morphogenesis 2	-1.389
NMUR1	neuromedin U receptor 1	1.29		SDC2	syndecan 2	-1.282		FAM189B	family with sequence similarity 189 member B	1.33		DACH1	dachshund family transcription factor 1	-1.25
NPC1	NPC intracellular cholesterol transporter 1	1.13		SERPINE2	serpin family E member 2	1.26		FAM222B	family with sequence similarity 222 member B	1.28		DAD1	defender against cell death 1	1.15
NSMCE2	NSE2 (MMS21) homolog, SMC5-SMC6 complex SUMO ligase	-1.205		SLC22A1	solute carrier family 22 member 1	-1.266		FAR2	fatty acyl-CoA reductase 2	1.18		DAP3	death associated protein 3	1.1
NTSR1	neurotensin receptor 1	2.06		SLC26A8	solute carrier family 26 member 8	-1.282		FBXO4	F-box protein 4	-1.25		DBNDD1	dysbindin domain containing 1	1.25
NUDT4B	nudix hydrolase 4B	-6.667		SLC45A4	solute carrier family 45 member 4	-1.149		FCER1A	Fc fragment of IgE receptor Ia	-1.351		DCTPP1	dCTP pyrophosphatase 1	1.28
NUP93	nucleoporin 93	1.14		SLED1	proteoglycan 3, pro eosinophil major basic protein 2 pseudogene	-1.299		FCGR1A	Fc fragment of IgG receptor Ia	1.33		DDRGK1	DDRGK domain containing 1	1.12
NUTM2A-AS1	NUTM2A antisense RNA 1	-1.136		SMIM1	small integral membrane protein 1 (Vel blood group)	1.35		FHL1	four and a half LIM domains 1	1.22		DDT	D-dopachrome tautomerase	1.18
OAS3	2'-5'-oligoadenylate synthetase 3	1.3		SMIM35	small integral membrane protein 35	-1.19		FLJ38576	--	-1.389		DDX3Y	DEAD-box helicase 3 Y-linked	1.21
OR51R1P	olfactory receptor family 51 subfamily R member 1 pseudogene	1.29		SMN1/SMN2	survival of motor neuron 1, telomeric	1.58		FLT1	fms related receptor tyrosine kinase 1	1.47		DDX50P1	DEAD-box helicase 50 pseudogene 1	-1.22
OR52K2	olfactory receptor family 52 subfamily K member 2	1.38		SNORA74B	small nucleolar RNA, H/ACA box 74B	-1.389		FRMD3	FERM domain containing 3	1.28		DGKG	diacylglycerol kinase gamma	-1.149
OSBPL5	oxysterol binding protein like 5	1.23		SNX22	sorting nexin 22	-1.124		FSTL1	follistatin like 1	1.56		DLG3	discs large MAGUK scaffold protein 3	1.13
OTUD1	OTU deubiquitinase 1	-1.149		SOX4	SRY-box transcription factor 4	-1.19		FUS	FUS RNA binding protein	1.18		DLGAP2	DLG associated protein 2	-2
PACSIN1	protein kinase C and casein kinase substrate in neurons 1	1.33		SRGAP2B	SLIT-ROBO Rho GTPase activating protein 2B	1.32		FZD5	frizzled class receptor 5	1.18		DNAJA1	DnaJ heat shock protein family (Hsp40) member A1	1.23
PAFAH2	platelet activating factor acetylhydrolase 2	1.12		SSR4P1	signal sequence receptor subunit 4 pseudogene 1	1.31		GABARAPL2	GABA type A receptor associated protein like 2	1.2		DNAJB1	DnaJ heat shock protein family (Hsp40) member B1	1.11
PAN3-AS1	PAN3 antisense RNA 1	-1.25		ST6GALNAC3	ST6 N-acetylgalactosaminide alpha-2,6-sialyltransferase 3	-1.19		GABRR2	gamma-aminobutyric acid type A receptor subunit rho2	1.39		DNAJB5	DnaJ heat shock protein family (Hsp40) member B5	-1.351
PANX1	pannexin 1	1.14		TCAF1	TRPM8 channel associated factor 1	-1.333		GALNS	galactosamine (N-acetyl)-6-sulfatase	1.25		DNAJC8	DnaJ heat shock protein family (Hsp40) member C8	1.18
PARPBP	PARP1 binding protein	-1.299		TEK	TEK receptor tyrosine kinase	-1.515		GAS7	growth arrest specific 7	1.18		DNASE2	deoxyribonuclease 2, lysosomal	1.12
PATL2	PAT1 homolog 2	1.17		TGFB3	transforming growth factor beta 3	-1.205		GATAD2A	GATA zinc finger domain containing 2A	1.16		DNMBP	dynamin binding protein	-1.163
PCBP3-OT1	--	1.43		TKTL1	transketolase like 1	1.22		GATD3A/GATD3B	glutamine amidotransferase like class 1 domain containing 3A	-2.703		DOCK5	dedicator of cytokinesis 5	-1.19
PCDH9	protocadherin 9	-1.316		TMEM176B	transmembrane protein 176B	1.13		GFI1B	growth factor independent 1B transcriptional repressor	1.35		DOCK8	dedicator of cytokinesis 8	-1.136
PCNP	PEST proteolytic signal containing nuclear protein	-1.205		TMPRSS9	transmembrane serine protease 9	1.25		GGCT	gamma-glutamylcyclotransferase	-1.205		DOHH	deoxyhypusine hydroxylase	1.19
PCSK1N	proprotein convertase subtilisin/kexin type 1 inhibitor	-1.587		TMSB4XP6	TMSB4X pseudogene 6	1.25		GIMAP2	GTPase, IMAP family member 2	-1.25		DOK2	docking protein 2	1.13
PDCL3	phosducin like 3	-1.19		TNFRSF9	TNF receptor superfamily member 9	-1.25		GIMAP7	GTPase, IMAP family member 7	-1.19		DOLK	dolichol kinase	1.16
PDCL3P2	PDCL3 pseudogene 2	1.34		TRAJ33	T cell receptor alpha joining 33	1.24		GIN1	gypsy retrotransposon integrase 1	-1.22		DPCD	deleted in primary ciliary dyskinesia homolog (mouse)	1.25
PDGFRB	platelet derived growth factor receptor beta	1.29		TRAJ37	T cell receptor alpha joining 37	1.31		GIPR	gastric inhibitory polypeptide receptor	1.31		DPM3	dolichyl-phosphate mannosyltransferase subunit 3, regulatory	1.23
PDPK2P	3-phosphoinositide dependent protein kinase 2, pseudogene	1.64		TRAV16	T cell receptor alpha variable 16	1.31		GNAO1	G protein subunit alpha o1	1.24		DPY19L2	dpy-19 like 2	1.36
PDZD4	PDZ domain containing 4	1.18		TSC22D1-AS1	TSC22D1 antisense RNA 1	-1.205		GNAZ	G protein subunit alpha z	1.52		DRAP1	DR1 associated protein 1	1.17
PGAM4	phosphoglycerate mutase family member 4	1.28		TXLNGY	taxilin gamma pseudogene, Y-linked	1.36		GNG11	G protein subunit gamma 11	1.48		DTL	denticleless E3 ubiquitin protein ligase homolog	1.31
PGAM5	PGAM family member 5, mitochondrial serine/threonine protein phosphatase	1.14		U1	--	-2.632		GNGT2	G protein subunit gamma transducin 2	-1.205		DUSP2	dual specificity phosphatase 2	1.2
PLAAT3	phospholipase A and acyltransferase 3	1.22		U1	--	-1.613		GOLGA8Q	golgin A8 family member Q	1.39		DUSP19	dual specificity phosphatase 19	-1.205
PLEKHF1	pleckstrin homology and FYVE domain containing 1	1.2		U2AF1/U2AF1L5	U2 small nuclear RNA auxiliary factor 1	-1.282		GP5	glycoprotein V platelet	1.24		DUSP23	dual specificity phosphatase 23	1.2
POLR2M	RNA polymerase II subunit M	-1.25		UBE2S	ubiquitin conjugating enzyme E2 S	1.17		GP6	glycoprotein VI platelet	1.58		DYNLL1	dynein light chain LC8-type 1	1.16
PPARGC1B	PPARG coactivator 1 beta	1.21		USP9Y	ubiquitin specific peptidase 9 Y-linked	1.26		GP9	glycoprotein IX platelet	1.49		DYSF	dysferlin	-1.266
PRF1	perforin 1	1.25		UTP14A	UTP14A small subunit processome component	1.13		GP1BA	glycoprotein Ib platelet subunit alpha	1.74		E2F3-IT1	E2F3 intronic transcript 1	-1.266
PRKXP1	PRKX pseudogene 1	1.32		WASHC5	WASH complex subunit 5	1.1		GPR15	G protein-coupled receptor 15	-1.22		EBF1	EBF transcription factor 1	-1.205
PRR5L	proline rich 5 like	1.15		WDR49	WD repeat domain 49	-1.266		GPR75	G protein-coupled receptor 75	1.29		EBNA1BP2	EBNA1 binding protein 2	1.17
PRSS57	serine protease 57	1.47		WHRN	whirlin	-1.37		GRAPL	GRB2 related adaptor protein like	2.52		EBP	EBP cholestenol delta-isomerase	1.16
PTGDS	prostaglandin D2 synthase	1.31		ZNF57	zinc finger protein 57	1.24		GS1_184P142	--	-14.286		ECHDC3	enoyl-CoA hydratase domain containing 3	1.29
PTGIR	prostaglandin I2 receptor	1.2		ZNF483	zinc finger protein 483	1.17		GSE1	Gse1 coiled-coil protein	1.28		ECHS1	enoyl-CoA hydratase, short chain 1	1.16
PTOV1-AS1	PTOV1 antisense RNA 1	-1.22		ZNF662	zinc finger protein 662	1.32		GSTM2	glutathione S-transferase mu 2	1.22		ECSIT	ECSIT signaling integrator	1.21
PTPRM	protein tyrosine phosphatase receptor type M	1.14		ZNF667	zinc finger protein 667	-1.205		GTF2H3	general transcription factor IIH subunit 3	-1.205		EDF1	endothelial differentiation related factor 1	1.11
PTTG1	PTTG1 regulator of sister chromatid separation, securin	1.23		ZNF669	zinc finger protein 669	1.19		GTF2IP1	general transcription factor IIi pseudogene 1	1.47		EEF1A1	eukaryotic translation elongation factor 1 alpha 1	1.22
PUS7	pseudouridine synthase 7	-1.176		ZNF860	zinc finger protein 860	-1.22		GUCY1B1	guanylate cyclase 1 soluble subunit beta 1	1.4		EEF1A1P6	eukaryotic translation elongation factor 1 alpha 1 pseudogene 6	1.65
PWWP2B	PWWP domain containing 2B	1.24		ZNF322P1	zinc finger protein 322 pseudogene 1	2.69		GZMK	granzyme K	-1.235		EEF1A1P30	eukaryotic translation elongation factor 1 alpha 1 pseudogene 30	-1.19
RAB43	RAB43, member RAS oncogene family	1.2						H1-0	H1.0 linker histone	1.29		EEF1B2P3	eukaryotic translation elongation factor 1 beta 2 pseudogene 3	1.52
RBM7	RNA binding motif protein 7	-1.266						H1-3	H1.3 linker histone, cluster member	-1.19		EEF1DP3	eukaryotic translation elongation factor 1 delta pseudogene 3	-1.205
RERE-AS1	RERE antisense RNA 1	1.25						H1-10	H1.10 linker histone	-1.19		EFCAB12	EF-hand calcium binding domain 12	-1.37
RETREG1	reticulophagy regulator 1	-1.282						H2AC14	H2A clustered histone 14	1.43		EFHC1	EF-hand domain containing 1	-1.136
RGPD4 (includes others)	RANBP2 like and GRIP domain containing 5	-2.273						H2AC18/H2AC19	H2A clustered histone 18	2.96		EIF6	eukaryotic translation initiation factor 6	1.13
RHOC	ras homolog family member C	1.15						H2BC14	H2B clustered histone 14	1.25		EIF1AXP1	EIF1AX pseudogene 1	1.19
RNF165	ring finger protein 165	1.24						H3C15	H3 clustered histone 15	4.76		EIF1AY	eukaryotic translation initiation factor 1A Y-linked	1.47
RNU1-27P	RNA, U1 small nuclear 27, pseudogene	-2.439						H4C2	H4 clustered histone 2	-1.176		EIF2S2	eukaryotic translation initiation factor 2 subunit beta	1.16
RP11-734K23.9	--	2.76						H4C14	H4 clustered histone 14	-20		EIF3CL	eukaryotic translation initiation factor 3 subunit C like	3.25
RP11_1102P222	--	1.19						H4C15	H4 clustered histone 15	9.43		EIF3D	eukaryotic translation initiation factor 3 subunit D	1.11
RP11_121A81	--	1.19						HAPLN3	hyaluronan and proteoglycan link protein 3	-1.205		EIF3E	eukaryotic translation initiation factor 3 subunit E	1.21
RP11_158K13	--	-1.176						HBD	hemoglobin subunit delta	1.34		EIF3I	eukaryotic translation initiation factor 3 subunit I	1.17
RP11_345J182	--	1.22						HBG1	hemoglobin subunit gamma 1	-1.587		EIF3K	eukaryotic translation initiation factor 3 subunit K	1.12
RP11_355B112	--	-1.22						HBG2	hemoglobin subunit gamma 2	-1.538		EIF3L	eukaryotic translation initiation factor 3 subunit L	1.12
RP11_364L41	--	-1.818						HBM	hemoglobin subunit mu	1.4		EIF4A3	eukaryotic translation initiation factor 4A3	1.12
RP11_395L1418	--	-1.333						HDAC4	histone deacetylase 4	1.15		EIF4E3	eukaryotic translation initiation factor 4E family member 3	-1.149
RP11_44F1410	--	-1.471						HEMGN	hemogen	1.38		EIF4EP2	eukaryotic translation initiation factor 4E pseudogene 2	1.27
RP11_46D61	--	-2.174						HEPACAM2	HEPACAM family member 2	1.35		EIF5A	eukaryotic translation initiation factor 5A	1.14
RP11_475C161	--	-1.587						HEXIM2	HEXIM P-TEFb complex subunit 2	1.35		ELAPOR1	endosome-lysosome associated apoptosis and autophagy regulator 1	-1.205
RP11_488L1810	--	-1.408						HGD	homogentisate 1,2-dioxygenase	1.27		ELMO1	engulfment and cell motility 1	-1.136
RP11_497H171	--	1.33						HINT1	histidine triad nucleotide binding protein 1	-1.333		ELMO3	engulfment and cell motility 3	-1.22
RP11_589F54	--	-1.852						HINT2	histidine triad nucleotide binding protein 2	-1.22		ELOB	elongin B	1.26
RP11_605F221	--	2.33						HIPK2	homeodomain interacting protein kinase 2	1.23		ELOF1	elongation factor 1 homolog	1.18
RP11_761N212	--	1.79						HIPK1-AS1	HIPK1 antisense RNA 1	-1.471		EMC3	ER membrane protein complex subunit 3	1.14
RP11_802E163	--	1.17						HKDC1	hexokinase domain containing 1	-1.235		EMC8	ER membrane protein complex subunit 8	1.12
RP11_862L92	--	1.17						HLA-DRA	major histocompatibility complex, class II, DR alpha	-1.176		ENSAP2	endosulfine alpha pseudogene 2	1.23
RP3_508I1514	--	1.3						HLA-G	major histocompatibility complex, class I, G	-1.389		EP400P1	EP400 pseudogene 1	-1.205
RP3_508I1521	--	1.38						HLA-J	major histocompatibility complex, class I, J (pseudogene)	-1.299		EPB42	erythrocyte membrane protein band 4.2	1.23
RP4_568C114	--	-1.515						HMGB1	high mobility group box 1	-1.22		EPHA1-AS1	EPHA1 antisense RNA 1	-1.149
RP4_765C72	--	-1.351						HMGB2	high mobility group box 2	-1.266		ERICH1	glutamate rich 1	-1.136
RP5_1126H102	--	1.25						HMGN4	high mobility group nucleosomal binding domain 4	-1.124		ERV3-1	endogenous retrovirus group 3 member 1, envelope	-1.149
RP5_867C241	--	1.32						HP	haptoglobin	1.3		ETHE1	ETHE1 persulfide dioxygenase	1.14
RPH3AL	rabphilin 3A like (without C2 domains)	1.22						HPCAL4	hippocalcin like 4	-1.25		F5	coagulation factor V	-1.282
RPL10P19	ribosomal protein L10 pseudogene 19	1.37						HSF5	heat shock transcription factor 5	-1.282		FAM104B	family with sequence similarity 104 member B	1.25
RPL15P18	ribosomal protein L15 pseudogene 18	-1.724						HTR7P1	5-hydroxytryptamine receptor 7 pseudogene 1	-1.22		FAM106C	family with sequence similarity 106 member C	-1.266
RPL21P119	ribosomal protein L21 pseudogene 119	4.7						ID3	inhibitor of DNA binding 3, HLH protein	-1.22		FAM126B	family with sequence similarity 126 member B	-1.282
RPL21P134	ribosomal protein L21 pseudogene 134	-2.778						IFI6	interferon alpha inducible protein 6	-1.205		FAM13A-AS1	FAM13A antisense RNA 1	-1.124
RPL3L	ribosomal protein L3 like	-1.667						IFI44	interferon induced protein 44	-1.282		FAM153A/FAM153B	family with sequence similarity 153 member B	-1.299
RPL41P1	ribosomal protein L41 pseudogene 1	-3.846						IFI44L	interferon induced protein 44 like	-1.333		FAM157C	family with sequence similarity 157 member C	-1.389
RPS11P5	ribosomal protein S11 pseudogene 5	-1.235						IFIT1	interferon induced protein with tetratricopeptide repeats 1	-1.282		FAM216A	family with sequence similarity 216 member A	1.17
RPS26P6	ribosomal protein S26 pseudogene 6	2.99						IFIT5	interferon induced protein with tetratricopeptide repeats 5	-1.22		FAM71F2	family with sequence similarity 71 member F2	-1.389
RPS4Y1	ribosomal protein S4 Y-linked 1	-1.37						IGF1R	insulin like growth factor 1 receptor	1.21		FAM89B	family with sequence similarity 89 member B	1.15
RPSAP9	ribosomal protein SA pseudogene 9	1.57						IGF2R	insulin like growth factor 2 receptor	1.25		FANCL	FA complementation group L	1.32
RPSAP19	ribosomal protein SA pseudogene 19	-1.389						IGHV1-69D	immunoglobulin heavy variable 1-69D	-1.493		FARSB	phenylalanyl-tRNA synthetase subunit beta	1.18
S1PR5	sphingosine-1-phosphate receptor 5	1.19						IGKV2-24	immunoglobulin kappa variable 2-24	-3.226		FBN1	fibrillin 1	-1.389
SASH3	SAM and SH3 domain containing 3	1.13						IGKV2D-29	immunoglobulin kappa variable 2D-29	-1.754		FBXL20	F-box and leucine rich repeat protein 20	-1.176
SASS6	SAS-6 centriolar assembly protein	-1.235						IGKV3-15	immunoglobulin kappa variable 3-15	-1.389		FCER1A	Fc fragment of IgE receptor Ia	1.26
SCARNA6	small Cajal body-specific RNA 6	-1.333						IGLL1/IGLL5	immunoglobulin lambda like polypeptide 1	-1.333		FCGR1A	Fc fragment of IgG receptor Ia	1.3
SCCPDH	saccharopine dehydrogenase (putative)	-1.163						IGLV3-19	immunoglobulin lambda variable 3-19	-1.538		FCRL1	Fc receptor like 1	-1.149
SEC14L2	SEC14 like lipid binding 2	-1.282						IL13RA1	interleukin 13 receptor subunit alpha 1	1.19		FCRL5	Fc receptor like 5	-1.149
SKA3	spindle and kinetochore associated complex subunit 3	-1.408						IL23A	interleukin 23 subunit alpha	-1.299		FEN1	flap structure-specific endonuclease 1	1.14
SLC35F2	solute carrier family 35 member F2	-1.205						ISCA1	iron-sulfur cluster assembly 1	1.27		FIS1	fission, mitochondrial 1	1.18
SLC9A3R1	SLC9A3 regulator 1	1.17						ISOC1	isochorismatase domain containing 1	1.17		FKBP8	FKBP prolyl isomerase 8	1.2
SLPI	secretory leukocyte peptidase inhibitor	-1.266						ITGA2B	integrin subunit alpha 2b	1.57		FKBP9	FKBP prolyl isomerase 9	-1.19
SMAD7	SMAD family member 7	1.15						ITGAD	integrin subunit alpha D	1.31		FKBP1B	FKBP prolyl isomerase 1B	1.27
SMG1P4	SMG1 pseudogene 4	1.5						ITGB3	integrin subunit beta 3	1.58		FLJ42393	--	-1.316
SMTN	smoothelin	1.32						ITGB5	integrin subunit beta 5	1.48		FNDC3B	fibronectin type III domain containing 3B	-1.149
SNORA71A	small nucleolar RNA, H/ACA box 71A	-1.316						ITGB8	integrin subunit beta 8	-1.639		FOLR3	folate receptor gamma	-1.19
SNX21	sorting nexin family member 21	1.18						ITGB1P1	integrin subunit beta 1 pseudogene 1	-1.176		FOXO1	forkhead box O1	-1.136
SNX33	sorting nexin 33	1.17						ITM2A	integral membrane protein 2A	-1.22		FOXP1-IT1	FOXP1 intronic transcript 1	-1.235
SPAG16	sperm associated antigen 16	-1.515						JAM3	junctional adhesion molecule 3	1.44		FRY	FRY microtubule binding protein	-1.149
SPATA20	spermatogenesis associated 20	1.25						JRKL	JRK like	-1.235		FTL	ferritin light chain	1.11
SPON2	spondin 2	1.32						KANSL1	KAT8 regulatory NSL complex subunit 1	1.12		FUCA1	alpha-L-fucosidase 1	1.11
SPP1	secreted phosphoprotein 1	-1.515						KDM7A-DT	KDM7A divergent transcript	1.31		FUCA2	alpha-L-fucosidase 2	1.15
SPTSSA	serine palmitoyltransferase small subunit A	-1.235						KIF13B	kinesin family member 13B	1.15		FUNDC1	FUN14 domain containing 1	1.35
STAG3L1	stromal antigen 3-like 1 (pseudogene)	1.59						KIF28P	kinesin family member 28, pseudogene	1.58		FUNDC2	FUN14 domain containing 2	1.16
STARD9	StAR related lipid transfer domain containing 9	1.16						KIFBP	kinesin family binding protein	-1.136		GAB1	GRB2 associated binding protein 1	-1.149
STPG1	sperm tail PG-rich repeat containing 1	-1.235						KIFC3	kinesin family member C3	1.31		GADD45GIP1	GADD45G interacting protein 1	1.19
STX1A	syntaxin 1A	1.3						KIR3DL1	killer cell immunoglobulin like receptor, three Ig domains and long cytoplasmic tail 1	1.41		GALNT6	polypeptide N-acetylgalactosaminyltransferase 6	1.11
SYNGR1	synaptogyrin 1	1.22						KIR3DL2	killer cell immunoglobulin like receptor, three Ig domains and long cytoplasmic tail 2	1.35		GAPDHP14	glyceraldehyde-3-phosphate dehydrogenase pseudogene 14	-1.613
SYNM	synemin	-1.19						KIR3DX1	killer cell immunoglobulin like receptor, three Ig domains X1 (pseudogene)	1.37		GARS1	glycyl-tRNA synthetase 1	1.1
TBC1D8B	TBC1 domain family member 8B	-1.695						KLC1	kinesin light chain 1	1.13		GAS6	growth arrest specific 6	1.23
TBX21	T-box transcription factor 21	1.21						KMT2D	lysine methyltransferase 2D	1.31		GAS6-AS1	GAS6 antisense RNA 1	-1.429
TCAF1	TRPM8 channel associated factor 1	1.4						KRT73	keratin 73	1.28		GBP1	guanylate binding protein 1	1.23
TEK	TEK receptor tyrosine kinase	1.4						KRT8P12	keratin 8 pseudogene 12	-1.22		GET3	guided entry of tail-anchored proteins factor 3, ATPase	1.12
TJP2	tight junction protein 2	1.17						LAT	linker for activation of T cells	1.43		GHITM	growth hormone inducible transmembrane protein	1.12
TMPRSS13	transmembrane serine protease 13	1.28						LCN2	lipocalin 2	1.48		GLRX5	glutaredoxin 5	1.2
TNFRSF13B	TNF receptor superfamily member 13B	-1.389						LDHB	lactate dehydrogenase B	-1.176		GLT8D1	glycosyltransferase 8 domain containing 1	1.14
TNFRSF13C	TNF receptor superfamily member 13C	-1.299						LGALS2	galectin 2	-1.235		GNL2	G protein nucleolar 2	1.11
TNK2-AS1	TNK2 antisense RNA 1	-1.389						LHFPL2	LHFPL tetraspan subfamily member 2	1.16		GOLGA8K (includes others)	golgin A8 family member K	1.34
TPD52	tumor protein D52	-1.299						LIG4	DNA ligase 4	-1.19		GPR135	G protein-coupled receptor 135	-1.316
TPST2	tyrosylprotein sulfotransferase 2	1.13						LIMS2	LIM zinc finger domain containing 2	-1.515		GPR141	G protein-coupled receptor 141	-1.19
TRAJ44	T cell receptor alpha joining 44	-1.316						LINC00299	long intergenic non-protein coding RNA 299	1.22		GPR141BP	G protein-coupled receptor 141B, pseudogene	-1.515
TRAV24	T cell receptor alpha variable 24	1.7						LINC00467	long intergenic non-protein coding RNA 467	-1.282		GPX1	glutathione peroxidase 1	1.21
TRBJ1-3	T cell receptor beta joining 1-3	-1.205						LINC00598	long intergenic non-protein coding RNA 598	1.24		GPX4	glutathione peroxidase 4	1.18
TRBV19	T cell receptor beta variable 19	1.23						LINC00653	long intergenic non-protein coding RNA 653	-1.515		GPX1P1	glutathione peroxidase pseudogene 1	1.32
TRBV3-1	T cell receptor beta variable 3-1	-1.37						LINC00862	long intergenic non-protein coding RNA 862	1.25		GS1_115G202	--	-1.515
TRBV4-1	T cell receptor beta variable 4-1	-1.22						LINC00909	long intergenic non-protein coding RNA 909	-1.22		GS1_184P142	--	2.95
TRDV2	T cell receptor delta variable 2	-1.389						LINC00989	long intergenic non-protein coding RNA 989	1.47		GSK3B	glycogen synthase kinase 3 beta	-1.111
TREML4	triggering receptor expressed on myeloid cells like 4	1.29						LINC01176	long intergenic non-protein coding RNA 1176	1.27		GSTO1	glutathione S-transferase omega 1	1.19
TRGV4	T cell receptor gamma variable 4	1.28						LINC01259	long intergenic non-protein coding RNA 1259	-1.282		GTF2B	general transcription factor IIB	1.21
TRGV8	T cell receptor gamma variable 8	1.21						LINC01422	long intergenic non-protein coding RNA 1422	1.28		GTF3A	general transcription factor IIIA	1.16
TRPC6	transient receptor potential cation channel subfamily C member 6	-1.429						LINC01521	long intergenic non-protein coding RNA 1521	-1.282		GUK1	guanylate kinase 1	1.18
TRPM6	transient receptor potential cation channel subfamily M member 6	1.27						LINC02009	long intergenic non-protein coding RNA 2009	1.49		GZMA	granzyme A	1.39
TSPAN4	tetraspanin 4	1.23						LINC02284	long intergenic non-protein coding RNA 2284	1.37		H1-3	H1.3 linker histone, cluster member	1.18
TSPEAR	thrombospondin type laminin G domain and EAR repeats	1.4						LINC02352	long intergenic non-protein coding RNA 2352	1.2		H1-5	H1.5 linker histone, cluster member	1.22
TSPOAP1	TSPO associated protein 1	1.22						LINC02361	long intergenic non-protein coding RNA 2361	-1.235		H2AC4	H2A clustered histone 4	1.33
TSPYL5	TSPY like 5	-1.316						LINC02363	long intergenic non-protein coding RNA 2363	1.39		H2AC8	H2A clustered histone 8	1.17
TTC16	tetratricopeptide repeat domain 16	1.2						LINC02555	long intergenic non-protein coding RNA 2555	1.34		H2AC11	H2A clustered histone 11	1.18
TTC38	tetratricopeptide repeat domain 38	1.15						LINC02649	long intergenic non-protein coding RNA 2649	1.36		H2AC12	H2A clustered histone 12	1.29
TTTY10	testis-specific transcript, Y-linked 10	1.31						LINC01347 (includes others)	long intergenic non-protein coding RNA 1347	1.4		H2AC13	H2A clustered histone 13	1.21
UBBP4	ubiquitin B pseudogene 4	-1.493						LIPT2	lipoyl(octanoyl) transferase 2	-1.333		H2AC14	H2A clustered histone 14	1.35
UNC93B1	unc-93 homolog B1, TLR signaling regulator	1.19						LOC154761	family with sequence similarity 115, member C pseudogene	-1.923		H2AC20	H2A clustered histone 20	1.19
UPB1	beta-ureidopropionase 1	1.39						LOC441666	zinc finger protein 91 pseudogene	-1.351		H2AC21	H2A clustered histone 21	1.22
USP11	ubiquitin specific peptidase 11	1.14						LOC728975	uncharacterized LOC728975	1.43		H2AC18/H2AC19	H2A clustered histone 18	2.84
UTP3	UTP3 small subunit processome component	-1.176						LOC729603	calcineurin like EF-hand protein 1 pseudogene	1.19		H2AJ	H2A.J histone	1.17
UTY	ubiquitously transcribed tetratricopeptide repeat containing, Y-linked	1.18						LOC729732	uncharacterized LOC729732	1.47		H2BC3	H2B clustered histone 3	1.27
WNT16	Wnt family member 16	-1.562						LOC100128398	uncharacterized LOC100128398	-1.149		H2BC4	H2B clustered histone 4	1.18
WNT10A	Wnt family member 10A	-1.282						LOC100287015	uncharacterized LOC100287015	-1.282		H2BC5	H2B clustered histone 5	1.17
XXBAC_B476C209	--	-1.333						LOC100287036	uncharacterized LOC100287036	1.64		H2BC6	H2B clustered histone 6	1.15
ZBTB16	zinc finger and BTB domain containing 16	1.16						LOC100996442	uncharacterized LOC100996442	5.18		H2BC7	H2B clustered histone 7	1.16
ZCCHC10	zinc finger CCHC-type containing 10	-1.316						LOC101928389	uncharacterized LOC101928389	1.49		H2BC8	H2B clustered histone 8	1.14
ZCCHC24	zinc finger CCHC-type containing 24	1.23						LOC101929295	uncharacterized LOC101929295	1.19		H2BC9	H2B clustered histone 9	1.14
ZNF208	zinc finger protein 208	-1.429						LOC101930085	uncharacterized LOC101930085	-1.19		H2BC10	H2B clustered histone 10	1.23
ZNF239	zinc finger protein 239	-1.333						LOC105377329	uncharacterized LOC105377329	1.49		H2BC11	H2B clustered histone 11	1.21
ZNF285	zinc finger protein 285	-1.299						LOC107984360	uncharacterized LOC107984360	1.6		H2BC13	H2B clustered histone 13	1.27
ZNF441	zinc finger protein 441	-1.282						LOC107987373	39S ribosomal protein L23, mitochondrial	-2.174		H2BC14	H2B clustered histone 14	1.43
ZNF571	zinc finger protein 571	-1.235						LOXL2	lysyl oxidase like 2	1.21		H2BU1	H2B.U histone 1	1.29
ZNF683	zinc finger protein 683	1.27						LPAR6	lysophosphatidic acid receptor 6	-1.37		H3C4	H3 clustered histone 4	-1.205
ZNF322P1	zinc finger protein 322 pseudogene 1	3.22						LSM5	LSM5 homolog, U6 small nuclear RNA and mRNA degradation associated	-1.25		H3C7	H3 clustered histone 7	1.24
ZNF876P	zinc finger protein 876, pseudogene	1.43						LTBP1	latent transforming growth factor beta binding protein 1	1.56		H3C8	H3 clustered histone 8	1.4
								LTF	lactotransferrin	1.58		H3C10	H3 clustered histone 10	1.23
								LUNAR1	--	1.33		H3C11	H3 clustered histone 11	1.18
								LYRM2	LYR motif containing 2	-1.205		H3C12	H3 clustered histone 12	1.36
								MAD2L1	mitotic arrest deficient 2 like 1	-1.235		H4C2	H4 clustered histone 2	1.2
								MAGEH1	MAGE family member H1	-1.22		H4C5	H4 clustered histone 5	1.17
								MAP3K7CL	MAP3K7 C-terminal like	1.33		H4C9	H4 clustered histone 9	1.23
								MAPK8IP1P2	mitogen-activated protein kinase 8 interacting protein 1 pseudogene 2	1.71		H4C11	H4 clustered histone 11	3.15
								MC1R	melanocortin 1 receptor	1.21		HAAO	3-hydroxyanthranilate 3,4-dioxygenase	-1.389
								MCEE	methylmalonyl-CoA epimerase	-1.205		HAVCR2	hepatitis A virus cellular receptor 2	1.12
								MCUR1	mitochondrial calcium uniporter regulator 1	1.2		HAX1	HCLS1 associated protein X-1	1.15
								MED7	mediator complex subunit 7	-1.19		HBD	hemoglobin subunit delta	1.4
								MED11	mediator complex subunit 11	-1.22		HBG1	hemoglobin subunit gamma 1	1.61
								MED12L	mediator complex subunit 12L	1.33		HBG2	hemoglobin subunit gamma 2	1.46
								MEF2D	myocyte enhancer factor 2D	1.21		HBM	hemoglobin subunit mu	1.35
								MEIS1	Meis homeobox 1	1.27		HBQ1	hemoglobin subunit theta 1	1.25
								METTL23	methyltransferase like 23	-1.176		HCST	hematopoietic cell signal transducer	1.16
								MFAP3L	microfibril associated protein 3 like	1.47		HDDC3	HD domain containing 3	1.18
								MGLL	monoglyceride lipase	1.5		HEATR5A	HEAT repeat containing 5A	-1.136
								mir-3648	microRNA 3648-1	77.72		HELLPAR	HELLP associated long non-coding RNA	-1.538
								MLC1	modulator of VRAC current 1	1.19		HELZ	helicase with zinc finger	-1.099
								MLLT1	MLLT1 super elongation complex subunit	1.21		HERC3	HECT and RLD domain containing E3 ubiquitin protein ligase 3	-1.099
								MMD	monocyte to macrophage differentiation associated	1.44		HERC2P9	hect domain and RLD 2 pseudogene 9	-1.163
								MMP8	matrix metallopeptidase 8	1.41		HES4	hes family bHLH transcription factor 4	1.46
								MMRN1	multimerin 1	1.37		HIP1	huntingtin interacting protein 1	-1.205
								MPIG6B	megakaryocyte and platelet inhibitory receptor G6b	1.45		HIVEP1	HIVEP zinc finger 1	-1.124
								MPL	MPL proto-oncogene, thrombopoietin receptor	1.8		HK2	hexokinase 2	-1.176
								MRM3	mitochondrial rRNA methyltransferase 3	-1.149		HLA-DPA1	major histocompatibility complex, class II, DP alpha 1	1.13
								MRPL3	mitochondrial ribosomal protein L3	-1.22		HLA-DPB1	major histocompatibility complex, class II, DP beta 1	1.14
								MRPL14	mitochondrial ribosomal protein L14	-1.176		HLA-DQA1	major histocompatibility complex, class II, DQ alpha 1	1.12
								MRPL15	mitochondrial ribosomal protein L15	-1.235		HLA-DQB2	major histocompatibility complex, class II, DQ beta 2	1.34
								MRPL17	mitochondrial ribosomal protein L17	-1.176		HLA-DRA	major histocompatibility complex, class II, DR alpha	1.23
								MRPL24	mitochondrial ribosomal protein L24	-1.19		HLA-DRB1	major histocompatibility complex, class II, DR beta 1	1.16
								MRPL32	mitochondrial ribosomal protein L32	-1.25		HLA-DRB5	major histocompatibility complex, class II, DR beta 5	1.18
								MRPL47	mitochondrial ribosomal protein L47	-1.333		HLA-G	major histocompatibility complex, class I, G	1.33
								MRPL54	mitochondrial ribosomal protein L54	-1.19		HLA-W	major histocompatibility complex, class I, W (pseudogene)	-1.235
								MRPL57	mitochondrial ribosomal protein L57	-1.205		HMGCL	3-hydroxy-3-methylglutaryl-CoA lyase	1.09
								MRPS14	mitochondrial ribosomal protein S14	-1.149		HNRNPH3	heterogeneous nuclear ribonucleoprotein H3	-1.22
								MRPS21	mitochondrial ribosomal protein S21	-1.205		HOPX	HOP homeobox	1.2
								MRPS33	mitochondrial ribosomal protein S33	-1.282		HS3ST3B1	heparan sulfate-glucosamine 3-sulfotransferase 3B1	1.11
								MS4A14	membrane spanning 4-domains A14	1.19		HSD17B10	hydroxysteroid 17-beta dehydrogenase 10	1.19
								MSC-AS1	MSC antisense RNA 1	1.24		HSPA8	heat shock protein family A (Hsp70) member 8	1.16
								MSRA	methionine sulfoxide reductase A	1.21		HSPE1	--	1.22
								MSS51	MSS51 mitochondrial translational activator	1.24		HYAL3	hyaluronidase 3	1.19
								MSTO2P	misato family member 2, pseudogene	1.28		ICAM4	intercellular adhesion molecule 4 (Landsteiner-Wiener blood group)	1.21
								MT-CYB	cytochrome b	1.37		IDO1	indoleamine 2,3-dioxygenase 1	1.43
								MT-ND1	NADH dehydrogenase, subunit 1 (complex I)	1.37		IDS	iduronate 2-sulfatase	-1.205
								MT-ND2	MTND2	1.43		IFI27	interferon alpha inducible protein 27	1.6
								MT-ND5	NADH dehydrogenase, subunit 5 (complex I)	1.52		IFI27L2	interferon alpha inducible protein 27 like 2	1.28
								MTURN	maturin, neural progenitor differentiation regulator homolog	1.18		IFIT1B	interferon induced protein with tetratricopeptide repeats 1B	1.33
								MYCT1	MYC target 1	1.89		IFITM1	interferon induced transmembrane protein 1	1.17
								MYL9	myosin light chain 9	1.66		IFNAR1	interferon alpha and beta receptor subunit 1	-1.163
								MYLK	myosin light chain kinase	1.37		IFNAR2	interferon alpha and beta receptor subunit 2	-1.124
								NAP1L3	nucleosome assembly protein 1 like 3	-1.316		IFRD2	interferon related developmental regulator 2	1.13
								NBPF25P	NBPF member 25, pseudogene	-1.961		IFT52	intraflagellar transport 52	1.14
								NDUFA4	NDUFA4 mitochondrial complex associated	-1.351		IGBP1	immunoglobulin binding protein 1	1.18
								NDUFA6	NADH:ubiquinone oxidoreductase subunit A6	-1.25		IGF2R	insulin like growth factor 2 receptor	-1.25
								NDUFS3	NADH:ubiquinone oxidoreductase core subunit S3	-1.176		IGFBP2	insulin like growth factor binding protein 2	1.3
								NEAT1	nuclear paraspeckle assembly transcript 1	1.45		IGFBP4	insulin like growth factor binding protein 4	1.25
								NEXMIF	neurite extension and migration factor	-1.351		IGFBP7	insulin like growth factor binding protein 7	1.2
								NFYB	nuclear transcription factor Y subunit beta	-1.333		IGHD	immunoglobulin heavy constant delta	-1.235
								NKAPD1	NKAP domain containing 1	-1.163		IGHG1	immunoglobulin heavy constant gamma 1 (G1m marker)	2.06
								NKX3-1	NK3 homeobox 1	1.37		IGHG3	immunoglobulin heavy constant gamma 3 (G3m marker)	1.3
								NMD3	NMD3 ribosome export adaptor	-1.235		IGHGP	immunoglobulin heavy constant gamma P (non-functional)	1.51
								NME1	NME/NM23 nucleoside diphosphate kinase 1	-1.449		IGHV1-69	immunoglobulin heavy variable 1-69	-2.128
								NOG	noggin	-1.333		IGHV4-39	immunoglobulin heavy variable 4-39	1.24
								NOP16	NOP16 nucleolar protein	-1.19		IGKC	immunoglobulin kappa constant	1.28
								NPIPB15 (includes others)	nuclear pore complex interacting protein family member B15	-1.316		IGKV1-6	immunoglobulin kappa variable 1-6	1.79
								NPM3	nucleophosmin/nucleoplasmin 3	-1.235		IGKV1-12	immunoglobulin kappa variable 1-12	1.57
								NRGN	neurogranin	1.39		IGKV1-16	immunoglobulin kappa variable 1-16	1.45
								NSA2	NSA2 ribosome biogenesis factor	-1.25		IGKV1-17	immunoglobulin kappa variable 1-17	1.42
								NSDHL	NAD(P) dependent steroid dehydrogenase-like	1.16		IGKV1-33	immunoglobulin kappa variable 1-33	1.26
								NT5M	5',3'-nucleotidase, mitochondrial	1.34		IGKV1-39	immunoglobulin kappa variable 1-39 (gene/pseudogene)	1.31
								NUDT12	nudix hydrolase 12	-1.887		IGKV2-28	immunoglobulin kappa variable 2-28	2.21
								NUDT4B	nudix hydrolase 4B	-2.632		IGKV3-20	immunoglobulin kappa variable 3-20	1.43
								NUFIP1	nuclear FMR1 interacting protein 1	-1.22		IGLC2	immunoglobulin lambda constant 2	1.24
								NUP37	nucleoporin 37	-1.176		IGLC3	immunoglobulin lambda constant 3 (Kern-Oz+ marker)	1.32
								OLFM4	olfactomedin 4	1.57		IGLV1-40	immunoglobulin lambda variable 1-40	1.41
								OR51R1P	olfactory receptor family 51 subfamily R member 1 pseudogene	1.38		IGLV1-44	immunoglobulin lambda variable 1-44	1.5
								OR52K2	olfactory receptor family 52 subfamily K member 2	1.53		IGLV2-11	immunoglobulin lambda variable 2-11	1.37
								OSBPL5	oxysterol binding protein like 5	1.16		IGLV3-21	immunoglobulin lambda variable 3-21	1.7
								OSTC	oligosaccharyltransferase complex non-catalytic subunit	-1.205		IKZF5	IKAROS family zinc finger 5	-1.22
								OXLD1	oxidoreductase like domain containing 1	-1.22		IL1R1	interleukin 1 receptor type 1	-1.299
								P3H4	prolyl 3-hydroxylase family member 4 (inactive)	-1.282		IL23A	interleukin 23 subunit alpha	1.2
								PA2G4P4	proliferation-associated 2G4 pseudogene 4	-1.176		ILF2	interleukin enhancer binding factor 2	1.17
								PAK1IP1	PAK1 interacting protein 1	-1.22		IMPDH2	inosine monophosphate dehydrogenase 2	1.1
								PAN3-AS1	PAN3 antisense RNA 1	-1.22		INKA2-AS1	INKA2 antisense RNA 1	1.25
								PANX2	pannexin 2	1.37		INO80D	INO80 complex subunit D	-1.163
								PARD3	par-3 family cell polarity regulator	1.52		INPP4A	inositol polyphosphate-4-phosphatase type I A	-1.099
								PARS2	prolyl-tRNA synthetase 2, mitochondrial	-1.19		IQCN	IQ motif containing N	-1.351
								PCBP3	poly(rC) binding protein 3	1.42		IRAG1-AS1	IRAG1 antisense RNA 1	-1.25
								PCBP3-OT1	--	1.6		ISCU	iron-sulfur cluster assembly enzyme	1.09
								PCSK6	proprotein convertase subtilisin/kexin type 6	1.63		ISG15	ISG15 ubiquitin like modifier	1.27
								PCYT1B	phosphate cytidylyltransferase 1, choline, beta	1.43		ITGA10	integrin subunit alpha 10	-1.299
								PDE3A	phosphodiesterase 3A	1.56		ITGB1P1	integrin subunit beta 1 pseudogene 1	1.17
								PDE5A	phosphodiesterase 5A	1.39		ITLN1	intelectin 1	1.35
								PDE6B	phosphodiesterase 6B	-1.19		ITM2C	integral membrane protein 2C	1.18
								PEAR1	platelet endothelial aggregation receptor 1	1.5		JOSD2	Josephin domain containing 2	1.22
								PF4	platelet factor 4	1.36		JTB	jumping translocation breakpoint	1.17
								PGBD4	piggyBac transposable element derived 4	-1.316		JUND	JunD proto-oncogene, AP-1 transcription factor subunit	1.15
								PGRMC1	progesterone receptor membrane component 1	1.23		KARS1	lysyl-tRNA synthetase 1	1.14
								PHB2	prohibitin 2	-1.149		KAT6A	lysine acetyltransferase 6A	-1.136
								PHBP19	prohibitin pseudogene 19	1.47		KAT6B	lysine acetyltransferase 6B	-1.149
								PHF5A	PHD finger protein 5A	-1.22		KB_431C15	--	-1.19
								PI4KAP1	phosphatidylinositol 4-kinase alpha pseudogene 1	1.32		KCND1	potassium voltage-gated channel subfamily D member 1	-1.515
								PIGC	phosphatidylinositol glycan anchor biosynthesis class C	1.16		KCNE1	potassium voltage-gated channel subfamily E regulatory subunit 1	-1.205
								PIP5K1B	phosphatidylinositol-4-phosphate 5-kinase type 1 beta	1.16		KDM1B	lysine demethylase 1B	-1.124
								PITPNM2	phosphatidylinositol transfer protein membrane associated 2	1.23		KDM3A	lysine demethylase 3A	-1.099
								PIWIL4	piwi like RNA-mediated gene silencing 4	1.25		KIAA1958	KIAA1958	-1.149
								PKHD1L1	PKHD1 like 1	1.55		KIF15	kinesin family member 15	1.68
								PLGLB1/PLGLB2	plasminogen like B2	-1.299		KIF1B	kinesin family member 1B	-1.19
								PLPP6	phospholipid phosphatase 6	-1.149		KLC3	kinesin light chain 3	1.24
								PLRG1	pleiotropic regulator 1	-1.163		KLF1	Kruppel like factor 1	1.21
								POLR1E	RNA polymerase I subunit E	-1.19		KLF7-IT1	KLF7 intronic transcript 1	-1.351
								POLR2K	RNA polymerase II subunit K	-1.449		KMO	kynurenine 3-monooxygenase	1.14
								POLR3GL	RNA polymerase III subunit G like	-1.282		KMT2C	lysine methyltransferase 2C	-1.176
								POU5F1P5	POU class 5 homeobox 1 pseudogene 5	1.23		KMT2E	lysine methyltransferase 2E (inactive)	-1.124
								PPA1	inorganic pyrophosphatase 1	-1.19		KNL1	kinetochore scaffold 1	1.34
								PPAT	phosphoribosyl pyrophosphate amidotransferase	-1.19		KRT1	keratin 1	1.2
								PPIAL4H	peptidylprolyl isomerase A like 4H	1.27		KRT77	keratin 77	1.55
								PPIAP22	peptidylprolyl isomerase A pseudogene 22	-1.19		KRT8P46	keratin 8 pseudogene 46	-1.149
								PRDX2P3	peroxiredoxin 2 pseudogene 3	1.34		LAMC1	laminin subunit gamma 1	-1.205
								PRKAR1B	protein kinase cAMP-dependent type I regulatory subunit beta	1.21		LAMTOR2	late endosomal/lysosomal adaptor, MAPK and MTOR activator 2	1.16
								PRKAR2B	protein kinase cAMP-dependent type II regulatory subunit beta	1.37		LAP3	leucine aminopeptidase 3	1.21
								PROS1	protein S	1.43		LATS2	large tumor suppressor kinase 2	-1.136
								PROSER2	proline and serine rich 2	1.37		LBH	LBH regulator of WNT signaling pathway	1.1
								PSMA4	proteasome 20S subunit alpha 4	-1.266		LCP2	lymphocyte cytosolic protein 2	-1.087
								PSMC6	proteasome 26S subunit, ATPase 6	-1.235		LDHB	lactate dehydrogenase B	1.19
								PTCH1	patched 1	1.13		LGALS1	galectin 1	1.17
								PTCRA	pre T cell antigen receptor alpha	1.52		LGALS3	galectin 3	1.15
								PTGES	prostaglandin E synthase	1.59		LILRA4	leukocyte immunoglobulin like receptor A4	1.19
								PTGIR	prostaglandin I2 receptor	1.18		LIMS1	LIM zinc finger domain containing 1	-1.176
								PTGS1	prostaglandin-endoperoxide synthase 1	1.38		LIMS2	LIM zinc finger domain containing 2	1.25
								PTK2	protein tyrosine kinase 2	1.17		LINC00278	long intergenic non-protein coding RNA 278	-1.408
								PTK7	protein tyrosine kinase 7 (inactive)	1.25		LINC00570	long intergenic non-protein coding RNA 570	1.28
								PTOV1-AS1	PTOV1 antisense RNA 1	-1.333		LINC00638	long intergenic non-protein coding RNA 638	-1.19
								R3HDM2	R3H domain containing 2	1.16		LINC00654	long intergenic non-protein coding RNA 654	-1.25
								RAB28	RAB28, member RAS oncogene family	-1.176		LINC00894	long intergenic non-protein coding RNA 894	-1.266
								RAB43	RAB43, member RAS oncogene family	1.18		LINC00958	long intergenic non-protein coding RNA 958	-1.389
								RAB11B	RAB11B, member RAS oncogene family	1.21		LINC01002	long intergenic non-protein coding RNA 1002	-1.316
								RAB27B	RAB27B, member RAS oncogene family	1.32		LINC01176	long intergenic non-protein coding RNA 1176	-1.22
								RADX	RPA1 related single stranded DNA binding protein, X-linked	-1.19		LINC01311	long intergenic non-protein coding RNA 1311	1.25
								RANBP6	RAN binding protein 6	-1.205		LINC01359	long intergenic non-protein coding RNA 1359	-1.389
								RASA3-IT1	RASA3 intronic transcript 1	1.28		LINC01572	long intergenic non-protein coding RNA 1572	-1.205
								RASSF7	Ras association domain family member 7	-1.19		LINC01762	long intergenic non-protein coding RNA 1762	-1.25
								RDH14	retinol dehydrogenase 14	-1.205		LINC01814	long intergenic non-protein coding RNA 1814	-1.266
								RECQL	RecQ like helicase	-1.149		LINC02035	long intergenic non-protein coding RNA 2035	-1.149
								RERE	arginine-glutamic acid dipeptide repeats	1.2		LINC02284	long intergenic non-protein coding RNA 2284	-1.205
								RETREG1	reticulophagy regulator 1	-1.205		LINC02363	long intergenic non-protein coding RNA 2363	-1.429
								RFX2	regulatory factor X2	1.37		LINC02422	long intergenic non-protein coding RNA 2422	-1.25
								RGPD4 (includes others)	RANBP2 like and GRIP domain containing 5	-1.724		LINC02649	long intergenic non-protein coding RNA 2649	-1.408
								RHNO1	RAD9-HUS1-RAD1 interacting nuclear orphan 1	-1.176		LINC-PINT	long intergenic non-protein coding RNA, p53 induced transcript	-1.136
								RHOBTB1	Rho related BTB domain containing 1	1.43		LOC220729	succinate dehydrogenase complex flavoprotein subunit A pseudogene	-1.111
								RIMBP3 (includes others)	RIMS binding protein 3	-2.632		LOC285638	uncharacterized LOC285638	-1.149
								RN7SKP80	RN7SK pseudogene 80	2.75		LOC339803	uncharacterized LOC339803	1.2
								RN7SKP90	RN7SK pseudogene 90	-1.37		LOC729732	uncharacterized LOC729732	-1.639
								RN7SKP227	RN7SK pseudogene 227	-1.389		LOC100130357	uncharacterized LOC100130357	-1.22
								RN7SKP255	RN7SK pseudogene 255	-1.235		LOC100287896	uncharacterized LOC100287896	1.35
								RN7SL328P	RNA, 7SL, cytoplasmic 328, pseudogene	1.29		LOC100289473	cytoskeleton associated protein 2-like pseudogene	-1.37
								RN7SL517P	RNA, 7SL, cytoplasmic 517, pseudogene	1.33		LOC100291105	uncharacterized LOC100291105	1.32
								RN7SL648P	--	1.29		LOC100505549	uncharacterized LOC100505549	-1.163
								RNASE3	ribonuclease A family member 3	1.3		LOC101927851	uncharacterized LOC101927851	-1.235
								RNF165	ring finger protein 165	1.21		LOC101928361	uncharacterized LOC101928361	-1.205
								RNLS	renalase, FAD dependent amine oxidase	-1.493		LOC102723373	uncharacterized LOC102723373	-1.205
								RNU1-4	RNA, U1 small nuclear 4	1.48		LOC102724330	uncharacterized LOC102724330	1.23
								RNU7-45P	RNA, U7 small nuclear 45 pseudogene	1.35		LPAR2	lysophosphatidic acid receptor 2	-1.205
								RORC	RAR related orphan receptor C	-1.299		LPP	LIM domain containing preferred translocation partner in lipoma	-1.149
								RP11-228M15.1	--	1.34		LRP6	LDL receptor related protein 6	-1.163
								RP11-38G5.4	--	1.25		LRRC28	leucine rich repeat containing 28	-1.111
								RP11-468E2.4	--	1.31		LRRC37A3 (includes others)	leucine rich repeat containing 37 member A3	-1.25
								RP11-734K23.9	--	4.21		LRRC37A4P	leucine rich repeat containing 37 member A4, pseudogene	-1.19
								RP11-92K2.2	--	-1.351		LRRFIP1	LRR binding FLII interacting protein 1	-1.124
								RP11_1017G215	--	-1.235		LRRN1	leucine rich repeat neuronal 1	-1.282
								RP11_102M111	--	1.26		LSM1	LSM1 homolog, mRNA degradation associated	1.26
								RP11_104L212	--	1.43		LUCAT1	lung cancer associated transcript 1	-1.22
								RP11_104L213	--	1.38		LY86	lymphocyte antigen 86	1.22
								RP11_1086F111	--	1.24		LYL1	LYL1 basic helix-loop-helix family member	1.18
								RP11_1094M147	--	-1.299		LYVE1	lymphatic vessel endothelial hyaluronan receptor 1	-1.25
								RP11_10E187	--	1.37		LYZ	lysozyme	1.17
								RP11_111M223	--	-1.515		MAF1	MAF1 homolog, negative regulator of RNA polymerase III	1.15
								RP11_1334A245	--	1.4		MAGEF1	MAGE family member F1	1.17
								RP11_147G73	--	1.29		MANF	mesencephalic astrocyte derived neurotrophic factor	1.16
								RP11_160E211	--	4.16		MANSC1	MANSC domain containing 1	-1.25
								RP11_16C12	--	1.29		MAP2K5	mitogen-activated protein kinase kinase 5	-1.136
								RP11_175B93	--	-1.538		MAP3K20	mitogen-activated protein kinase kinase kinase 20	-1.124
								RP11_180M157	--	-1.19		MAP4K4	mitogen-activated protein kinase kinase kinase kinase 4	-1.136
								RP11_182N229	--	1.2		MAPK13	mitogen-activated protein kinase 13	-1.163
								RP11_20O244	--	-1.639		MAPK8IP1P2	mitogen-activated protein kinase 8 interacting protein 1 pseudogene 2	-2
								RP11_216N147	--	1.24		MARCHF2	membrane associated ring-CH-type finger 2	1.16
								RP11_234A11	--	-1.37		MBD5	methyl-CpG binding domain protein 5	-1.136
								RP11_257O52	--	1.21		MCAT	malonyl-CoA-acyl carrier protein transacylase	1.14
								RP11_261P94	--	1.35		MCEE	methylmalonyl-CoA epimerase	1.2
								RP11_289I102	--	-1.235		MCTP2	multiple C2 and transmembrane domain containing 2	-1.149
								RP11_290F246	--	1.19		MDH1	malate dehydrogenase 1	1.18
								RP11_310J243	--	1.46		MEA1	male-enhanced antigen 1	1.15
								RP11_318K152	--	1.44		MEG3	maternally expressed 3	-1.639
								RP11_343H54	--	-1.316		MEMO1	mediator of cell motility 1	-1.266
								RP11_34P1315	--	1.72		METRN	meteorin, glial cell differentiation regulator	1.37
								RP11_355B112	--	-1.176		METTL18	methyltransferase like 18	1.28
								RP11_379F44	--	1.31		MGAM2	maltase-glucoamylase 2 (putative)	-1.493
								RP11_391L33	--	1.37		MGAM	maltase-glucoamylase	-1.316
								RP11_399K2112	--	1.47		MGST2	microsomal glutathione S-transferase 2	1.12
								RP11_405M124	--	-1.22		MICOS13	mitochondrial contact site and cristae organizing system subunit 13	1.3
								RP11_408P141	--	-1.389		MIF	macrophage migration inhibitory factor	1.23
								RP11_40C62	--	-1.351		mir-3648	microRNA 3648-1	-2.326
								RP11_423H23	--	1.48		MKRN4P	makorin ring finger protein 4, pseudogene	1.59
								RP11_424G141	--	1.68		MMP9	matrix metallopeptidase 9	-1.299
								RP11_425L101	--	-1.316		MPZ	myelin protein zero	-1.176
								RP11_426C221	--	1.27		MRPL15	mitochondrial ribosomal protein L15	1.23
								RP11_426C225	--	1.28		MRPL16	mitochondrial ribosomal protein L16	1.17
								RP11_426D191	--	1.28		MRPL17	mitochondrial ribosomal protein L17	1.15
								RP11_429P38	--	1.52		MRPL18	mitochondrial ribosomal protein L18	1.14
								RP11_43D42	--	1.36		MRPL20	mitochondrial ribosomal protein L20	1.13
								RP11_463O125	--	1.22		MRPL21	mitochondrial ribosomal protein L21	1.27
								RP11_466H181	--	-1.613		MRPL23	mitochondrial ribosomal protein L23	1.43
								RP11_46D61	--	-1.493		MRPL24	mitochondrial ribosomal protein L24	1.19
								RP11_46H1111	--	1.29		MRPL36	mitochondrial ribosomal protein L36	1.22
								RP11_488L1810	--	-1.471		MRPL41	mitochondrial ribosomal protein L41	1.18
								RP11_501J205	--	1.53		MRPL51	mitochondrial ribosomal protein L51	1.23
								RP11_514F35	--	1.28		MRPL52	mitochondrial ribosomal protein L52	1.11
								RP11_543P151	--	-1.449		MRPL53	mitochondrial ribosomal protein L53	1.2
								RP11_54A42	--	1.38		MRPL54	mitochondrial ribosomal protein L54	1.22
								RP11_555K122	--	1.38		MRPL58	mitochondrial ribosomal protein L58	1.24
								RP11_573G64	--	-1.282		MRPS7	mitochondrial ribosomal protein S7	1.22
								RP11_605F221	--	1.56		MRPS12	mitochondrial ribosomal protein S12	1.18
								RP11_61K93	--	-1.316		MRPS15	mitochondrial ribosomal protein S15	1.16
								RP11_690I212	--	1.29		MRPS21	mitochondrial ribosomal protein S21	1.17
								RP11_697N184	--	1.37		MRPS33	mitochondrial ribosomal protein S33	1.23
								RP11_69L165	--	-1.25		MRPS34	mitochondrial ribosomal protein S34	1.18
								RP11_705O18	--	-1.266		MRPS35	mitochondrial ribosomal protein S35	1.16
								RP11_708J191	--	-1.266		MRPS18B	mitochondrial ribosomal protein S18B	1.12
								RP11_727F1512	--	-1.37		MSR1	macrophage scavenger receptor 1	1.26
								RP11_73M188	--	1.16		MT-ND6	NADH dehydrogenase, subunit 6 (complex I)	-2.778
								RP11_7F178	--	1.21		MT-RNR2	l-rRNA	2.25
								RP11_800A34	--	1.28		MT2A	metallothionein 2A	1.17
								RP11_802E163	--	1.15		MTERF3	mitochondrial transcription termination factor 3	1.19
								RP11_803D51	--	1.48		MTHFS	methenyltetrahydrofolate synthetase	-1.235
								RP11_81H141	--	1.27		MTLN	mitoregulin	1.19
								RP13_554M157	--	1.25		MTMR10	myotubularin related protein 10	-1.099
								RP1_278E113	--	-2.083		MTND3P12	--	-1.333
								RP1_29C188	--	1.28		MTND4P14	MT-ND4 pseudogene 14	-1.351
								RP1_39G227	--	-1.515		MTND5P32	--	-1.587
								RP3_375P92	--	-1.587		MYBPH	myosin binding protein H	-1.429
								RP4_706A163	--	-1.923		MYDGF	myeloid derived growth factor	1.18
								RP4_758J246	--	1.25		MYL4	myosin light chain 4	1.29
								RP4_765C72	--	-1.389		MYL6	myosin light chain 6	1.3
								RP5_1000K242	--	1.31		MYL12A	myosin light chain 12A	1.14
								RP5_1112D68	--	1.28		MYL12B	myosin light chain 12B	1.19
								RP5_1126H102	--	1.27		MYO5A	myosin VA	-1.111
								RP5_867C241	--	1.48		MZB1	marginal zone B and B1 cell specific protein	1.29
								RP5_991G201	--	-1.266		NABP2	nucleic acid binding protein 2	1.15
								RPL3	ribosomal protein L3	-1.25		NACA	nascent polypeptide associated complex subunit alpha	1.14
								RPL4	ribosomal protein L4	-1.22		NANOGP4	Nanog homeobox pseudogene 4	-1.282
								RPL5	ribosomal protein L5	-1.266		NANS	N-acetylneuraminate synthase	1.12
								RPL6	ribosomal protein L6	-1.282		NAPEPLD	N-acyl phosphatidylethanolamine phospholipase D	-1.163
								RPL7	ribosomal protein L7	-1.695		NAXE	NAD(P)HX epimerase	1.18
								RPL9	ribosomal protein L9	-1.613		NBPF1 (includes others)	NBPF member 11	-1.389
								RPL10	ribosomal protein L10	-1.176		NCOA1	nuclear receptor coactivator 1	-1.136
								RPL11	ribosomal protein L11	-1.316		NCOA2	nuclear receptor coactivator 2	-1.136
								RPL15	ribosomal protein L15	-1.176		NDC80	NDC80 kinetochore complex component	1.22
								RPL23	ribosomal protein L23	-1.587		NDEL1	nudE neurodevelopment protein 1 like 1	-1.136
								RPL26	ribosomal protein L26	-1.562		NDUFA1	NADH:ubiquinone oxidoreductase subunit A1	1.35
								RPL27	ribosomal protein L27	-1.37		NDUFA2	NADH:ubiquinone oxidoreductase subunit A2	1.32
								RPL29	ribosomal protein L29	-1.19		NDUFA3	NADH:ubiquinone oxidoreductase subunit A3	1.15
								RPL31	ribosomal protein L31	-1.724		NDUFA4	NDUFA4 mitochondrial complex associated	1.31
								RPL34	ribosomal protein L34	-1.724		NDUFA8	NADH:ubiquinone oxidoreductase subunit A8	1.18
								RPL35	ribosomal protein L35	-1.351		NDUFA12	NADH:ubiquinone oxidoreductase subunit A12	1.2
								RPL37	ribosomal protein L37	-1.19		NDUFAF1	NADH:ubiquinone oxidoreductase complex assembly factor 1	1.18
								RPL39	ribosomal protein L39	-1.667		NDUFAF2	NADH:ubiquinone oxidoreductase complex assembly factor 2	1.31
								RPL10AP6	ribosomal protein L10a pseudogene 6	-1.22		NDUFB2	NADH:ubiquinone oxidoreductase subunit B2	1.22
								RPL13A	ribosomal protein L13a	-1.25		NDUFB3	NADH:ubiquinone oxidoreductase subunit B3	1.34
								RPL13AP5	ribosomal protein L13a pseudogene 5	-1.37		NDUFB7	NADH:ubiquinone oxidoreductase subunit B7	1.2
								RPL15P18	ribosomal protein L15 pseudogene 18	-1.515		NDUFB9	NADH:ubiquinone oxidoreductase subunit B9	1.14
								RPL18AP3	ribosomal protein L18a pseudogene 3	-1.22		NDUFB10	NADH:ubiquinone oxidoreductase subunit B10	1.18
								RPL22L1	ribosomal protein L22 like 1	-1.389		NDUFC1	NADH:ubiquinone oxidoreductase subunit C1	1.19
								RPL23AP2	ribosomal protein L23a pseudogene 2	2.56		NDUFS3	NADH:ubiquinone oxidoreductase core subunit S3	1.2
								RPL23AP42	ribosomal protein L23a pseudogene 42	-1.176		NDUFS5	NADH:ubiquinone oxidoreductase subunit S5	1.39
								RPL24P4	ribosomal protein L24 pseudogene 4	-1.351		NDUFS6	NADH:ubiquinone oxidoreductase subunit S6	1.14
								RPL39P3	ribosomal protein L39 pseudogene 3	-1.695		NEAT1	nuclear paraspeckle assembly transcript 1	-1.538
								RPL41P1	ribosomal protein L41 pseudogene 1	-3.704		NEB	nebulin	-1.333
								RPL4P6	ribosomal protein L4 pseudogene 6	1.3		NEDD8	NEDD8 ubiquitin like modifier	1.17
								RPL6P27	ribosomal protein L6 pseudogene 27	-1.282		NEIL3	nei like DNA glycosylase 3	1.81
								RPL7A	ribosomal protein L7a	-1.163		NFAT5	nuclear factor of activated T cells 5	-1.149
								RPL7P1	ribosomal protein L7 pseudogene 1	-1.852		NFE2L3	nuclear factor, erythroid 2 like 3	1.17
								RPL7P9	ribosomal protein L7 pseudogene 9	-1.639		NFKBIZ	NFKB inhibitor zeta	-1.087
								RPL9P9	--	-2.326		NFYA	nuclear transcription factor Y subunit alpha	-1.136
								RPLP0	ribosomal protein lateral stalk subunit P0	-1.235		NHS	NHS actin remodeling regulator	-1.22
								RPLP0P6	ribosomal protein lateral stalk subunit P0 pseudogene 6	-1.22		NHSL2	NHS like 2	-1.25
								RPS5	ribosomal protein S5	-1.205		NKAPP1	NFKB activating protein pseudogene 1	-1.163
								RPS6	ribosomal protein S6	-1.299		NLGN3	neuroligin 3	-1.389
								RPS7	ribosomal protein S7	-1.639		NME1	NME/NM23 nucleoside diphosphate kinase 1	1.23
								RPS8	ribosomal protein S8	-1.25		NME3	NME/NM23 nucleoside diphosphate kinase 3	1.17
								RPS9	ribosomal protein S9	-1.205		NME4	NME/NM23 nucleoside diphosphate kinase 4	1.15
								RPS13	ribosomal protein S13	-1.176		NOMO1 (includes others)	NODAL modulator 1	-1.266
								RPS14	ribosomal protein S14	-1.235		NOP10	NOP10 ribonucleoprotein	1.18
								RPS17	ribosomal protein S17	-1.408		NOP16	NOP16 nucleolar protein	1.18
								RPS18	ribosomal protein S18	-1.351		NPEPPS	aminopeptidase puromycin sensitive	-1.124
								RPS19	ribosomal protein S19	-1.176		NPEPPSP1	NPEPPS pseudogene 1	-1.515
								RPS20	ribosomal protein S20	-1.266		NPM1	nucleophosmin 1	1.18
								RPS21	ribosomal protein S21	-1.351		NPM1P39	nucleophosmin 1 pseudogene 39	1.34
								RPS23	ribosomal protein S23	-1.205		NQO2	N-ribosyldihydronicotinamide:quinone reductase 2	-1.163
								RPS24	ribosomal protein S24	-1.471		NRL	neural retina leucine zipper	1.21
								RPS27	ribosomal protein S27	-1.408		NRXN1	neurexin 1	-1.587
								RPS29	ribosomal protein S29	-1.316		NRXN3	neurexin 3	1.27
								RPS15A	ribosomal protein S15a	-1.351		NSA2	NSA2 ribosome biogenesis factor	1.19
								RPS26P6	ribosomal protein S26 pseudogene 6	3.17		NT5C	5', 3'-nucleotidase, cytosolic	1.16
								RPS26P8	ribosomal protein S26 pseudogene 8	1.71		NTAN1	N-terminal asparagine amidase	1.13
								RPS27A	ribosomal protein S27a	-1.282		NUTF2	nuclear transport factor 2	1.12
								RPS27AP16	ribosomal protein S27a pseudogene 16	-1.282		NUTM2B-AS1	NUTM2B antisense RNA 1	-1.205
								RPS3A	ribosomal protein S3A	-1.818		NXT1	nuclear transport factor 2 like export factor 1	1.23
								RPS3AP5	RPS3A pseudogene 5	-1.724		OAS3	2'-5'-oligoadenylate synthetase 3	-1.235
								RPS3AP6	RPS3A pseudogene 6	-1.754		OAZ1	ornithine decarboxylase antizyme 1	1.16
								RPS3AP26	RPS3A pseudogene 26	-1.887		ODC1	ornithine decarboxylase 1	1.14
								RPS4Y1	ribosomal protein S4 Y-linked 1	-1.316		OGFOD2	2-oxoglutarate and iron dependent oxygenase domain containing 2	1.16
								RPS7P1	ribosomal protein S7 pseudogene 1	-1.695		OPN3	opsin 3	1.15
								RPS7P10	ribosomal protein S7 pseudogene 10	-1.667		OR2W3	olfactory receptor family 2 subfamily W member 3	1.28
								RPSA	ribosomal protein SA	-1.235		OSBPL10	oxysterol binding protein like 10	-1.205
								RPSAP12	ribosomal protein SA pseudogene 12	-1.333		OST4	oligosaccharyltransferase complex subunit 4, non-catalytic	1.14
								RPSAP15	ribosomal protein SA pseudogene 15	-1.25		OTOF	otoferlin	-1.429
								RPSAP19	ribosomal protein SA pseudogene 19	-1.429		OXSM	3-oxoacyl-ACP synthase, mitochondrial	1.24
								RPSAP36	ribosomal protein SA pseudogene 36	1.41		P2RY14	purinergic receptor P2Y14	1.38
								RPSAP58	ribosomal protein SA pseudogene 58	-1.333		PA2G4	proliferation-associated 2G4	1.11
								RPUSD4	RNA pseudouridine synthase D4	-1.136		PAIP1	poly(A) binding protein interacting protein 1	1.18
								RSKR	ribosomal protein S6 kinase related	1.25		PAK2	p21 (RAC1) activated kinase 2	-1.163
								RSL24D1	ribosomal L24 domain containing 1	-1.613		PARD6B	par-6 family cell polarity regulator beta	-1.235
								RSU1	Ras suppressor protein 1	1.17		PARK7	Parkinsonism associated deglycase	1.14
								RWDD2A	RWD domain containing 2A	-1.471		PCF11-AS1	PCF11 antisense RNA 1	-1.235
								S100A8	S100 calcium binding protein A8	-1.449		PCNX1	pecanex 1	-1.149
								S100Z	S100 calcium binding protein Z	1.18		PDCD5	programmed cell death 5	1.13
								SAMD9	sterile alpha motif domain containing 9	-1.282		PDCD1LG2	programmed cell death 1 ligand 2	1.48
								SAMD14	sterile alpha motif domain containing 14	1.47		PDK4	pyruvate dehydrogenase kinase 4	-1.389
								SAP130	Sin3A associated protein 130	1.19		PDSS1	decaprenyl diphosphate synthase subunit 1	1.21
								SCAMP1-AS1	SCAMP1 antisense RNA 1	-1.37		PEAK1	pseudopodium enriched atypical kinase 1	-1.149
								SCARNA5	small Cajal body-specific RNA 5	-1.37		PEBP1	phosphatidylethanolamine binding protein 1	1.1
								SCARNA6	small Cajal body-specific RNA 6	-1.266		PELI2	pellino E3 ubiquitin protein ligase family member 2	-1.136
								SCCPDH	saccharopine dehydrogenase (putative)	-1.163		PEMT	phosphatidylethanolamine N-methyltransferase	1.18
								SCN1B	sodium voltage-gated channel beta subunit 1	1.51		PEX11B	peroxisomal biogenesis factor 11 beta	1.14
								SDAD1P1	SDA1 domain containing 1 pseudogene 1	-1.282		PFDN2	prefoldin subunit 2	1.19
								SEC14L5	SEC14 like lipid binding 5	1.67		PFDN5	prefoldin subunit 5	1.36
								SELENOM	selenoprotein M	-1.266		PFDN6	prefoldin subunit 6	1.15
								SELENOW	selenoprotein W	-1.19		PFKFB3	6-phosphofructo-2-kinase/fructose-2,6-biphosphatase 3	-1.235
								SELP	selectin P	1.46		PHB2	prohibitin 2	1.15
								SEPTIN5	septin 5	1.36		PHB	prohibitin	1.16
								SFR1	SWI5 dependent homologous recombination repair protein 1	-1.316		PHBP19	prohibitin pseudogene 19	-1.429
								SH3BGRL2	SH3 domain binding glutamate rich protein like 2	1.5		PHC1	polyhomeotic homolog 1	-1.235
								SH3GL1P1	SH3 domain containing GRB2 like 1, endophilin A2 pseudogene 1	1.19		PHEX	phosphate regulating endopeptidase homolog X-linked	-1.299
								SH3TC2	SH3 domain and tetratricopeptide repeats 2	1.45		PHF21A	PHD finger protein 21A	-1.19
								SIVA1	SIVA1 apoptosis inducing factor	-1.163		PIGW	phosphatidylinositol glycan anchor biosynthesis class W	1.19
								SLC15A4	solute carrier family 15 member 4	1.15		PIK3CG	phosphatidylinositol-4,5-bisphosphate 3-kinase catalytic subunit gamma	-1.099
								SLC25A53	solute carrier family 25 member 53	1.15		PIK3R6	phosphoinositide-3-kinase regulatory subunit 6	-1.205
								SLC2A5	solute carrier family 2 member 5	1.34		PINX1	PIN2 (TERF1) interacting telomerase inhibitor 1	-1.163
								SLC2A3P2	solute carrier family 2 member 3 pseudogene 2	1.33		PITHD1	PITH domain containing 1	1.17
								SLC35E3	solute carrier family 35 member E3	1.16		PKD1P5	polycystin 1, transient receptor potential channel interacting pseudogene 5	-1.25
								SLC4A10	solute carrier family 4 member 10	-1.25		PLAAT4	phospholipase A and acyltransferase 4	1.19
								SLC6A4	solute carrier family 6 member 4	1.45		PLB1	phospholipase B1	-1.37
								SMG1P5	SMG1 pseudogene 5	1.3		PLCG2	phospholipase C gamma 2	-1.136
								SMG1P7	SMG1 pseudogene 7	1.17		PLEKHA3	pleckstrin homology domain containing A3	-1.176
								SMIM20	small integral membrane protein 20	-1.351		PLGLB1/PLGLB2	plasminogen like B2	-1.515
								SMIM30	small integral membrane protein 30	-1.266		PLXNA2	plexin A2	-1.22
								SMIM11A	small integral membrane protein 11A	-3.226		PLXNB1	plexin B1	-1.449
								SMTN	smoothelin	1.31		PNO1	partner of NOB1 homolog	1.14
								SNHG5	small nucleolar RNA host gene 5	-1.176		PNP	purine nucleoside phosphorylase	1.22
								SNHG8	small nucleolar RNA host gene 8	-1.587		PNPLA1	patatin like phospholipase domain containing 1	-1.235
								SNHG29	small nucleolar RNA host gene 29	-1.205		PNPO	pyridoxamine 5'-phosphate oxidase	1.14
								SNORA5C	small nucleolar RNA, H/ACA box 5C	-1.25		POLE3	DNA polymerase epsilon 3, accessory subunit	1.16
								SNRPD2	small nuclear ribonucleoprotein D2 polypeptide	-1.316		POLR1D	RNA polymerase I and III subunit D	1.11
								SNRPG	small nuclear ribonucleoprotein polypeptide G	-1.37		POLR2G	RNA polymerase II subunit G	1.13
								SNX2	sorting nexin 2	-1.163		POLR2I	RNA polymerase II subunit I	1.17
								SNX3	sorting nexin 3	1.25		POLR2J	RNA polymerase II subunit J	1.18
								SPARC	secreted protein acidic and cysteine rich	1.53		POLR2L	RNA polymerase II subunit L	1.19
								SPP1	secreted phosphoprotein 1	1.49		POMGNT2	protein O-linked mannose N-acetylglucosaminyltransferase 2 (beta 1,4-)	1.18
								SPX	spexin hormone	1.53		POP4	POP4 homolog, ribonuclease P/MRP subunit	1.13
								SSH1	slingshot protein phosphatase 1	1.18		POP7	POP7 homolog, ribonuclease P/MRP subunit	1.17
								STOM	stomatin	1.19		POU2F1	POU class 2 homeobox 1	-1.163
								STON2	stonin 2	1.29		POU5F2	POU domain class 5, transcription factor 2	-1.282
								STPG1	sperm tail PG-rich repeat containing 1	-1.299		PPFIBP1	PPFIA binding protein 1	-1.22
								STX16-NPEPL1	STX16-NPEPL1 readthrough (NMD candidate)	1.21		PPIA	peptidylprolyl isomerase A	1.21
								SUSD1	sushi domain containing 1	1.12		PPIAP29	peptidylprolyl isomerase A pseudogene 29	1.19
								SYTL4	synaptotagmin like 4	1.43		PPIAP31	peptidylprolyl isomerase A pseudogene 31	1.37
								TACO1	translational activator of cytochrome c oxidase I	-1.163		PPIB	peptidylprolyl isomerase B	1.15
								TACSTD2	tumor associated calcium signal transducer 2	1.53		PPP1R35	protein phosphatase 1 regulatory subunit 35	1.16
								TAF7	TATA-box binding protein associated factor 7	-1.266		PPP1R12B	protein phosphatase 1 regulatory subunit 12B	-1.25
								TAGLN2	transgelin 2	1.19		PPP1R14BP3	protein phosphatase 1 regulatory inhibitor subunit 14B pseudogene 3	-1.22
								TAGLN2P1	transgelin 2 pseudogene 1	1.22		PPP4R1L	protein phosphatase 4 regulatory subunit 1 like (pseudogene)	-1.163
								TBC1D20	TBC1 domain family member 20	1.12		PPTC7	protein phosphatase targeting COQ7	-1.149
								TCAF1	TRPM8 channel associated factor 1	1.34		PRDM2	PR/SET domain 2	-1.149
								TDRP	testis development related protein	1.56		PRDM10	PR/SET domain 10	-1.136
								TEK	TEK receptor tyrosine kinase	1.52		PRDX1	peroxiredoxin 1	1.28
								TERF2	telomeric repeat binding factor 2	1.13		PRDX2	peroxiredoxin 2	1.23
								TFDP2	transcription factor Dp-2	1.13		PRDX5	peroxiredoxin 5	1.15
								TFPI	tissue factor pathway inhibitor	1.52		PRKCE	protein kinase C epsilon	-1.136
								THAP7	THAP domain containing 7	-1.176		PRKDC	protein kinase, DNA-activated, catalytic subunit	-1.149
								THBS1	thrombospondin 1	1.55		PRMT1	protein arginine methyltransferase 1	1.11
								TIGD1	tigger transposable element derived 1	-1.22		PRPS1	phosphoribosyl pyrophosphate synthetase 1	1.13
								TIGD2	tigger transposable element derived 2	-1.25		PRRC2C	proline rich coiled-coil 2C	-1.176
								TIMM8B	translocase of inner mitochondrial membrane 8 homolog B	-1.515		PRRG4	proline rich and Gla domain 4	-1.235
								TJP2	tight junction protein 2	1.16		PSMA5	proteasome 20S subunit alpha 5	1.11
								TKTL1	transketolase like 1	1.42		PSMB1	proteasome 20S subunit beta 1	1.2
								TMCO1-AS1	TMCO1 antisense RNA 1	-1.235		PSMB3	proteasome 20S subunit beta 3	1.13
								TMEM40	transmembrane protein 40	1.33		PSMB4	proteasome 20S subunit beta 4	1.14
								TMEM101	transmembrane protein 101	-1.136		PSMB6	proteasome 20S subunit beta 6	1.16
								TMEM107	transmembrane protein 107	-1.176		PSMB8	proteasome 20S subunit beta 8	1.13
								TMEM158	transmembrane protein 158 (gene/pseudogene)	1.71		PSMC3	proteasome 26S subunit, ATPase 3	1.17
								TMEM203	transmembrane protein 203	-1.136		PSMD4	proteasome 26S subunit, non-ATPase 4	1.14
								TMEM241	transmembrane protein 241	1.18		PSMD8	proteasome 26S subunit, non-ATPase 8	1.17
								TMEM251	transmembrane protein 251	-1.22		PSME2	proteasome activator subunit 2	1.2
								TMEM256	transmembrane protein 256	-1.389		PSMG3	proteasome assembly chaperone 3	1.26
								TMEM14C	transmembrane protein 14C	-1.205		PTP4A1	protein tyrosine phosphatase 4A1	-1.205
								TMEM198B	transmembrane protein 198B (pseudogene)	1.28		PTTG1	PTTG1 regulator of sister chromatid separation, securin	1.23
								TMEM50B	transmembrane protein 50B	-1.176		PUS3	pseudouridine synthase 3	1.24
								TMX1	thioredoxin related transmembrane protein 1	-1.19		PWAR5	Prader Willi/Angelman region RNA 5	-1.25
								TNFRSF25	TNF receptor superfamily member 25	-1.22		RAB32	RAB32, member RAS oncogene family	1.13
								TNFSF4	TNF superfamily member 4	1.32		RAB34	RAB34, member RAS oncogene family	1.19
								TOMM7	translocase of outer mitochondrial membrane 7	-1.333		RAB5IF	RAB5 interacting factor	1.21
								TPM4	tropomyosin 4	1.17		RABGAP1L	RAB GTPase activating protein 1 like	-1.099
								TPST1	tyrosylprotein sulfotransferase 1	1.29		RACK1	receptor for activated C kinase 1	1.13
								TPT1-AS1	TPT1 antisense RNA 1	1.2		RALGAPA2	Ral GTPase activating protein catalytic subunit alpha 2	-1.149
								TRAPPC2L	trafficking protein particle complex 2 like	-1.176		RALGAPB	Ral GTPase activating protein non-catalytic subunit beta	-1.087
								TRAV5	T cell receptor alpha variable 5	-1.37		RAN	RAN, member RAS oncogene family	1.19
								TRAV21	T cell receptor alpha variable 21	-1.235		RAP1GAP	RAP1 GTPase activating protein	1.43
								TRAV1-2	T cell receptor alpha variable 1-2	-1.333		RAPGEF5	Rap guanine nucleotide exchange factor 5	-1.408
								TRAV13-2	T cell receptor alpha variable 13-2	-1.351		RAPGEFL1	Rap guanine nucleotide exchange factor like 1	-1.408
								TRAV8-6	T cell receptor alpha variable 8-6	-1.282		RARS1	arginyl-tRNA synthetase 1	1.21
								TRBV9	T cell receptor beta variable 9	-1.299		RASAL2	RAS protein activator like 2	-1.493
								TRBV10-3	T cell receptor beta variable 10-3	-1.266		RC3H1	ring finger and CCCH-type domains 1	-1.176
								TRBV4-1	T cell receptor beta variable 4-1	-1.235		RCOR1	REST corepressor 1	-1.136
								TRBV5-1	T cell receptor beta variable 5-1	-1.316		REL	REL proto-oncogene, NF-kB subunit	-1.124
								TRBV6-2	T cell receptor beta variable 6-2 (gene/pseudogene)	-1.316		RFX3-AS1	RFX3 antisense RNA 1	-1.176
								TRDV2	T cell receptor delta variable 2	-1.37		RGCC	regulator of cell cycle	1.14
								TREML1	triggering receptor expressed on myeloid cells like 1	1.38		RGPD4 (includes others)	RANBP2 like and GRIP domain containing 5	-1.887
								TREML4	triggering receptor expressed on myeloid cells like 4	1.3		RGS5	regulator of G protein signaling 5	-1.205
								TRIM9	tripartite motif containing 9	1.42		RGS10	regulator of G protein signaling 10	1.17
								TRMT12	tRNA methyltransferase 12 homolog	-1.149		RHAG	Rh associated glycoprotein	1.27
								TRMT10A	tRNA methyltransferase 10A	-1.316		RHCE/RHD	Rh blood group D antigen	1.41
								TSC22D1	TSC22 domain family member 1	1.24		RILP	Rab interacting lysosomal protein	1.2
								TSPAN9	tetraspanin 9	1.54		RIMBP3 (includes others)	RIMS binding protein 3	2.97
								TSPAN33	tetraspanin 33	1.32		RN7SL600P	RNA, 7SL, cytoplasmic 600, pseudogene	-1.19
								TSPOAP1	TSPO associated protein 1	1.18		RNASE2	ribonuclease A family member 2	1.4
								TSSK6	testis specific serine kinase 6	-1.22		RNF5	ring finger protein 5	1.12
								TSTA3	tissue specific transplantation antigen P35B	1.23		RNF24	ring finger protein 24	-1.282
								TTC30A	tetratricopeptide repeat domain 30A	-1.351		RNF38	ring finger protein 38	-1.136
								TTC7B	tetratricopeptide repeat domain 7B	1.32		RNF111	ring finger protein 111	-1.111
								TTTY10	testis-specific transcript, Y-linked 10	1.26		RNF168	ring finger protein 168	-1.111
								TUBB1	tubulin beta 1 class VI	1.53		RNF181	ring finger protein 181	1.14
								TUBB6	tubulin beta 6 class V	-1.163		RNF187	ring finger protein 187	1.18
								TXNDC17	thioredoxin domain containing 17	-1.176		RP11-38G5.4	--	-1.266
								ULK1	unc-51 like autophagy activating kinase 1	1.26		RP11-666A8.13	--	-1.37
								UPB1	beta-ureidopropionase 1	1.26		RP11-734K23.9	--	-4.167
								UQCRQ	ubiquinol-cytochrome c reductase complex III subunit VII	-1.389		RP11-810P12.7	--	-1.333
								USP18	ubiquitin specific peptidase 18	-1.235		RP11-92K2.2	--	1.29
								USP44	ubiquitin specific peptidase 44	-1.351		RP11_10J212	--	-1.299
								UTP3	UTP3 small subunit processome component	-1.19		RP11_1334A245	--	-1.408
								UTY	ubiquitously transcribed tetratricopeptide repeat containing, Y-linked	1.18		RP11_138A91	--	-1.25
								UVSSA	UV stimulated scaffold protein A	1.19		RP11_138I14	--	1.49
								VCL	vinculin	1.19		RP11_139H155	--	-1.235
								VEPH1	ventricular zone expressed PH domain containing 1	1.44		RP11_141B142	--	-1.25
								VIL1	villin 1	1.63		RP11_142E91	--	-1.37
								VTI1B	vesicle transport through interaction with t-SNAREs 1B	1.14		RP11_154H233	--	-1.22
								VWF	von Willebrand factor	1.52		RP11_154J221	--	-1.19
								WASF3	WASP family member 3	1.51		RP11_159D122	--	-1.136
								WDR89	WD repeat domain 89	-1.25		RP11_16C12	--	-1.299
								WDR11-AS1	WDR11 antisense RNA 1	1.38		RP11_16E233	--	-1.408
								WHAMMP3	WAS protein homolog associated with actin, golgi membranes and microtubules pseudogene 3	1.31		RP11_16F152	--	1.7
								WHRN	whirlin	1.38		RP11_16K122	--	-1.22
								XK	X-linked Kx blood group	1.38		RP11_174O33	--	-1.299
								XRCC4	X-ray repair cross complementing 4	-1.235		RP11_177C121	--	-1.22
								YBX3P1	Y-box binding protein 3 pseudogene 1	1.43		RP11_196G183	--	-1.316
								YRDC	yrdC N6-threonylcarbamoyltransferase domain containing	-1.136		RP11_206L102	--	-1.282
								YWHAH	tyrosine 3-monooxygenase/tryptophan 5-monooxygenase activation protein eta	1.14		RP11_206L108	--	-1.205
								ZBED8	zinc finger BED-type containing 8	-1.471		RP11_214K319	--	-1.235
								ZCCHC10	zinc finger CCHC-type containing 10	-1.515		RP11_216N147	--	-1.316
								ZCRB1	zinc finger CCHC-type and RNA binding motif containing 1	-1.205		RP11_230F185	--	-1.25
								ZDBF2	zinc finger DBF-type containing 2	-1.25		RP11_242C192	--	-1.299
								ZFAND3	zinc finger AN1-type containing 3	1.18		RP11_256L63	--	-1.266
								ZFAND2A	zinc finger AN1-type containing 2A	-1.149		RP11_262H145	--	-1.351
								ZFP30	ZFP30 zinc finger protein	-1.25		RP11_288C181	--	-1.149
								ZFP62	ZFP62 zinc finger protein	-1.205		RP11_290F246	--	-1.316
								ZFP92	ZFP92 zinc finger protein	1.23		RP11_299A161	--	-1.266
								ZKSCAN2	zinc finger with KRAB and SCAN domains 2	-1.176		RP11_310J243	--	-1.667
								ZMIZ1	zinc finger MIZ-type containing 1	1.29		RP11_318K152	--	-1.333
								ZNF12	zinc finger protein 12	-1.136		RP11_320L112	--	-1.449
								ZNF14	zinc finger protein 14	-1.266		RP11_343H54	--	1.27
								ZNF22	zinc finger protein 22	-1.22		RP11_354B31	--	-1.471
								ZNF32	zinc finger protein 32	-1.266		RP11_357N136	--	-1.266
								ZNF77	zinc finger protein 77	-1.22		RP11_358B237	--	-1.22
								ZNF132	zinc finger protein 132	-1.235		RP11_35O152	--	-1.266
								ZNF141	zinc finger protein 141	-1.22		RP11_38G52	--	-1.449
								ZNF180	zinc finger protein 180	-1.22		RP11_424G141	--	1.26
								ZNF181	zinc finger protein 181	-1.333		RP11_425L101	--	1.29
								ZNF184	zinc finger protein 184	-1.205		RP11_427L152	--	-1.25
								ZNF197	zinc finger protein 197	-1.149		RP11_430C75	--	-1.22
								ZNF208	zinc finger protein 208	-1.587		RP11_447D113	--	-1.176
								ZNF221	zinc finger protein 221	-1.333		RP11_44F144	--	-1.235
								ZNF222	zinc finger protein 222	-1.266		RP11_44F146	--	-1.25
								ZNF226	zinc finger protein 226	-1.163		RP11_44F148	--	-1.282
								ZNF239	zinc finger protein 239	-1.471		RP11_44F1410	--	-1.316
								ZNF268	zinc finger protein 268	-1.282		RP11_463O125	--	-1.235
								ZNF287	zinc finger protein 287	-1.22		RP11_466H181	--	1.56
								ZNF304	zinc finger protein 304	-1.136		RP11_474P27	--	-1.282
								ZNF329	zinc finger protein 329	-1.124		RP11_50D91	--	6.99
								ZNF347	zinc finger protein 347	-1.235		RP11_519C121	--	-1.266
								ZNF367	zinc finger protein 367	1.23		RP11_54A42	--	-1.282
								ZNF416	zinc finger protein 416	-1.25		RP11_563N66	--	-1.316
								ZNF420	zinc finger protein 420	-1.22		RP11_582E36	--	-1.25
								ZNF432	zinc finger protein 432	-1.25		RP11_587D211	--	1.49
								ZNF439	zinc finger protein 439	-1.149		RP11_589F54	--	1.96
								ZNF440	zinc finger protein 440	-1.136		RP11_592N211	--	1.59
								ZNF441	zinc finger protein 441	-1.562		RP11_5N193	--	-1.176
								ZNF442	zinc finger protein 442	-1.389		RP11_613M52	--	1.84
								ZNF468	zinc finger protein 468	-1.163		RP11_617F232	--	-1.282
								ZNF471	zinc finger protein 471	-1.408		RP11_61L191	--	-1.389
								ZNF480	zinc finger protein 480	-1.266		RP11_631M63	--	-1.19
								ZNF485	zinc finger protein 485	-1.235		RP11_631N162	--	-1.176
								ZNF501	zinc finger protein 501	-1.316		RP11_632C17__A1	--	1.17
								ZNF510	zinc finger protein 510	-1.235		RP11_65L32	--	-1.149
								ZNF527	zinc finger protein 527	-1.205		RP11_65L33	--	-1.149
								ZNF543	zinc finger protein 543	-1.149		RP11_661A128	--	1.31
								ZNF547	zinc finger protein 547	-1.25		RP11_678G144	--	-1.333
								ZNF550	zinc finger protein 550	-1.176		RP11_775J232	--	-1.333
								ZNF551	zinc finger protein 551	-1.136		RP11_803D51	--	-1.333
								ZNF555	zinc finger protein 555	-1.235		RP11_81A14	--	-1.639
								ZNF558	zinc finger protein 558	-1.136		RP11_864N72	--	1.24
								ZNF561	zinc finger protein 561	-1.149		RP11_888D104	--	-1.389
								ZNF563	zinc finger protein 563	-1.333		RP11_925D83	--	-1.429
								ZNF570	zinc finger protein 570	-1.163		RP11_996F156	--	-1.333
								ZNF584	zinc finger protein 584	-1.19		RP13_20L1410	--	-1.25
								ZNF594	zinc finger protein 594	-1.266		RP13_216E224	--	-1.299
								ZNF596	zinc finger protein 596	-1.176		RP13_585F241	--	1.47
								ZNF605	zinc finger protein 605	-1.163		RP1_278E113	--	1.87
								ZNF624	zinc finger protein 624	-1.163		RP1_80N23	--	-1.351
								ZNF627	zinc finger protein 627	-1.266		RP3_425C144	--	-1.19
								ZNF658	zinc finger protein 658	-1.333		RP3_508I1514	--	-1.389
								ZNF665	zinc finger protein 665	-1.235		RP4_575N62	--	1.94
								ZNF699	zinc finger protein 699	-1.235		RP4_576H242	--	-1.266
								ZNF721	zinc finger protein 721	-1.235		RP4_706A163	--	1.55
								ZNF737	zinc finger protein 737	-1.163		RP4_765C72	--	1.87
								ZNF761	zinc finger protein 761	-1.205		RP5_1000K242	--	-1.235
								ZNF765	zinc finger protein 765	-1.316		RP5_1041C103	--	-1.25
								ZNF766	zinc finger protein 766	-1.124		RP5_1057I206	--	-1.176
								ZNF781	zinc finger protein 781	-1.351		RP5_1074L14	--	-1.176
								ZNF790	zinc finger protein 790	-1.235		RP5_1085F173	--	-1.149
								ZNF813	zinc finger protein 813	-1.25		RP5_1112D68	--	-1.266
								ZNF816	zinc finger protein 816	-1.282		RP5_858L171	--	-1.19
								ZNF836	zinc finger protein 836	-1.163		RP5_940J59	--	1.42
								ZNF844	zinc finger protein 844	-1.37		RP5_981O72	--	-1.266
								ZNF845	zinc finger protein 845	-1.429		RPA2	replication protein A2	1.13
								ZNF860	zinc finger protein 860	-1.282		RPL4	ribosomal protein L4	1.18
								ZNF879	zinc finger protein 879	-1.299		RPL5	ribosomal protein L5	1.26
								ZNF204P	zinc finger protein 204, pseudogene	-1.389		RPL6	ribosomal protein L6	1.27
								ZNF252P	zinc finger protein 252, pseudogene	-1.149		RPL7	ribosomal protein L7	1.63
								ZNF354A	zinc finger protein 354A	-1.163		RPL10	ribosomal protein L10	1.16
								ZNF354C	zinc finger protein 354C	-1.176		RPL12	ribosomal protein L12	1.18
								ZNF436-AS1	ZNF436 antisense RNA 1	-1.299		RPL13	ribosomal protein L13	1.19
								ZNF75A	zinc finger protein 75a	-1.136		RPL14	ribosomal protein L14	1.15
								ZNF826P	zinc finger protein 826, pseudogene	-1.266		RPL18	ribosomal protein L18	1.13
								ZNF876P	zinc finger protein 876, pseudogene	1.25		RPL19	ribosomal protein L19	1.17
								ZSCAN12	zinc finger and SCAN domain containing 12	-1.205		RPL21	ribosomal protein L21	1.44
								ZSCAN30	zinc finger and SCAN domain containing 30	-1.124		RPL22	ribosomal protein L22	1.14
								ZSCAN5A	zinc finger and SCAN domain containing 5A	1.16		RPL23	ribosomal protein L23	1.44
												RPL24	ribosomal protein L24	1.28
												RPL26	ribosomal protein L26	1.53
												RPL29	ribosomal protein L29	1.16
												RPL30	ribosomal protein L30	1.3
												RPL31	ribosomal protein L31	1.58
												RPL32	ribosomal protein L32	1.22
												RPL34	ribosomal protein L34	1.58
												RPL35	ribosomal protein L35	1.33
												RPL36	ribosomal protein L36	1.17
												RPL37	ribosomal protein L37	1.2
												RPL38	ribosomal protein L38	1.14
												RPL39	ribosomal protein L39	1.52
												RPL10A	ribosomal protein L10a	1.18
												RPL10AP6	ribosomal protein L10a pseudogene 6	1.24
												RPL13AP5	ribosomal protein L13a pseudogene 5	1.32
												RPL13P12	ribosomal protein L13 pseudogene 12	1.25
												RPL15P3	ribosomal protein L15 pseudogene 3	1.27
												RPL18AP3	ribosomal protein L18a pseudogene 3	1.16
												RPL21P3	ribosomal protein L21 pseudogene 3	2.13
												RPL21P16	ribosomal protein L21 pseudogene 16	1.59
												RPL21P75	ribosomal protein L21 pseudogene 75	1.42
												RPL21P123	ribosomal protein L21 pseudogene 123	-1.37
												RPL21P134	ribosomal protein L21 pseudogene 134	-14.286
												RPL22L1	ribosomal protein L22 like 1	1.43
												RPL22P1	ribosomal protein L22 pseudogene 1	1.42
												RPL23A	ribosomal protein L23a	1.17
												RPL23AP42	ribosomal protein L23a pseudogene 42	1.12
												RPL24P4	ribosomal protein L24 pseudogene 4	1.42
												RPL27A	ribosomal protein L27a	1.19
												RPL29P14	ribosomal protein L29 pseudogene 14	-1.266
												RPL35A	ribosomal protein L35a	1.31
												RPL36AL	ribosomal protein L36a like	1.18
												RPL37A	ribosomal protein L37a	1.18
												RPL41P1	ribosomal protein L41 pseudogene 1	-2.941
												RPL41P2	ribosomal protein L41 pseudogene 2	1.82
												RPL4P4	ribosomal protein L4 pseudogene 4	1.26
												RPL5P34	ribosomal protein L5 pseudogene 34	1.27
												RPL6P27	ribosomal protein L6 pseudogene 27	1.26
												RPL7A	ribosomal protein L7a	1.15
												RPL7AP31	ribosomal protein L7a pseudogene 31	1.35
												RPL7P9	ribosomal protein L7 pseudogene 9	1.58
												RPL9P9	--	3.6
												RPLP2	ribosomal protein lateral stalk subunit P2	1.14
												RPS2	ribosomal protein S2	1.14
												RPS3	ribosomal protein S3	1.18
												RPS5	ribosomal protein S5	1.2
												RPS7	ribosomal protein S7	1.47
												RPS8	ribosomal protein S8	1.21
												RPS10	ribosomal protein S10	1.3
												RPS11	ribosomal protein S11	1.2
												RPS12	ribosomal protein S12	1.23
												RPS13	ribosomal protein S13	1.2
												RPS14	ribosomal protein S14	1.21
												RPS15	ribosomal protein S15	1.19
												RPS19	ribosomal protein S19	1.14
												RPS20	ribosomal protein S20	1.28
												RPS21	ribosomal protein S21	1.29
												RPS23	ribosomal protein S23	1.24
												RPS25	ribosomal protein S25	1.29
												RPS26	ribosomal protein S26	1.24
												RPS15AP29	ribosomal protein S15a pseudogene 29	-1.299
												RPS20P10	ribosomal protein S20 pseudogene 10	1.96
												RPS20P14	ribosomal protein S20 pseudogene 14	1.51
												RPS27A	ribosomal protein S27a	1.26
												RPS27AP12	ribosomal protein S27a pseudogene 12	-1.205
												RPS27AP16	ribosomal protein S27a pseudogene 16	1.33
												RPS2P46	ribosomal protein S2 pseudogene 46	1.15
												RPS3A	ribosomal protein S3A	1.57
												RPS3AP6	RPS3A pseudogene 6	1.58
												RPS3P2	ribosomal protein S3 pseudogene 2	-1.235
												RPS4X	ribosomal protein S4 X-linked	1.16
												RPS6KA5	ribosomal protein S6 kinase A5	-1.149
												RPSA	ribosomal protein SA	1.2
												RPSAP16	ribosomal protein SA pseudogene 16	-1.235
												RPSAP19	ribosomal protein SA pseudogene 19	1.28
												RRAGA	Ras related GTP binding A	1.13
												RRP9	ribosomal RNA processing 9, U3 small nucleolar RNA binding protein	1.2
												RSL1D1	ribosomal L1 domain containing 1	1.12
												RSPH3	radial spoke head 3	-1.136
												RTP4	receptor transporter protein 4	1.24
												RUBCNL	rubicon like autophagy enhancer	-1.22
												RUNX2	RUNX family transcription factor 2	-1.124
												RWDD2B	RWD domain containing 2B	1.21
												S100A4	S100 calcium binding protein A4	1.18
												S100A6	S100 calcium binding protein A6	1.17
												S100A8	S100 calcium binding protein A8	1.58
												S100A9	S100 calcium binding protein A9	1.28
												S100P	S100 calcium binding protein P	1.4
												S100Z	S100 calcium binding protein Z	-1.205
												SAE1	SUMO1 activating enzyme subunit 1	1.11
												SAP130	Sin3A associated protein 130	-1.163
												SBDS	SBDS ribosome maturation factor	1.19
												SBDSP1	SBDS pseudogene 1	1.19
												SCAND1	SCAN domain containing 1	1.2
												SCD5	stearoyl-CoA desaturase 5	-1.266
												SCN9A	sodium voltage-gated channel alpha subunit 9	-1.299
												SDAD1P1	SDA1 domain containing 1 pseudogene 1	1.24
												SDF2L1	stromal cell derived factor 2 like 1	1.2
												SEC13	SEC13 homolog, nuclear pore and COPII coat complex component	1.09
												SEC61B	SEC61 translocon subunit beta	1.14
												SELENBP1	selenium binding protein 1	1.24
												SELENOW	selenoprotein W	1.13
												SERF2	small EDRK-rich factor 2	1.2
												SERTAD2	SERTA domain containing 2	-1.19
												SF3B5	splicing factor 3b subunit 5	1.21
												SHARPIN	SHANK associated RH domain interactor	1.16
												SIGLEC1	sialic acid binding Ig like lectin 1	-1.493
												SIK3	SIK family kinase 3	-1.163
												SIPA1L1	signal induced proliferation associated 1 like 1	-1.136
												SLC12A6	solute carrier family 12 member 6	-1.136
												SLC1A5	solute carrier family 1 member 5	1.18
												SLC22A1	solute carrier family 22 member 1	-1.282
												SLC25A5	solute carrier family 25 member 5	1.12
												SLC25A38	solute carrier family 25 member 38	1.13
												SLC26A8	solute carrier family 26 member 8	-1.493
												SLC2A1	solute carrier family 2 member 1	1.12
												SLC37A3	solute carrier family 37 member 3	-1.149
												SLCO3A1	solute carrier organic anion transporter family member 3A1	-1.149
												SLCO4C1	solute carrier organic anion transporter family member 4C1	-1.176
												SLED1	proteoglycan 3, pro eosinophil major basic protein 2 pseudogene	-1.37
												SLIT1	slit guidance ligand 1	-1.449
												SLPI	secretory leukocyte peptidase inhibitor	1.29
												SLX4IP	SLX4 interacting protein	-1.124
												SMAGP	small cell adhesion glycoprotein	1.19
												SMG1	SMG1 nonsense mediated mRNA decay associated PI3K related kinase	-1.099
												SMG7	SMG7 nonsense mediated mRNA decay factor	-1.149
												SMG1P4	SMG1 pseudogene 4	-1.389
												SMG1P5	SMG1 pseudogene 5	-1.149
												SMIM20	small integral membrane protein 20	1.28
												SMIM24	small integral membrane protein 24	1.22
												SMIM26	small integral membrane protein 26	1.25
												SMIM35	small integral membrane protein 35	-1.282
												SNAPIN	SNAP associated protein	1.17
												SNHG6	small nucleolar RNA host gene 6	1.2
												SNHG8	small nucleolar RNA host gene 8	1.42
												SNHG16	small nucleolar RNA host gene 16	1.08
												SNHG32	small nucleolar RNA host gene 32	1.18
												SNRNP25	small nuclear ribonucleoprotein U11/U12 subunit 25	1.2
												SNRPD2	small nuclear ribonucleoprotein D2 polypeptide	1.28
												SNRPE	small nuclear ribonucleoprotein polypeptide E	1.32
												SNU13	small nuclear ribonucleoprotein 13	1.11
												SOCS1	suppressor of cytokine signaling 1	1.3
												SOD1	superoxide dismutase 1	1.17
												SON	SON DNA and RNA binding protein	-1.111
												SORL1	sortilin related receptor 1	-1.205
												SPAG7	sperm associated antigen 7	1.18
												SPCS2	signal peptidase complex subunit 2	-1.19
												SPDL1	spindle apparatus coiled-coil protein 1	1.19
												SPEN	spen family transcriptional repressor	-1.136
												SPRY3	sprouty RTK signaling antagonist 3	-1.205
												SPSB1	splA/ryanodine receptor domain and SOCS box containing 1	1.2
												SRPRB	SRP receptor subunit beta	1.14
												SS18L2	SS18 like 2	1.25
												SSNA1	SS nuclear autoantigen 1	1.15
												SSR2	signal sequence receptor subunit 2	1.13
												SSR4	signal sequence receptor subunit 4	1.18
												ST6GALNAC4	ST6 N-acetylgalactosaminide alpha-2,6-sialyltransferase 4	1.23
												STK11	serine/threonine kinase 11	1.16
												STMN1	stathmin 1	1.18
												STOML2	stomatin like 2	1.11
												STRN	striatin	-1.111
												STX16	syntaxin 16	-1.22
												SULT1B1	sulfotransferase family 1B member 1	-1.282
												SUPT4H1	SPT4 homolog, DSIF elongation factor subunit	1.13
												SVBP	small vasohibin binding protein	1.19
												SVIL	supervillin	-1.22
												SVIL2P	supervillin family member 2, pseudogene	-1.333
												TAF1	TATA-box binding protein associated factor 1	-1.111
												TANC2	tetratricopeptide repeat, ankyrin repeat and coiled-coil containing 2	-1.235
												TANGO2	transport and golgi organization 2 homolog	1.13
												TARS1	threonyl-tRNA synthetase 1	1.13
												TAS2R60	taste 2 receptor member 60	-1.429
												TCAF1	TRPM8 channel associated factor 1	-1.389
												TCEA1P2	transcription elongation factor A1 pseudogene 2	1.18
												TCF3	transcription factor 3	1.13
												TCTN2	tectonic family member 2	-1.19
												TEF	TEF transcription factor, PAR bZIP family member	1.13
												TENM1	teneurin transmembrane protein 1	-1.136
												TENM4	teneurin transmembrane protein 4	-1.493
												TERF2IP	TERF2 interacting protein	1.09
												TESC	tescalcin	1.18
												TESMIN	testis expressed metallothionein like protein	-1.149
												TET3	tet methylcytosine dioxygenase 3	-1.176
												TFB2M	transcription factor B2, mitochondrial	1.2
												TFR2	transferrin receptor 2	1.21
												TFRC	transferrin receptor	1.18
												TG	thyroglobulin	-1.266
												TGFB3	transforming growth factor beta 3	-1.266
												THAP11	THAP domain containing 11	1.11
												THG1L	tRNA-histidine guanylyltransferase 1 like	1.18
												TIFAB	TIFA inhibitor	1.2
												TIMM17A	translocase of inner mitochondrial membrane 17A	1.17
												TIMM17B	translocase of inner mitochondrial membrane 17B	1.13
												TIMM8B	translocase of inner mitochondrial membrane 8 homolog B	1.32
												TLE4	TLE family member 4, transcriptional corepressor	-1.149
												TMA7	translation machinery associated 7 homolog	1.43
												TMCC1	transmembrane and coiled-coil domain family 1	-1.176
												TMCC2	transmembrane and coiled-coil domain family 2	1.23
												TMCC3	transmembrane and coiled-coil domain family 3	-1.149
												TMED1	transmembrane p24 trafficking protein 1	1.18
												TMED9	transmembrane p24 trafficking protein 9	1.12
												TMEM141	transmembrane protein 141	1.17
												TMEM158	transmembrane protein 158 (gene/pseudogene)	1.33
												TMEM208	transmembrane protein 208	1.15
												TMEM219	transmembrane protein 219	1.12
												TMEM106C	transmembrane protein 106C	1.13
												TMEM14C	transmembrane protein 14C	1.22
												TMEM176B	transmembrane protein 176B	1.18
												TMEM183B	transmembrane protein 183B	1.27
												TMIGD2	transmembrane and immunoglobulin domain containing 2	1.19
												TMSB10/TMSB4X	thymosin beta 4 X-linked	1.24
												TMSB4XP6	TMSB4X pseudogene 6	1.24
												TMSB4XP8	TMSB4X pseudogene 8	1.2
												TMTC1	transmembrane O-mannosyltransferase targeting cadherins 1	-1.22
												TNFRSF9	TNF receptor superfamily member 9	-1.299
												TNRC6B	trinucleotide repeat containing adaptor 6B	-1.124
												TOMM7	translocase of outer mitochondrial membrane 7	1.29
												TOMM22	translocase of outer mitochondrial membrane 22	1.15
												TOR1A	torsin family 1 member A	1.11
												TP53BP1	tumor protein p53 binding protein 1	-1.111
												TPI1	triosephosphate isomerase 1	1.12
												TPI1P1	triosephosphate isomerase 1 pseudogene 1	1.15
												TPPP3	tubulin polymerization promoting protein family member 3	-1.22
												TPST2	tyrosylprotein sulfotransferase 2	1.1
												TPT1	tumor protein, translationally-controlled 1	1.33
												TRAJ7	T cell receptor alpha joining 7	-1.282
												TRAPPC6A	trafficking protein particle complex 6A	1.18
												TRAV16	T cell receptor alpha variable 16	1.27
												TRDC	T cell receptor delta constant	1.21
												TRDV2	T cell receptor delta variable 2	1.45
												TRIB3	tribbles pseudokinase 3	1.14
												TRIR	telomerase RNA component interacting RNase	1.16
												TRMT112	tRNA methyltransferase subunit 11-2	1.16
												TSPO2	translocator protein 2	1.45
												TSTA3	tissue specific transplantation antigen P35B	1.22
												TTC1	tetratricopeptide repeat domain 1	1.11
												TTC21A	tetratricopeptide repeat domain 21A	-1.266
												TUBD1	tubulin delta 1	1.14
												TXLNGY	taxilin gamma pseudogene, Y-linked	1.58
												TXNDC5	thioredoxin domain containing 5	1.2
												TYRO3P	TYRO3P protein tyrosine kinase pseudogene	-1.22
												U2AF1/U2AF1L5	U2 small nuclear RNA auxiliary factor 1	-1.282
												U91328.1	--	-1.266
												UBA52	ubiquitin A-52 residue ribosomal protein fusion product 1	1.18
												UBAC1	UBA domain containing 1	1.15
												UBAC2-AS1	UBAC2 antisense RNA 1	1.33
												UBB	ubiquitin B	1.21
												UBE2S	ubiquitin conjugating enzyme E2 S	1.19
												UBL5	ubiquitin like 5	1.26
												UBXN6	UBX domain protein 6	1.2
												UFSP1	UFM1 specific peptidase 1 (inactive)	1.26
												UMAD1	UBAP1-MVB12-associated (UMA) domain containing 1	-1.149
												UNG	uracil DNA glycosylase	1.13
												UQCC3	ubiquinol-cytochrome c reductase complex assembly factor 3	1.22
												UQCR10	ubiquinol-cytochrome c reductase, complex III subunit X	1.22
												UQCR11	ubiquinol-cytochrome c reductase, complex III subunit XI	1.16
												UQCRB	ubiquinol-cytochrome c reductase binding protein	1.32
												UQCRH	ubiquinol-cytochrome c reductase hinge protein	1.26
												UQCRHL	ubiquinol-cytochrome c reductase hinge protein like	1.32
												UQCRQ	ubiquinol-cytochrome c reductase complex III subunit VII	1.31
												URM1	ubiquitin related modifier 1	1.13
												UROD	uroporphyrinogen decarboxylase	1.13
												USP9Y	ubiquitin specific peptidase 9 Y-linked	1.23
												UTP14A	UTP14A small subunit processome component	1.13
												UXT	ubiquitously expressed prefoldin like chaperone	1.17
												VAMP5	vesicle associated membrane protein 5	1.25
												VAMP8	vesicle associated membrane protein 8	1.22
												VDAC3	voltage dependent anion channel 3	1.17
												VOPP1	VOPP1 WW domain binding protein	1.13
												VPS25	vacuolar protein sorting 25 homolog	1.17
												VRK1	VRK serine/threonine kinase 1	1.38
												VSIG4	V-set and immunoglobulin domain containing 4	1.27
												VSTM1	V-set and transmembrane domain containing 1	1.21
												WDFY2	WD repeat and FYVE domain containing 2	-1.124
												WDFY3	WD repeat and FYVE domain containing 3	-1.205
												WDFY4	WDFY family member 4	-1.176
												WDR89	WD repeat domain 89	1.27
												WHRN	whirlin	-1.37
												WIPF1	WAS/WASL interacting protein family member 1	-1.149
												WNT10B	Wnt family member 10B	1.21
												XBP1	X-box binding protein 1	1.12
												XPNPEP3	X-prolyl aminopeptidase 3	-1.149
												YBX1P2	Y-box binding protein 1 pseudogene 2	1.21
												YBX1P10	Y-box binding protein 1 pseudogene 10	1.14
												ZC3H13	zinc finger CCCH-type containing 13	-1.124
												ZEB2	zinc finger E-box binding homeobox 2	-1.111
												ZMAT2	zinc finger matrin-type 2	1.19
												ZNF57	zinc finger protein 57	1.27
												ZNF181	zinc finger protein 181	1.26
												ZNF184	zinc finger protein 184	1.18
												ZNF208	zinc finger protein 208	1.34
												ZNF217	zinc finger protein 217	-1.099
												ZNF420	zinc finger protein 420	1.18
												ZNF438	zinc finger protein 438	-1.163
												ZNF491	zinc finger protein 491	1.23
												ZNF525	zinc finger protein 525	1.26
												ZNF608	zinc finger protein 608	-1.22
												ZNF669	zinc finger protein 669	1.26
												ZNF823	zinc finger protein 823	1.26
												ZNF827	zinc finger protein 827	-1.149
												ZNF829	zinc finger protein 829	1.2
												ZNF845	zinc finger protein 845	1.32
												ZNF101P2	zinc finger protein 101 pseudogene 2	-1.266
												ZNF322P1	zinc finger protein 322 pseudogene 1	4.82
												ZNF585A	zinc finger protein 585A	-1.19
												ZNHIT1	zinc finger HIT-type containing 1	1.19
												ZSWIM7	zinc finger SWIM-type containing 7	1.15
												ZYG11B	zyg-11 family member B, cell cycle regulator	-1.136
