# Supplementary material for: The impact of physical frailty on the response to inactivated influenza vaccine in older adults
Source: Aging (Albany NY). 2020 Dec 9;12(24):24633–50. doi: 10.18632/aging.202207 (PMC7803506; doi:10.18632/aging.202207)
Supplement: Supplementary Table 3 [file aging-12-202207-s003.xlsx]

## Sheet: Sheet1
Supplemental Table 3
Differentially expressed ribosomal protein genes in Frail and Non-Frail patients.
Day 0 - 7 Non-Frail				Day 0 - 7 Frail
Symbol	Entrez Gene Name	Expr Fold Change		Symbol	Entrez Gene Name	Expr Fold Change
RPL9P9	--	3.6		RPL41P1	ribosomal protein L41 pseudogene 1	-3.704
RPL21P3	ribosomal protein L21 pseudogene 3	2.13		RPL9P9	--	-2.326
RPS20P10	ribosomal protein S20 pseudogene 10	1.96		RPS3AP26	ribosomal protein S3a pseudogene 26	-1.887
RPL41P2	ribosomal protein L41 pseudogene 2	1.82		RPL7P1	ribosomal protein L7 pseudogene 1	-1.852
RPL7	ribosomal protein L7	1.63		RPS3A	ribosomal protein S3A	-1.818
RPL21P16	ribosomal protein L21 pseudogene 16	1.59		RPS3AP6	ribosomal protein S3A pseudogene 6	-1.754
RPL31	ribosomal protein L31	1.58		RPL31	ribosomal protein L31	-1.724
RPL34	ribosomal protein L34	1.58		RPL34	ribosomal protein L34	-1.724
RPL7P9	ribosomal protein L7 pseudogene 9	1.58		RPS3AP5	ribosomal protein S3A pseudogene 5	-1.724
RPS3AP6	ribosomal protein S3A pseudogene 6	1.58		RPL39P3	ribosomal protein L39 pseudogene 3	-1.695
RPS3A	ribosomal protein S3A	1.57		RPL7	ribosomal protein L7	-1.695
RPL26	ribosomal protein L26	1.53		RPS7P1	ribosomal protein S7 pseudogene 1	-1.695
RPL39	ribosomal protein L39	1.52		RPL39	ribosomal protein L39	-1.667
RPS20P14	ribosomal protein S20 pseudogene 14	1.51		RPS7P10	ribosomal protein S7 pseudogene 10	-1.667
RPS7	ribosomal protein S7	1.47		RPL7P9	ribosomal protein L7 pseudogene 9	-1.639
RPL21	ribosomal protein L21	1.44		RPS7	ribosomal protein S7	-1.639
RPL23	ribosomal protein L23	1.44		RPL9	ribosomal protein L9	-1.613
RPL22L1	ribosomal protein L22 like 1	1.43		RPL23	ribosomal protein L23	-1.587
RPL21P75	ribosomal protein L21 pseudogene 75	1.42		RPL26	ribosomal protein L26	-1.562
RPL22P1	ribosomal protein L22 pseudogene 1	1.42		RPL15P18	ribosomal protein L15 pseudogene 18	-1.515
RPL24P4	ribosomal protein L24 pseudogene 4	1.42		RPS24	ribosomal protein S24	-1.471
RPL7AP31	ribosomal protein L7a pseudogene 31	1.35		RPSAP19	ribosomal protein SA pseudogene 19	-1.429
RPL35	ribosomal protein L35	1.33		RPS17	ribosomal protein S17	-1.408
RPS27AP16	ribosomal protein S27a pseudogene 16	1.33		RPS27	ribosomal protein S27	-1.408
RPL13AP5	ribosomal protein L13a pseudogene 5	1.32		RPL22L1	ribosomal protein L22 like 1	-1.389
RPL35A	ribosomal protein L35a	1.31		RPL13AP5	ribosomal protein L13a pseudogene 5	-1.37
RPL30	ribosomal protein L30	1.3		RPL27	ribosomal protein L27	-1.37
RPS10	ribosomal protein S10	1.3		RPL24P4	ribosomal protein L24 pseudogene 4	-1.351
RPS21	ribosomal protein S21	1.29		RPL35	ribosomal protein L35	-1.351
RPS25	ribosomal protein S25	1.29		RPS15A	ribosomal protein S15a	-1.351
RPL24	ribosomal protein L24	1.28		RPS18	ribosomal protein S18	-1.351
RPS20	ribosomal protein S20	1.28		RPS21	ribosomal protein S21	-1.351
RPSAP19	ribosomal protein SA pseudogene 19	1.28		RPSAP12	ribosomal protein SA pseudogene 12	-1.333
RPL6	ribosomal protein L6	1.27		RPSAP58	ribosomal protein SA pseudogene 58	-1.333
RPL15P3	ribosomal protein L15 pseudogene 3	1.27		RPL11	ribosomal protein L11	-1.316
RPL5P34	ribosomal protein L5 pseudogene 34	1.27		RPS29	ribosomal protein S29	-1.316
RPL5	ribosomal protein L5	1.26		RPS4Y1	ribosomal protein S4 Y-linked 1	-1.316
RPL4P4	ribosomal protein L4 pseudogene 4	1.26		RPS6	ribosomal protein S6	-1.299
RPL6P27	ribosomal protein L6 pseudogene 27	1.26		RPL6	ribosomal protein L6	-1.282
RPS27A	ribosomal protein S27a	1.26		RPL6P27	ribosomal protein L6 pseudogene 27	-1.282
RPL13P12	ribosomal protein L13 pseudogene 12	1.25		RPS27A	ribosomal protein S27a	-1.282
RPL10AP6	ribosomal protein L10a pseudogene 6	1.24		RPS27AP16	ribosomal protein S27a pseudogene 16	-1.282
RPS23	ribosomal protein S23	1.24		RPL5	ribosomal protein L5	-1.266
RPS26	ribosomal protein S26	1.24		RPS20	ribosomal protein S20	-1.266
RPS12	ribosomal protein S12	1.23		RPL13A	ribosomal protein L13a	-1.25
RPL32	ribosomal protein L32	1.22		RPL3	ribosomal protein L3	-1.25
RPS8	ribosomal protein S8	1.21		RPS8	ribosomal protein S8	-1.25
RPS14	ribosomal protein S14	1.21		RPSAP15	ribosomal protein SA pseudogene 15	-1.25
RPL37	ribosomal protein L37	1.2		RPLP0	ribosomal protein lateral stalk subunit P0	-1.235
RPS5	ribosomal protein S5	1.2		RPS14	ribosomal protein S14	-1.235
RPS11	ribosomal protein S11	1.2		RPSA	ribosomal protein SA	-1.235
RPS13	ribosomal protein S13	1.2		RPL10AP6	ribosomal protein L10a pseudogene 6	-1.22
RPSA	ribosomal protein SA	1.2		RPL18AP3	ribosomal protein L18a pseudogene 3	-1.22
RPL13	ribosomal protein L13	1.19		RPL4	ribosomal protein L4	-1.22
RPL27A	ribosomal protein L27a	1.19		RPLP0P6	ribosomal protein lateral stalk subunit P0 pseudogene 6	-1.22
RPS15	ribosomal protein S15	1.19		RPS23	ribosomal protein S23	-1.205
RPL4	ribosomal protein L4	1.18		RPS5	ribosomal protein S5	-1.205
RPL12	ribosomal protein L12	1.18		RPS9	ribosomal protein S9	-1.205
RPL10A	ribosomal protein L10a	1.18		RPL29	ribosomal protein L29	-1.19
RPL36AL	ribosomal protein L36a like	1.18		RPL37	ribosomal protein L37	-1.19
RPL37A	ribosomal protein L37a	1.18		RPL10	ribosomal protein L10	-1.176
RPS3	ribosomal protein S3	1.18		RPL15	ribosomal protein L15	-1.176
RPL19	ribosomal protein L19	1.17		RPL23AP42	ribosomal protein L23a pseudogene 42	-1.176
RPL36	ribosomal protein L36	1.17		RPS13	ribosomal protein S13	-1.176
RPL23A	ribosomal protein L23a	1.17		RPS19	ribosomal protein S19	-1.176
RPL10	ribosomal protein L10	1.16		RPL7A	ribosomal protein L7a	-1.163
RPL29	ribosomal protein L29	1.16		RPL4P6	ribosomal protein L4 pseudogene 6	1.3
RPL18AP3	ribosomal protein L18a pseudogene 3	1.16		RPSAP36	ribosomal protein SA pseudogene 36	1.41
RPS4X	ribosomal protein S4 X-linked	1.16		RPS26P8	ribosomal protein S26 pseudogene 8	1.71
RPL14	ribosomal protein L14	1.15		RPL23AP2	ribosomal protein L23a pseudogene 2	2.56
RPL7A	ribosomal protein L7a	1.15		RPS26P6	ribosomal protein S26 pseudogene 6	3.17
RPS2P46	ribosomal protein S2 pseudogene 46	1.15
RPL22	ribosomal protein L22	1.14
RPL38	ribosomal protein L38	1.14
RPLP2	ribosomal protein lateral stalk subunit P2	1.14
RPS2	ribosomal protein S2	1.14
RPS19	ribosomal protein S19	1.14
RPA2	replication protein A2	1.13
RPL18	ribosomal protein L18	1.13
RPL23AP42	ribosomal protein L23a pseudogene 42	1.12
RPS6KA5	ribosomal protein S6 kinase A5	-1.149
RPS27AP12	ribosomal protein S27a pseudogene 12	-1.205
RPS3P2	ribosomal protein S3 pseudogene 2	-1.235
RPSAP16	ribosomal protein SA pseudogene 16	-1.235
RPL29P14	ribosomal protein L29 pseudogene 14	-1.266
RPS15AP29	ribosomal protein S15a pseudogene 29	-1.299
RPL21P123	ribosomal protein L21 pseudogene 123	-1.37
RPL41P1	ribosomal protein L41 pseudogene 1	-2.941
RPL21P134	ribosomal protein L21 pseudogene 134	-14.286
