# Supplementary material for: The impact of physical frailty on the response to inactivated influenza vaccine in older adults
Source: Aging (Albany NY). 2020 Dec 9;12(24):24633–50. doi: 10.18632/aging.202207 (PMC7803506; doi:10.18632/aging.202207)
Supplement: Supplementary Table 6 [file aging-12-202207-s005.xlsx]

## Sheet: Sheet1
Supplemental Table 6
Significantly altered gene expression pathways that correspond to Figure 1 heatmaps.
Day 0 F vs NF
Categories	Diseases or Functions Annotation	p-value	Activation z-score	# Molecules
Infectious Diseases	Replication of Herpesviridae	7.46e-09	3.124	10
Infectious Diseases	Replication of Murine herpesvirus 4	1.23e-05	2.236	5
Infectious Diseases	Replication of RNA virus	2.83e-05	2.429	30
Infectious Diseases	Replication of vesicular stomatitis virus	8.11e-07	3.111	10
Cell Signaling	Replication of viral replicon	1.47e-09	3.413	12
Infectious Diseases	Replication of virus	4.17e-05	2.771	31
Cellular Development,Cellular Growth and Proliferation,Hematological System Development and Function,Hematopoiesis,Tissue Development	Differentiation of hematopoietic progenitor cells	0.0171	-2.278	10
Cell-To-Cell Signaling and Interaction,Inflammatory Response	Immune response of leukocytes	0.00031	-2.042	10
Inflammatory Disease,Neurological Disease	Inflammatory demyelinating disease	0.000268	-2.985	19
Inflammatory Disease,Neurological Disease,Skeletal and Muscular Disorders	Multiple Sclerosis	0.000605	-2.985	18
Neurological Disease,Skeletal and Muscular Disorders	Neuromuscular disease	0.00113	-2.985	45
Cellular Development,Cellular Growth and Proliferation	Proliferation of blood cells	0.00778	-2.618	18
Cellular Development,Cellular Growth and Proliferation,Hematological System Development and Function,Lymphoid Tissue Structure and Development	Proliferation of immune cells	0.0182	-2.368	15
Inflammatory Disease,Neurological Disease,Skeletal and Muscular Disorders	Relapsing-remitting multiple sclerosis	8.47e-05	-2.985	11
Day 3 F vs NF
Categories	Diseases or Functions Annotation	p-value	Activation z-score	# Molecules
Infectious Diseases	Replication of Murine herpesvirus 4	0.000284	2	4
Infectious Diseases	Replication of RNA virus	2.58e-06	2.556	33
Infectious Diseases	Replication of Herpesviridae	1.91e-06	2.785	8
Infectious Diseases	Replication of virus	4.29e-06	2.85	34
Infectious Diseases	Replication of vesicular stomatitis virus	1.02e-06	3.111	10
Cell Signaling	Replication of viral replicon	2.81e-07	3.116	10
Cell Signaling	Viral life cycle	1.23e-05	3.116	13
Cardiovascular System Development and Function	Development of vasculature	0.00239	-3.116	30
Cardiovascular System Development and Function,Organismal Development	Angiogenesis	0.0059	-3.116	28
Cell-To-Cell Signaling and Interaction,Inflammatory Response	Immune response of leukocytes	1.65e-05	-3.081	12
Inflammatory Response	Immune response of cells	2.32e-06	-3.045	25
Inflammatory Disease,Neurological Disease,Skeletal and Muscular Disorders	Relapsed multiple sclerosis	0.000315	-2.63	11
Inflammatory Disease,Neurological Disease,Skeletal and Muscular Disorders	Relapsing-remitting multiple sclerosis	0.00187	-2.63	9
Inflammatory Disease,Neurological Disease,Skeletal and Muscular Disorders	Multiple Sclerosis	0.00205	-2.63	17
Neurological Disease,Skeletal and Muscular Disorders	Neuromuscular disease	0.00525	-2.63	43
Cell-To-Cell Signaling and Interaction	Response of myeloid cells	0.0033	-2.592	7
Cellular Movement	Invasion of cells	0.000322	-2.459	48
Cellular Movement	Invasion of tumor cell lines	0.000871	-2.301	43
Cell-To-Cell Signaling and Interaction,Cellular Compromise,Cellular Function and Maintenance,Inflammatory Response	Respiratory burst of granulocytes	7.28e-05	-2.2	5
Cell-To-Cell Signaling and Interaction,Inflammatory Response	Immune response of antigen presenting cells	0.00336	-2.111	5
Cell Death and Survival	Cell survival	0.0141	-2.041	53
Day 7 F vs NF
Categories	Diseases or Functions Annotation	p-value	Activation z-score	# Molecules
Cell Signaling	Replication of viral replicon	4.57e-08	2.91	12
Cell Signaling	Viral life cycle	6.38e-07	2.759	17
Cellular Development,Reproductive System Development and Function	Epithelial-mesenchymal transition of breast cell lines	0.0221	2.2	5
Cellular Movement	Migration of cells	1.61e-05	3.848	99
Cellular Movement	Cell movement	3.12e-05	3.834	107
Cellular Movement	Migration of tumor cell lines	0.000772	3.37	59
Cellular Movement	Cell movement of tumor cell lines	0.00205	3.354	65
Cellular Movement	Invasion of tumor cell lines	0.0201	2.935	47
Infectious Diseases	Viral Infection	2.11e-06	3.246	107
Infectious Diseases	Replication of Herpesviridae	1.54e-05	2.646	8
Infectious Diseases	Replication of virus	0.000126	3.32	37
Infectious Diseases	Replication of RNA virus	0.000147	3.207	35
Infectious Diseases	Replication of vesicular stomatitis virus	0.000462	2.01	8
Infectious Diseases	Replication of Murine herpesvirus 4	0.000832	2	4
Inflammatory Disease,Neurological Disease,Skeletal and Muscular Disorders	Relapsing-remitting multiple sclerosis	7.99e-05	-2.813	13
Inflammatory Disease,Neurological Disease,Skeletal and Muscular Disorders	Multiple Sclerosis	0.00352	-2.813	20
Neurological Disease	Progressive motor neuropathy	0.00752	-2.813	37
Neurological Disease	Progressive neurological disorder	0.0242	-2.813	39
Neurological Disease,Skeletal and Muscular Disorders	Neuromuscular disease	0.000187	-2.813	61
